# Supplementary material
Source: MDPI journal article supplement (https://www.mdpi.com/1999-4907/14/6/1203)
Supplement: s1 [file s1]

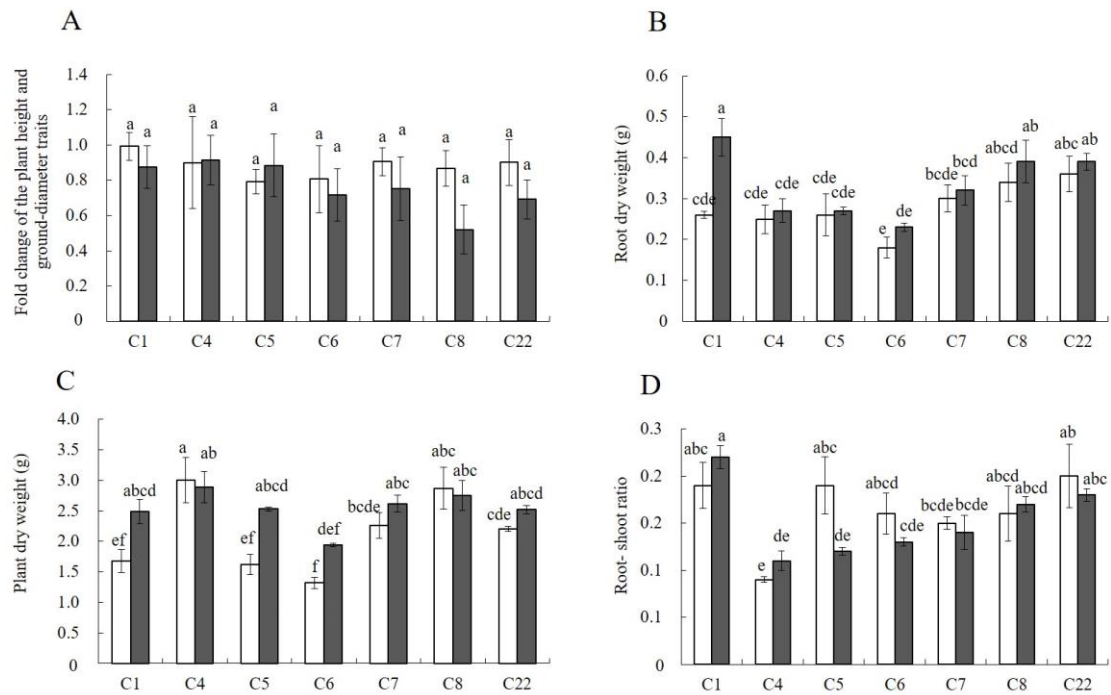

**Figure S1. Growth of Chinese fir clones under Pi-deficiency stress.** (A) The blank and black columns represent the fold change of the plant height and ground-diameter traits under Pi-deficiency treatment compared to Pi-sufficient treatments, respectively. (B-D) The blank and black columns represent the treatments of Pi-deficiency (-P) and Pi-sufficient treatments (+P), respectively. The different letters above the columns indicate statistically significant differences ( $p < 0.05$ ) according to a Duncan's test.

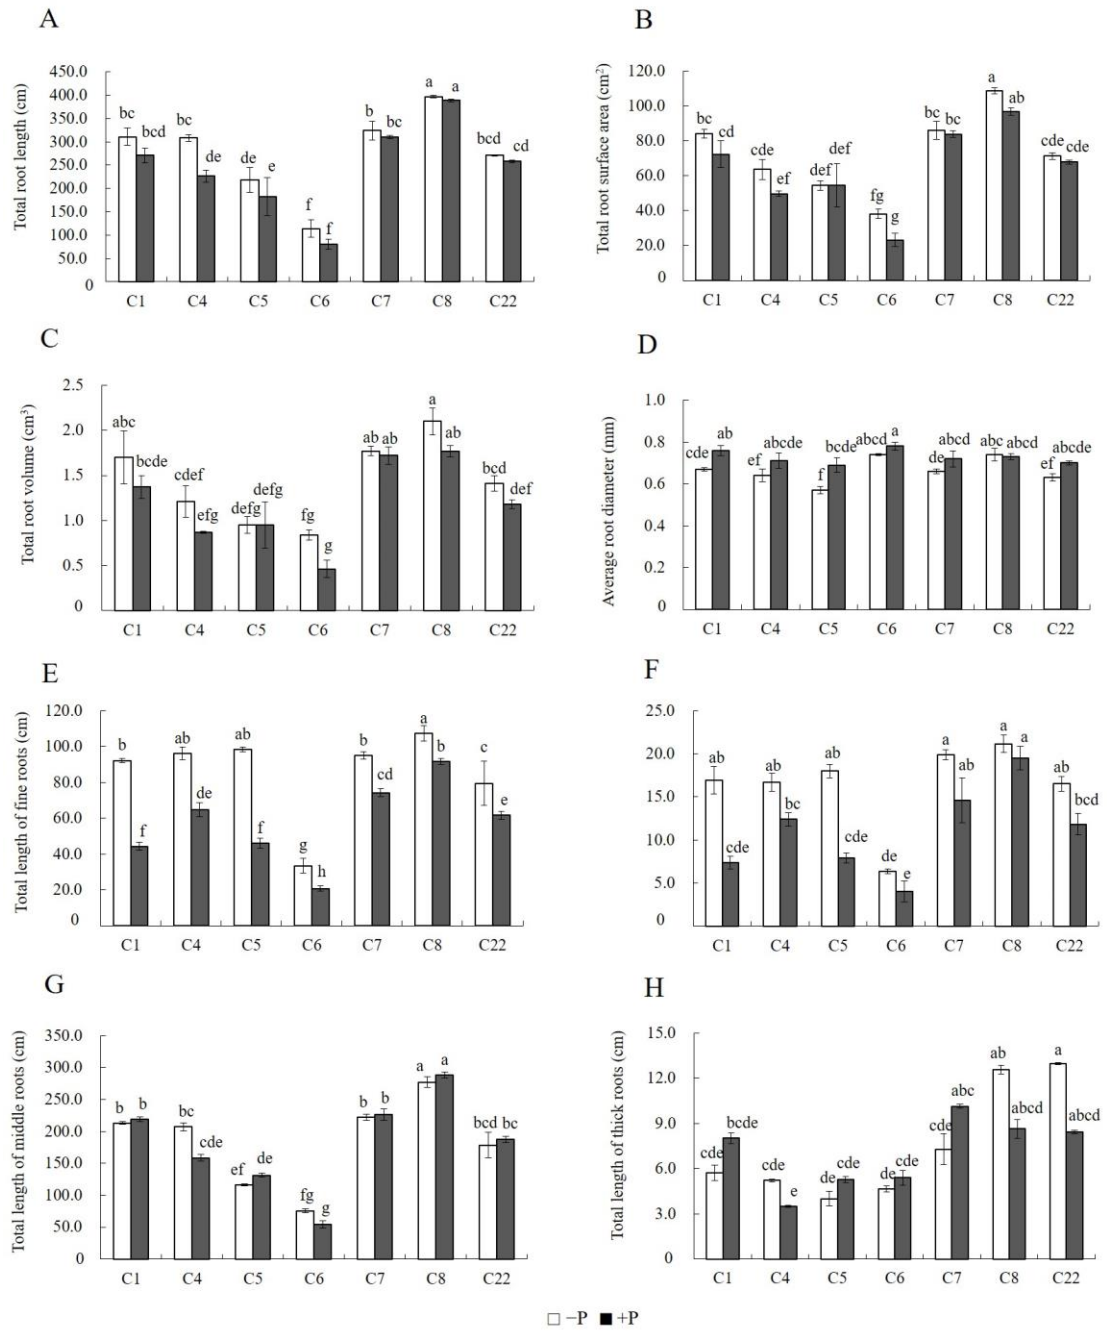

**Figure S2. The root morphology parameters of Chinese fir clones under Pi-deficiency stress. +P:** Pi-sufficient treatments, -P: Pi-deficiency treatments. The different letters above the columns indicate statistically significant differences ( $p < 0.05$ ) according to a Duncan's test.

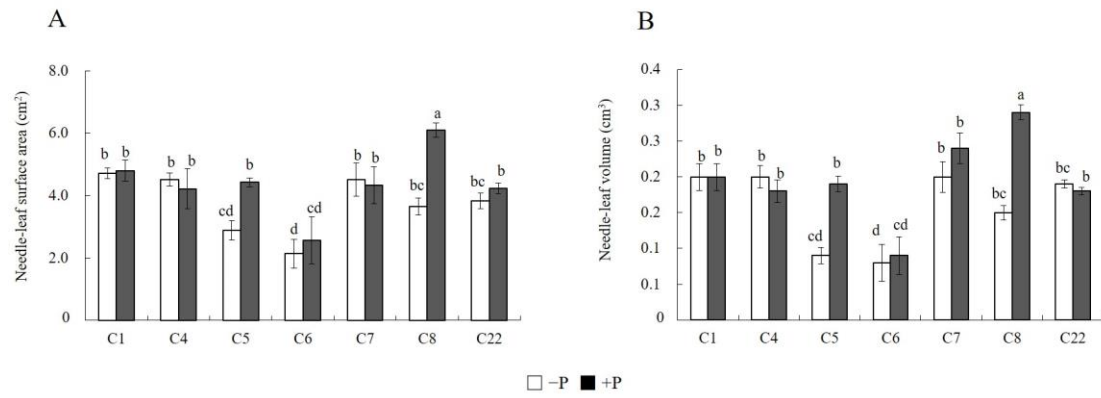

**Figure S3: The needle-leaf morphology parameters of Chinese fir clones under Pi-deficiency stress.** +P: Pi-sufficient treatments, -P: Pi-deficiency treatments. The different letters above the columns indicate statistically significant differences ( $p < 0.05$ ) according to a Duncan's test.

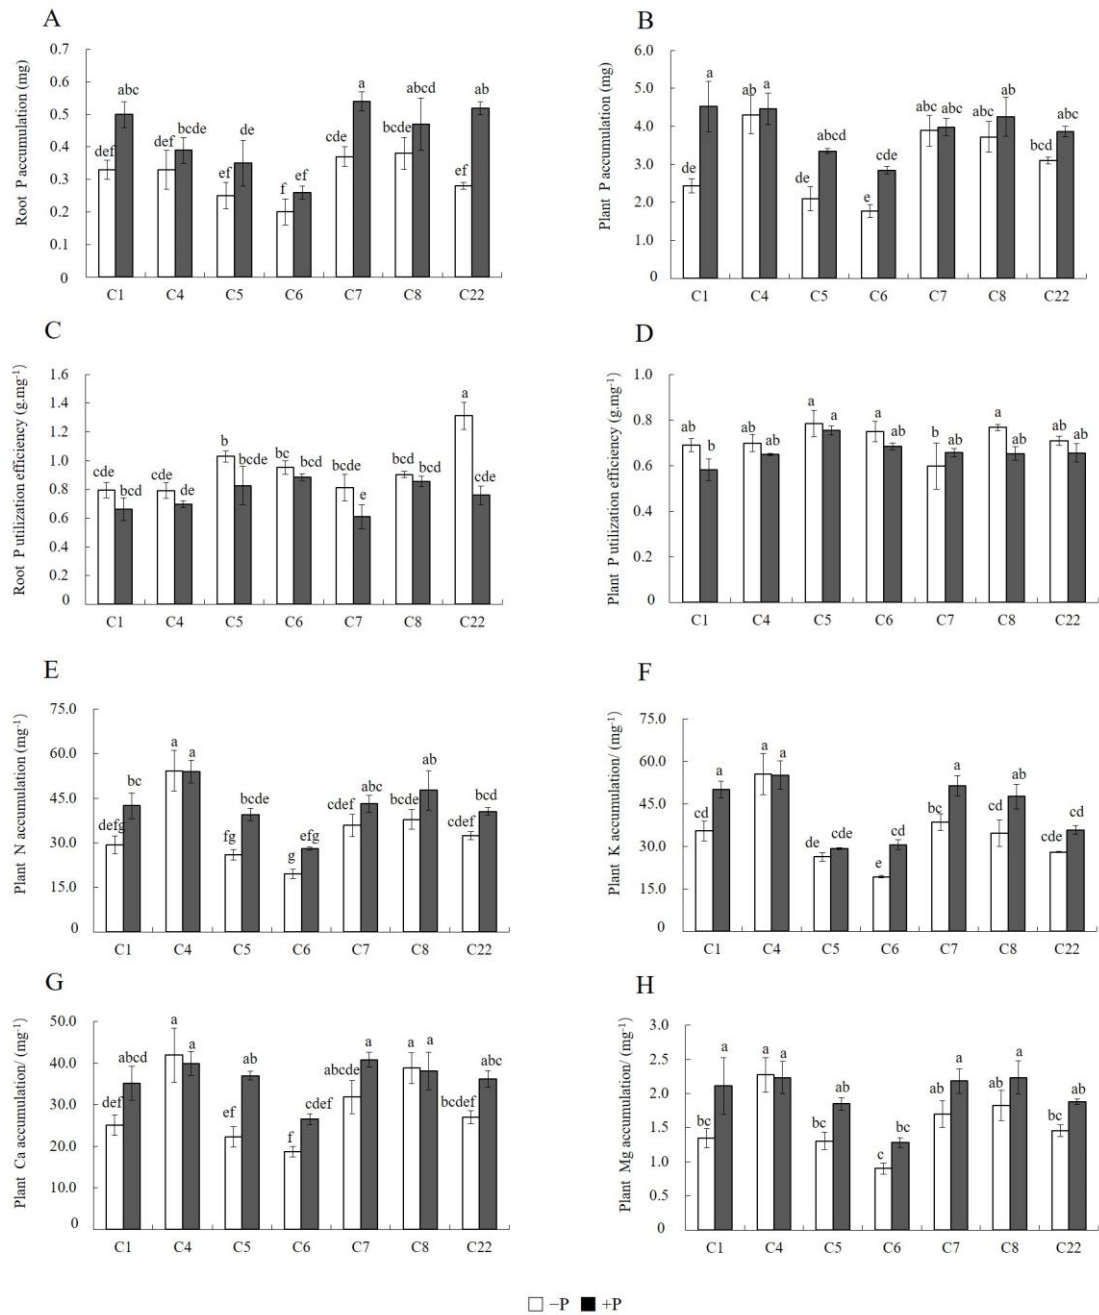

**Figure S4: The nutrients content of Chinese fir clones under Pi-deficiency stress. +P: Pi-sufficient treatments, -P: Pi-deficiency treatments. The different letters above the columns indicate statistically significant differences ( $p < 0.05$ ) according to a Duncan's test.**

# Nr Homologous Species Distribution

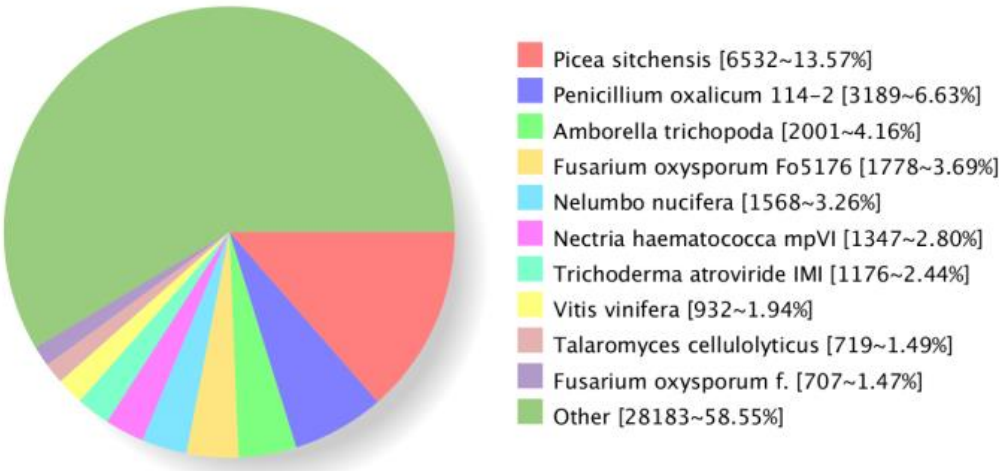

Figure S5. Homologous species distribution in Nr database of clone C5.

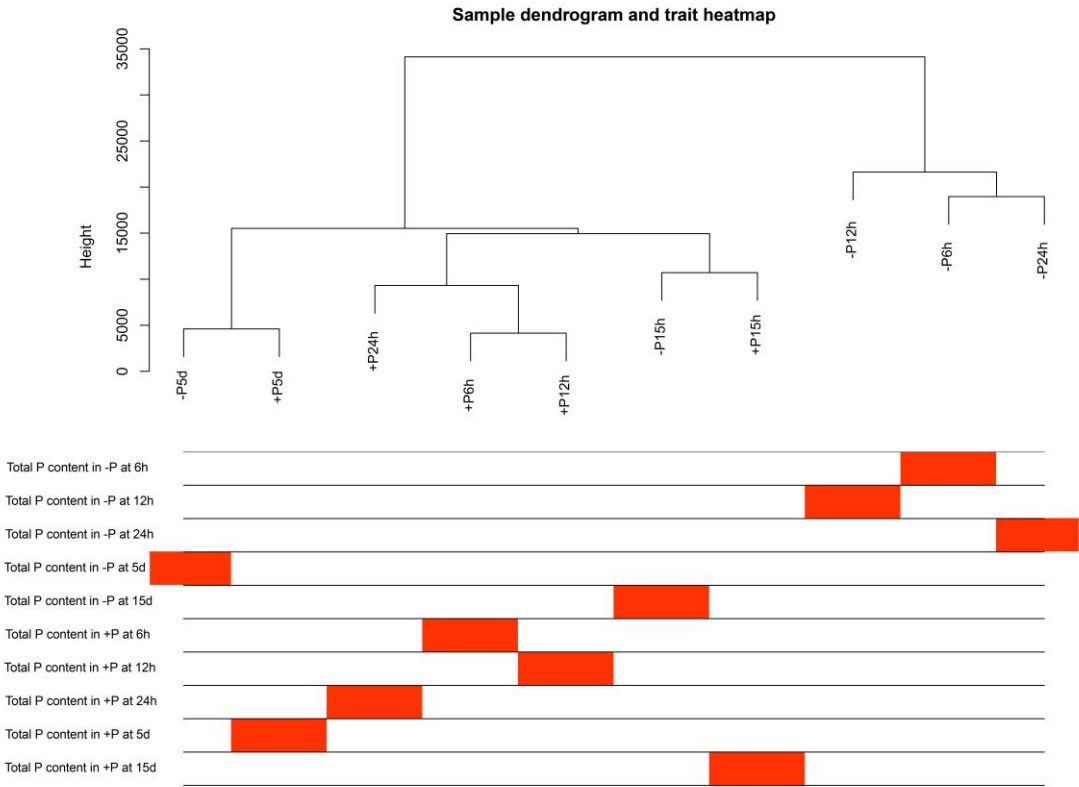

Figure S6. The trait heatmap in WGCNA. +P: Pi-sufficient treatments, -P: Pi-deficiency treatments.
