# Supplementary material
Source: MDPI journal article supplement (https://www.mdpi.com/1999-4907/14/6/1203)
Supplement: s1 [file s1 › supplyment Table.xlsx]

## Sheet: Table S1
	Table S1. Basic information of test materials in this study
Clone	Source of materials
C1	The elite clone from 12-year-old clonal test plantation of Chinese fir at Qujiang state-owned forest farm of Shaoguan City, Guangdong Province, China.
C4	The elite clone from 12-year-old clonal test plantation of Chinese fir at Qujiang state-owned forest farm of Shaoguan City, Guangdong Province, China.
C5	The plus tree from 8-year-old progeny test plantation of Chinese fir at Tongle state-owned forest farm of Yunfu City, Guangdong Province, China.
C6	The plus tree from 8-year-old progeny test plantation of Chinese fir at Tongle state-owned forest farm of Yunfu City, Guangdong Province, China.
C7	The elite clone from 12-year-old clonal test plantation of Chinese fir at Qujiang state-owned forest farm of Shaoguan City, Guangdong Province, China.
C8	The elite clone from 12-year-old clonal test plantation of Chinese fir at Qujiang state-owned forest farm of Shaoguan City, Guangdong Province, China.
C22	The super seedling from Chinese fir faminly “Lianchong 11” selected by Guangdong Academy of Forestry.

## Sheet: Table S2
	Table S2. Five randomly selected genes and the primer sequence used in this study
Unigene ID	Annotation	Homologous gene	Primer sequence（5'→3'）	Annealing temperature (℃)
c243749.graph_c0	Purple acid phosphatase 15	ClPAP15	F: GCGTGGTGAAGTATGGCGT	55
			R: GGATCCCCGCATTTGTAATAGTA
c220976.graph_c1	WRKY transcription factor 35	ClWRKY35	F: AGAGTATCTCCTGCCTTCAGTAATCT	55
			R: TAGCCGCATACATTCACCGT
c236464.graph_c0	Calcium-dependent protein kinase 1	ClCDPK1	F: GTGTGGTTCATTTTAGGGCTTG	55
			R: TCCTTCAGTCGCACATCGTAA
c237148.graph_c0	ACC oxidase	ClOX	F: GGCAATCGTTTATCAGTGGC	55
			R: TTCATCACTGCTCTCACCACC
c239642.graph_c0	Transmembrane amino acid transporter protein	ClAAT	F: GTTTGTGGCCCAACTTGTGA	55
			R: TTGTGCAGTACGTGACCGC
Unigene 41195	glyceraldehyde-3-phosphate dehydrogenase, cytosolic	GAPDH	F: ATATCGAGCTCGTTGCAGTG	55
			R: CATCCTTGACCTTGACCTCAT

## Sheet: Table S3
Table S3. Principal components loading matrix for seven Chinese fir clones based on twenty morphological and nutrient traits
Trait	Principal component
	PIN1	PIN2	PIN3
total root length	0.1806	0.1948	0.1089
total root surface area	0.4088	0.2025	0.217
total root volume	0.3856	0.1953	0.3028
average root diameter	-0.0395	0.0353	0.0106
fine root length	0.443	-0.3113	-0.0031
middle root length	0.1924	0.2483	0.1313
coarse root length	-0.427	0.2786	0.2403
root-shoot ratio	0.1365	-0.2183	0.3911
root dry mass	-0.1128	0.0124	0.1677
plant dry mass	-0.2089	0.1489	-0.1501
leaf surface area	0.0688	0.2872	-0.2636
leaf volume	0.1285	0.5794	-0.1302
root P accumulation	0.0344	0.037	-0.0832
root P utilization efficiency	-0.1587	-0.1482	0.4609
plant P accumulation	-0.239	0.0998	-0.0218
plant P utilization efficiency	0.0581	0.0347	-0.1471
plant K accumulation	-0.0719	0.0191	0.1211
plant Ca accumulation	-0.1349	0.1786	-0.2331
plant Mg accumulation	-0.0988	0.1399	-0.0293
plant N accumulation	-0.1347	0.1431	-0.028
contribution rate /%	0.4529	0.2742	0.168

## Sheet: Table S4
Table S4. Membership function values of seven Chinese fir Clones
	Clone	R(Xi)
	C4	0.735
	C6	0.571
	C8	0.555
	C7	0.511
	C1	0.416
	C22	0.387
	C5	0.347

## Sheet: Table S5
	Table S5. GO classification analysis of the assembled unigenes in developing clone C5 roots.
Treatment time	#GO_classify1	GO_classify2	GO_ID	AllGene_number	Selected_gene_number	Selected_gene_ID
6h	biological process	metabolic process	GO:0008152	17262	1073	c183054.graph_c0;c243665.graph_c0;c236403.graph_c0;c242306.graph_c0;c230851.graph_c0;c203951.graph_c0;c234661.graph_c0;c216283.graph_c1;c238059.graph_c2;c243293.graph_c0;c226133.graph_c0;c194129.graph_c0;c243782.graph_c1;c231752.graph_c0;c232505.graph_c1;c209872.graph_c2;c243229.graph_c0;c237601.graph_c0;c222068.graph_c0;c212121.graph_c0;c194127.graph_c0;c242325.graph_c0;c207375.graph_c0;c210117.…
	biological process	cellular process	GO:0009987	15859	943	c232924.graph_c3;c229982.graph_c0;c235923.graph_c0;c224649.graph_c0;c232688.graph_c2;c218584.graph_c0;c243616.graph_c1;c212846.graph_c0;c231566.graph_c0;c236882.graph_c1;c216149.graph_c1;c207698.graph_c0;c242422.graph_c1;c239401.graph_c0;c240804.graph_c0;c241418.graph_c3;c234814.graph_c0;c232583.graph_c0;c232998.graph_c2;c228114.graph_c0;c215731.graph_c0;c243144.graph_c1;c229884.graph_c0;c181973.…
	biological process	single-organism process	GO:0044699	12284	866	c228094.graph_c0;c215875.graph_c0;c222435.graph_c0;c232668.graph_c0;c235130.graph_c0;c227597.graph_c0;c243007.graph_c0;c235960.graph_c1;c148705.graph_c0;c236579.graph_c0;c195152.graph_c0;c238200.graph_c0;c218823.graph_c0;c222800.graph_c0;c228855.graph_c2;c202439.graph_c0;c231595.graph_c0;c229383.graph_c0;c221869.graph_c0;c243544.graph_c0;c227232.graph_c0;c221570.graph_c0;c237463.graph_c3;c209618.…
	biological process	localization	GO:0051179	4116	273	c227597.graph_c0;c239620.graph_c1;c232302.graph_c1;c243540.graph_c0;c228094.graph_c0;c211481.graph_c0;c202439.graph_c0;c231595.graph_c0;c187689.graph_c0;c240335.graph_c4;c238893.graph_c1;c231595.graph_c1;c226126.graph_c0;c203507.graph_c0;c204055.graph_c0;c234020.graph_c3;c241957.graph_c3;c208945.graph_c1;c220321.graph_c0;c237463.graph_c3;c209618.graph_c0;c228463.graph_c1;c226856.graph_c0;c236686.…
	biological process	response to stimulus	GO:0050896	3917	419	c222800.graph_c0;c202439.graph_c0;c227311.graph_c0;c236044.graph_c0;c193588.graph_c1;c236131.graph_c3;c241925.graph_c0;c235394.graph_c0;c236579.graph_c0;c243889.graph_c0;c238893.graph_c1;c227674.graph_c2;c221553.graph_c0;c241934.graph_c1;c236756.graph_c0;c232844.graph_c0;c239620.graph_c1;c215875.graph_c0;c228094.graph_c0;c222435.graph_c0;c231764.graph_c2;c238254.graph_c0;c239337.graph_c1;c226856.…
	biological process	biological regulation	GO:0065007	3911	322	c231192.graph_c2;c236564.graph_c1;c234056.graph_c0;c223682.graph_c0;c238317.graph_c0;c234627.graph_c0;c224548.graph_c0;c242520.graph_c0;c226366.graph_c1;c241706.graph_c0;c225938.graph_c0;c209536.graph_c1;c225399.graph_c1;c232002.graph_c0;c215294.graph_c0;c223332.graph_c1;c242259.graph_c0;c221662.graph_c0;c204952.graph_c0;c240293.graph_c0;c212692.graph_c2;c240497.graph_c2;c238871.graph_c0;c190188.…
	biological process	cellular component organization or biogenesis	GO:0071840	2916	153	c236044.graph_c0;c235030.graph_c1;c236013.graph_c0;c218857.graph_c0;c238893.graph_c1;c232649.graph_c1;c222439.graph_c0;c240042.graph_c0;c240690.graph_c0;c226349.graph_c0;c227756.graph_c0;c240280.graph_c0;c207158.graph_c0;c225337.graph_c1;c211481.graph_c0;c238064.graph_c1;c193566.graph_c0;c241872.graph_c3;c236141.graph_c1;c191387.graph_c0;c183202.graph_c0;c227288.graph_c0;c237574.graph_c2;c232080.…
	biological process	developmental process	GO:0032502	1668	171	c230912.graph_c0;c201584.graph_c0;c241395.graph_c0;c204048.graph_c0;c220915.graph_c1;c234853.graph_c0;c238042.graph_c0;c205443.graph_c1;c231454.graph_c0;c194705.graph_c0;c193300.graph_c0;c229024.graph_c0;c208686.graph_c1;c240284.graph_c3;c215149.graph_c0;c228050.graph_c0;c240619.graph_c0;c227218.graph_c0;c193439.graph_c0;c233625.graph_c1;c235880.graph_c0;c205548.graph_c0;c219447.graph_c0;c232465.…
	biological process	multicellular organismal process	GO:0032501	1384	155	c235880.graph_c0;c193439.graph_c0;c233625.graph_c1;c233267.graph_c0;c232465.graph_c1;c236357.graph_c0;c235131.graph_c1;c205548.graph_c0;c219447.graph_c0;c230996.graph_c0;c216719.graph_c1;c239642.graph_c0;c231310.graph_c0;c194557.graph_c0;c239164.graph_c0;c233431.graph_c1;c230912.graph_c0;c241395.graph_c0;c196835.graph_c1;c204048.graph_c0;c220915.graph_c1;c234853.graph_c0;c205443.graph_c1;c229024.…
	biological process	signaling	GO:0023052	1158	119	c239620.graph_c1;c241964.graph_c1;c235110.graph_c0;c232844.graph_c0;c236756.graph_c0;c229264.graph_c0;c240863.graph_c2;c211521.graph_c0;c237077.graph_c1;c238957.graph_c1;c235346.graph_c0;c228094.graph_c0;c182735.graph_c0;c241243.graph_c0;c193588.graph_c1;c232564.graph_c0;c236044.graph_c0;c207291.graph_c1;c194347.graph_c0;c238632.graph_c0;c217493.graph_c2;c211946.graph_c0;c227674.graph_c2;c231558.…
	biological process	reproductive process	GO:0022414	807	71	c148718.graph_c0;c235926.graph_c1;c207245.graph_c0;c212588.graph_c0;c219568.graph_c0;c193961.graph_c0;c238893.graph_c1;c227311.graph_c0;c236044.graph_c0;c239665.graph_c1;c227501.graph_c0;c207158.graph_c0;c240690.graph_c0;c226349.graph_c0;c240042.graph_c0;c213202.graph_c0;c243782.graph_c1;c237785.graph_c0;c236906.graph_c0;c222735.graph_c0;c207375.graph_c0;c232080.graph_c2;c226144.graph_c0;c213235.…
	biological process	multi-organism process	GO:0051704	727	73	c241872.graph_c3;c215122.graph_c0;c226856.graph_c0;c238064.graph_c1;c241004.graph_c0;c242482.graph_c3;c237785.graph_c0;c232086.graph_c2;c237574.graph_c2;c219447.graph_c1;c224940.graph_c0;c242818.graph_c0;c236753.graph_c0;c222671.graph_c0;c150330.graph_c0;c224696.graph_c0;c234545.graph_c0;c209618.graph_c0;c146757.graph_c0;c236131.graph_c3;c241155.graph_c0;c220304.graph_c0;c236403.graph_c0;c194256.…
	biological process	growth	GO:0040007	403	47	c239030.graph_c3;c239878.graph_c1;c233395.graph_c0;c208686.graph_c1;c132944.graph_c0;c243720.graph_c0;c231454.graph_c0;c238051.graph_c1;c209618.graph_c0;c243616.graph_c1;c241872.graph_c3;c238042.graph_c0;c238064.graph_c1;c213235.graph_c0;c207375.graph_c0;c237949.graph_c3;c183202.graph_c0;c237281.graph_c0;c240690.graph_c0;c227740.graph_c0;c227756.graph_c0;c233930.graph_c0;c240042.graph_c0;c233431.…
	biological process	reproduction	GO:0000003	395	16	c214143.graph_c1;c233428.graph_c0;c237887.graph_c0;c240690.graph_c0;c223573.graph_c0;c227501.graph_c0;c239665.graph_c1;c221662.graph_c0;c243720.graph_c0;c207274.graph_c0;c243404.graph_c1;c148718.graph_c0;c233047.graph_c0;c226144.graph_c0;c231354.graph_c2;c219568.graph_c0
	biological process	immune system process	GO:0002376	224	40	c228883.graph_c0;c215122.graph_c0;c226856.graph_c0;c240997.graph_c0;c231317.graph_c0;c223307.graph_c0;c242818.graph_c0;c224940.graph_c0;c237574.graph_c2;c222671.graph_c0;c237742.graph_c1;c236753.graph_c0;c230786.graph_c0;c212846.graph_c0;c228463.graph_c1;c221753.graph_c0;c224696.graph_c0;c220155.graph_c0;c146757.graph_c0;c236044.graph_c0;c194256.graph_c0;c220304.graph_c0;c236131.graph_c3;c194347.…
	biological process	biological adhesion	GO:0022610	39	4	c220321.graph_c0;c233431.graph_c1;c225065.graph_c0;c236013.graph_c0
	biological process	biological phase	GO:0044848	34	1	c207274.graph_c0
	biological process	rhythmic process	GO:0048511	30	4	c222735.graph_c0;c223766.graph_c0;c227311.graph_c0;c227361.graph_c0
	biological process	locomotion	GO:0040011	14	0
	biological process	cell killing	GO:0001906	10	1	c210255.graph_c0
	cellular component	cell	GO:0005623	12065	686	c238871.graph_c0;c219994.graph_c0;c243113.graph_c0;c240997.graph_c0;c230936.graph_c0;c234424.graph_c0;c237508.graph_c0;c223307.graph_c0;c232998.graph_c2;c240407.graph_c1;c215731.graph_c0;c239401.graph_c0;c241418.graph_c3;c232583.graph_c0;c234814.graph_c0;c242422.graph_c1;c216149.graph_c1;c236248.graph_c1;c229870.graph_c0;c223998.graph_c0;c208614.graph_c0;c241273.graph_c0;c224649.graph_c0;c235923.…
	cellular component	cell part	GO:0044464	12065	686	c207309.graph_c0;c228464.graph_c1;c236948.graph_c0;c239030.graph_c3;c191786.graph_c0;c185220.graph_c0;c244027.graph_c0;c239686.graph_c0;c239878.graph_c1;c237857.graph_c0;c232022.graph_c2;c230782.graph_c0;c215154.graph_c0;c216968.graph_c0;c224159.graph_c0;c233463.graph_c2;c238753.graph_c0;c209242.graph_c0;c242272.graph_c0;c243196.graph_c0;c223555.graph_c0;c221949.graph_c0;c240863.graph_c2;c225654.…
	cellular component	organelle	GO:0043226	9174	513	c228152.graph_c0;c231920.graph_c0;c239113.graph_c0;c232949.graph_c0;c235702.graph_c0;c218848.graph_c0;c224452.graph_c0;c211990.graph_c0;c217722.graph_c0;c194256.graph_c0;c69675.graph_c0;c181614.graph_c0;c212588.graph_c0;c208303.graph_c0;c239037.graph_c0;c204062.graph_c0;c224578.graph_c0;c213777.graph_c0;c236753.graph_c0;c224355.graph_c0;c237468.graph_c0;c239824.graph_c2;c241841.graph_c1;c225552.g…
	cellular component	membrane	GO:0016020	5981	453	c192264.graph_c0;c219994.graph_c0;c234812.graph_c0;c230936.graph_c0;c221461.graph_c0;c240997.graph_c0;c234424.graph_c0;c231317.graph_c0;c154540.graph_c0;c181973.graph_c0;c227573.graph_c0;c224033.graph_c0;c223307.graph_c0;c234283.graph_c2;c215731.graph_c0;c240068.graph_c0;c236436.graph_c1;c231726.graph_c0;c243494.graph_c1;c211492.graph_c0;c236248.graph_c1;c74773.graph_c1;c230786.graph_c0;c229870.g…
	cellular component	macromolecular complex	GO:0032991	4313	76	c219994.graph_c0;c222463.graph_c0;c192264.graph_c0;c235300.graph_c0;c205379.graph_c0;c203803.graph_c1;c230269.graph_c0;c237388.graph_c1;c243537.graph_c1;c204272.graph_c0;c225065.graph_c0;c232998.graph_c2;c222714.graph_c0;c241418.graph_c3;c237483.graph_c0;c232534.graph_c0;c218030.graph_c0;c242422.graph_c1;c211492.graph_c0;c236106.graph_c0;c235544.graph_c0;c202934.graph_c0;c193300.graph_c0;c230786.…
	cellular component	organelle part	GO:0044422	3894	183	c239086.graph_c0;c230257.graph_c0;c237483.graph_c0;c234355.graph_c0;c212588.graph_c2;c242422.graph_c1;c211492.graph_c0;c225485.graph_c0;c230786.graph_c0;c233395.graph_c0;c235923.graph_c0;c208614.graph_c0;c224649.graph_c0;c241357.graph_c0;c234390.graph_c0;c238871.graph_c0;c228510.graph_c0;c192264.graph_c0;c242484.graph_c0;c231432.graph_c2;c240997.graph_c0;c205379.graph_c0;c233047.graph_c0;c154540.…
	cellular component	membrane part	GO:0044425	3333	185	c218030.graph_c0;c229401.graph_c1;c219097.graph_c0;c227218.graph_c0;c234543.graph_c3;c235544.graph_c0;c240556.graph_c1;c230856.graph_c1;c231454.graph_c0;c213500.graph_c0;c193300.graph_c0;c229343.graph_c0;c233671.graph_c0;c228050.graph_c0;c231971.graph_c0;c233660.graph_c0;c236672.graph_c0;c73792.graph_c0;c235423.graph_c0;c219723.graph_c3;c234181.graph_c0;c229376.graph_c0;c230379.graph_c3;c205661.g…
	cellular component	membrane-enclosed lumen	GO:0031974	903	11	c230786.graph_c0;c233047.graph_c0;c205082.graph_c0;c241623.graph_c0;c241357.graph_c0;c235300.graph_c0;c224159.graph_c0;c233178.graph_c0;c224025.graph_c0;c238064.graph_c1;c227740.graph_c0
	cellular component	extracellular region	GO:0005576	734	78	c181973.graph_c0;c235038.graph_c0;c234508.graph_c0;c201584.graph_c0;c232649.graph_c0;c230464.graph_c1;c242484.graph_c0;c230936.graph_c0;c194497.graph_c1;c147000.graph_c0;c79872.graph_c0;c234390.graph_c0;c232646.graph_c0;c230786.graph_c0;c208686.graph_c1;c192936.graph_c0;c211492.graph_c0;c232513.graph_c1;c212588.graph_c2;c240873.graph_c0;c154904.graph_c0;c232534.graph_c0;c218030.graph_c0;c208811.g…
	cellular component	cell junction	GO:0030054	315	33	c207158.graph_c0;c235513.graph_c0;c242125.graph_c1;c212365.graph_c0;c233431.graph_c1;c181044.graph_c0;c240042.graph_c0;c221033.graph_c0;c212588.graph_c0;c201992.graph_c0;c230210.graph_c1;c235833.graph_c0;c194256.graph_c0;c187128.graph_c0;c74927.graph_c0;c234545.graph_c0;c208686.graph_c1;c194499.graph_c0;c236511.graph_c5;c234390.graph_c0;c220321.graph_c0;c154904.graph_c0;c232583.graph_c0;c212588.g…
	cellular component	symplast	GO:0055044	314	33	c234545.graph_c0;c208686.graph_c1;c194499.graph_c0;c236511.graph_c5;c220321.graph_c0;c234390.graph_c0;c154904.graph_c0;c232583.graph_c0;c212588.graph_c2;c222486.graph_c0;c234508.graph_c0;c207375.graph_c0;c224940.graph_c0;c238753.graph_c0;c237063.graph_c0;c235300.graph_c0;c222638.graph_c0;c226856.graph_c0;c207158.graph_c0;c235513.graph_c0;c242125.graph_c1;c212365.graph_c0;c233431.graph_c1;c181044.…
	cellular component	nucleoid	GO:0009295	57	0
	cellular component	extracellular region part	GO:0044421	13	0
	cellular component	virion	GO:0019012	10	0
	cellular component	virion part	GO:0044423	10	0
	molecular function	catalytic activity	GO:0003824	15424	1212	c230786.graph_c0;c239891.graph_c0;c235071.graph_c2;c210261.graph_c0;c236548.graph_c0;c242039.graph_c2;c229290.graph_c0;c243711.graph_c0;c154540.graph_c0;c241126.graph_c0;c242642.graph_c0;c218699.graph_c0;c232061.graph_c0;c224357.graph_c0;c194547.graph_c0;c234894.graph_c1;c228228.graph_c1;c155775.graph_c0;c240293.graph_c0;c237148.graph_c0;c241979.graph_c1;c241623.graph_c0;c212103.graph_c0;c242778.…
	molecular function	binding	GO:0005488	13436	923	c236244.graph_c0;c221447.graph_c1;c240765.graph_c0;c70048.graph_c0;c237676.graph_c0;c224054.graph_c0;c209014.graph_c1;c230972.graph_c1;c204633.graph_c0;c232962.graph_c0;c230464.graph_c1;c193660.graph_c0;c220915.graph_c1;c215548.graph_c0;c177571.graph_c0;c228050.graph_c0;c233660.graph_c0;c237626.graph_c0;c240352.graph_c0;c208686.graph_c1;c230856.graph_c1;c230327.graph_c0;c227218.graph_c0;c209207.g…
	molecular function	transporter activity	GO:0005215	1862	133	c231595.graph_c0;c187689.graph_c0;c235166.graph_c0;c178982.graph_c0;c238741.graph_c0;c236013.graph_c0;c240335.graph_c4;c239620.graph_c1;c231977.graph_c0;c237077.graph_c1;c237488.graph_c0;c229374.graph_c1;c242269.graph_c1;c243540.graph_c0;c243240.graph_c2;c236657.graph_c0;c239532.graph_c0;c226144.graph_c0;c228672.graph_c0;c242818.graph_c0;c233842.graph_c0;c215784.graph_c0;c231595.graph_c1;c234020.…
	molecular function	structural molecule activity	GO:0005198	1553	16	c240703.graph_c0;c234408.graph_c0;c193522.graph_c0;c232998.graph_c2;c194608.graph_c0;c230812.graph_c0;c242528.graph_c0;c227104.graph_c0;c230346.graph_c0;c238753.graph_c0;c237468.graph_c0;c223386.graph_c0;c236106.graph_c0;c241418.graph_c3;c222714.graph_c0;c226621.graph_c0
	molecular function	nucleic acid binding transcription factor activity	GO:0001071	730	69	c230930.graph_c0;c231354.graph_c2;c221361.graph_c0;c226101.graph_c0;c221234.graph_c1;c216486.graph_c0;c241706.graph_c0;c225297.graph_c3;c219941.graph_c0;c220684.graph_c0;c241071.graph_c0;c231006.graph_c0;c194487.graph_c0;c212692.graph_c2;c242259.graph_c0;c217683.graph_c0;c243548.graph_c1;c235392.graph_c0;c221234.graph_c0;c219343.graph_c0;c203704.graph_c0;c215731.graph_c0;c242078.graph_c1;c242259.…
	molecular function	electron carrier activity	GO:0009055	475	39	c155775.graph_c0;c214048.graph_c0;c193346.graph_c0;c237283.graph_c2;c234642.graph_c0;c232505.graph_c1;c227072.graph_c0;c235775.graph_c1;c236407.graph_c0;c239787.graph_c1;c211946.graph_c0;c219568.graph_c0;c243080.graph_c1;c242536.graph_c0;c226728.graph_c0;c193960.graph_c0;c69675.graph_c0;c235931.graph_c0;c237931.graph_c0;c225343.graph_c1;c194499.graph_c0;c239917.graph_c0;c209021.graph_c0;c231240.g…
	molecular function	antioxidant activity	GO:0016209	282	32	c238207.graph_c0;c222113.graph_c0;c237176.graph_c0;c242039.graph_c2;c233735.graph_c0;c235465.graph_c0;c231145.graph_c0;c231764.graph_c2;c242166.graph_c0;c219948.graph_c0;c237322.graph_c2;c242260.graph_c0;c217554.graph_c1;c238440.graph_c1;c237676.graph_c0;c70048.graph_c0;c236244.graph_c0;c219948.graph_c1;c225900.graph_c0;c221553.graph_c0;c147857.graph_c0;c243229.graph_c0;c235513.graph_c0;c244337.g…
	molecular function	molecular transducer activity	GO:0060089	243	30	c230605.graph_c0;c190849.graph_c0;c226267.graph_c0;c240113.graph_c1;c241040.graph_c0;c234627.graph_c0;c231558.graph_c1;c230185.graph_c0;c238466.graph_c0;c210117.graph_c0;c234508.graph_c0;c235926.graph_c1;c232465.graph_c1;c211374.graph_c1;c212365.graph_c0;c233061.graph_c0;c236756.graph_c0;c233067.graph_c0;c241964.graph_c1;c213595.graph_c0;c236882.graph_c1;c228724.graph_c0;c243636.graph_c0;c228094.…
	molecular function	signal transducer activity	GO:0004871	243	30	c234508.graph_c0;c210117.graph_c0;c238466.graph_c0;c230185.graph_c0;c231558.graph_c1;c241040.graph_c0;c234627.graph_c0;c232465.graph_c1;c235926.graph_c1;c240113.graph_c1;c226267.graph_c0;c190849.graph_c0;c230605.graph_c0;c227013.graph_c1;c228463.graph_c1;c243636.graph_c0;c228094.graph_c0;c240293.graph_c0;c219803.graph_c0;c243827.graph_c0;c221570.graph_c0;c213595.graph_c0;c241964.graph_c1;c233061.…
	molecular function	transcription factor activity, protein binding	GO:0000988	60	2	c205082.graph_c0;c237722.graph_c1
	molecular function	metallochaperone activity	GO:0016530	18	0
	molecular function	nutrient reservoir activity	GO:0045735	17	4	c235948.graph_c0;c194497.graph_c1;c230464.graph_c1;c229394.graph_c0
	molecular function	protein tag	GO:0031386	6	1	c227740.graph_c0
	molecular function	translation regulator activity	GO:0045182	2	0
12h	biological process	metabolic process	GO:0008152	17262	2026	c225686.graph_c0;c229870.graph_c0;c234132.graph_c0;c226972.graph_c1;c208701.graph_c0;c211789.graph_c0;c203637.graph_c0;c219482.graph_c2;c225144.graph_c0;c222735.graph_c0;c221277.graph_c0;c243007.graph_c0;c205701.graph_c0;c243711.graph_c0;c240164.graph_c0;c213183.graph_c0;c216007.graph_c0;c149355.graph_c0;c219229.graph_c0;c232152.graph_c1;c228463.graph_c1;c241701.graph_c1;c227195.graph_c0;c236834.…
	209530.graph_c0;c194607.graph_c0;c241568.graph_c0;c231566.graph_c0;c232645.graph_c0;c236909.graph_c4;c149390.graph_c0;c243554.graph_c1;c236161.graph_c2;c233919.graph_c0;c239350.graph_c0;c238215.graph_c1;c236906.graph_c0;c172247.graph_c0;c212146.graph_c1;c232014.graph_c0;c240540.graph_c0;c178929.graph_c0;c224512.graph_c0;c183239.graph_c0;c217982.graph_c0;c204183.graph_c0;c155276.graph_c1;c223555.g…
	biological process	cellular process	GO:0009987	15859	1857	c218823.graph_c0;c172251.graph_c0;c242555.graph_c2;c232967.graph_c0;c232173.graph_c2;c233596.graph_c0;c214117.graph_c0;c209361.graph_c0;c242263.graph_c0;c230996.graph_c0;c234586.graph_c0;c232331.graph_c1;c204300.graph_c0;c236251.graph_c0;c232688.graph_c2;c228655.graph_c0;c221794.graph_c0;c237412.graph_c0;c207375.graph_c0;c228986.graph_c0;c218258.graph_c0;c230230.graph_c0;c206868.graph_c0;c215593.…
	biological process	single-organism process	GO:0044699	12284	1630	c208686.graph_c0;c225184.graph_c0;c242967.graph_c1;c215530.graph_c1;c242520.graph_c0;c241212.graph_c0;c216738.graph_c0;c242688.graph_c0;c231835.graph_c0;c218151.graph_c1;c203076.graph_c0;c191387.graph_c0;c208675.graph_c0;c219230.graph_c1;c234808.graph_c0;c242831.graph_c3;c212999.graph_c0;c191522.graph_c0;c231582.graph_c1;c215304.graph_c0;c228724.graph_c0;c220641.graph_c0;c227740.graph_c0;c234856.…
	biological process	localization	GO:0051179	4116	488	c240068.graph_c1;c235833.graph_c0;c216392.graph_c0;c220656.graph_c0;c232023.graph_c1;c222513.graph_c0;c243886.graph_c1;c241384.graph_c1;c70904.graph_c0;c240473.graph_c2;c241265.graph_c0;c242269.graph_c1;c238401.graph_c1;c226388.graph_c0;c228672.graph_c0;c228783.graph_c0;c237055.graph_c0;c214684.graph_c0;c227501.graph_c0;c230161.graph_c0;c219222.graph_c0;c235859.graph_c0;c234020.graph_c3;c237722.g…
	biological process	response to stimulus	GO:0050896	3917	726	c148769.graph_c0;c242573.graph_c0;c243314.graph_c0;c224381.graph_c0;c240535.graph_c1;c227326.graph_c0;c234531.graph_c0;c236131.graph_c3;c244229.graph_c0;c243559.graph_c1;c225469.graph_c2;c227661.graph_c2;c231764.graph_c0;c231734.graph_c0;c240690.graph_c0;c241821.graph_c0;c236068.graph_c0;c226875.graph_c0;c179635.graph_c0;c226296.graph_c0;c217537.graph_c0;c237722.graph_c1;c211942.graph_c0;c219222.…
	biological process	biological regulation	GO:0065007	3911	601	c222062.graph_c0;c201471.graph_c0;c218022.graph_c0;c222219.graph_c0;c203058.graph_c0;c229952.graph_c0;c193588.graph_c1;c226856.graph_c0;c231943.graph_c3;c235926.graph_c1;c241964.graph_c1;c234627.graph_c0;c235264.graph_c1;c240997.graph_c0;c231454.graph_c0;c241309.graph_c1;c240863.graph_c2;c213765.graph_c1;c214726.graph_c0;c241943.graph_c0;c203704.graph_c0;c238409.graph_c0;c233366.graph_c0;c238082.…
	biological process	cellular component organization or biogenesis	GO:0071840	2916	383	c238401.graph_c1;c232924.graph_c0;c203597.graph_c0;c208841.graph_c0;c193066.graph_c1;c235833.graph_c0;c241872.graph_c3;c217537.graph_c0;c223663.graph_c0;c237468.graph_c0;c224520.graph_c0;c214679.graph_c0;c237722.graph_c1;c235859.graph_c0;c234020.graph_c3;c233431.graph_c1;c219222.graph_c0;c214684.graph_c0;c223125.graph_c0;c220200.graph_c0;c240690.graph_c0;c191986.graph_c0;c183202.graph_c0;c224218.…
	biological process	developmental process	GO:0032502	1668	364	c243208.graph_c1;c231766.graph_c0;c152643.graph_c0;c229024.graph_c0;c231073.graph_c0;c223387.graph_c0;c225199.graph_c0;c236076.graph_c1;c66835.graph_c0;c212588.graph_c0;c235926.graph_c2;c226366.graph_c1;c219568.graph_c0;c233336.graph_c2;c223764.graph_c0;c238893.graph_c1;c212890.graph_c0;c234987.graph_c0;c213235.graph_c0;c228687.graph_c0;c230566.graph_c0;c220240.graph_c0;c208686.graph_c1;c235886.g…
	biological process	multicellular organismal process	GO:0032501	1384	333	c237281.graph_c0;c212588.graph_c2;c219493.graph_c1;c235584.graph_c0;c225065.graph_c0;c241395.graph_c0;c229023.graph_c0;c236141.graph_c1;c211410.graph_c0;c207245.graph_c0;c155603.graph_c0;c232225.graph_c0;c238986.graph_c1;c218803.graph_c0;c220015.graph_c0;c227855.graph_c1;c224940.graph_c0;c220138.graph_c0;c231405.graph_c1;c231622.graph_c0;c240655.graph_c0;c243201.graph_c0;c223131.graph_c0;c242892.…
	biological process	signaling	GO:0023052	1158	208	c238379.graph_c0;c243208.graph_c1;c221570.graph_c0;c223332.graph_c1;c212235.graph_c0;c234479.graph_c0;c194347.graph_c0;c232465.graph_c1;c235615.graph_c0;c209285.graph_c0;c237742.graph_c1;c235926.graph_c2;c228724.graph_c1;c226366.graph_c1;c231310.graph_c0;c238957.graph_c1;c228463.graph_c1;c228998.graph_c0;c234041.graph_c4;c224287.graph_c0;c237574.graph_c2;c224199.graph_c0;c237898.graph_c2;c219229.…
	biological process	reproductive process	GO:0022414	807	181	c228368.graph_c0;c238893.graph_c1;c234987.graph_c0;c213235.graph_c0;c215395.graph_c0;c220240.graph_c0;c230566.graph_c0;c231310.graph_c0;c237455.graph_c0;c243404.graph_c1;c219568.graph_c0;c219232.graph_c0;c216007.graph_c0;c225199.graph_c0;c236076.graph_c1;c194598.graph_c0;c220877.graph_c0;c222735.graph_c0;c173914.graph_c0;c212588.graph_c0;c240579.graph_c0;c243208.graph_c1;c221570.graph_c0;c231766.…
	biological process	multi-organism process	GO:0051704	727	150	c230566.graph_c0;c231310.graph_c0;c224287.graph_c0;c237574.graph_c2;c224199.graph_c0;c234041.graph_c4;c219568.graph_c0;c243404.graph_c1;c237898.graph_c2;c227309.graph_c0;c239913.graph_c0;c232086.graph_c2;c220155.graph_c0;c216007.graph_c0;c228059.graph_c0;c173914.graph_c0;c218019.graph_c0;c212588.graph_c0;c243437.graph_c0;c240579.graph_c0;c213596.graph_c1;c243208.graph_c1;c193167.graph_c0;c194002.…
	biological process	growth	GO:0040007	403	95	c77031.graph_c0;c238317.graph_c0;c207158.graph_c0;c229492.graph_c0;c242892.graph_c0;c236152.graph_c0;c238064.graph_c1;c221899.graph_c0;c154808.graph_c0;c230346.graph_c0;c239878.graph_c1;c225817.graph_c0;c219455.graph_c0;c231405.graph_c1;c243826.graph_c0;c229680.graph_c0;c205540.graph_c0;c238042.graph_c0;c219447.graph_c0;c214750.graph_c0;c231622.graph_c0;c232741.graph_c0;c222962.graph_c0;c233930.g…
	biological process	reproduction	GO:0000003	395	44	c227768.graph_c0;c236251.graph_c0;c239665.graph_c1;c148718.graph_c0;c226144.graph_c0;c209518.graph_c0;c233494.graph_c0;c231405.graph_c1;c230797.graph_c0;c236051.graph_c0;c194089.graph_c0;c233428.graph_c0;c240690.graph_c0;c243201.graph_c0;c236152.graph_c0;c212129.graph_c0;c229507.graph_c1;c193040.graph_c0;c225653.graph_c0;c243208.graph_c1;c227501.graph_c0;c231354.graph_c2;c193419.graph_c0;c220641.…
	biological process	immune system process	GO:0002376	224	62	c215304.graph_c0;c227392.graph_c0;c243437.graph_c0;c237742.graph_c1;c215122.graph_c0;c181080.graph_c0;c216091.graph_c0;c230251.graph_c0;c228883.graph_c0;c235394.graph_c0;c194347.graph_c0;c238795.graph_c0;c224696.graph_c0;c220155.graph_c0;c243315.graph_c0;c239913.graph_c0;c231310.graph_c0;c203674.graph_c0;c235346.graph_c0;c242818.graph_c0;c224287.graph_c0;c237574.graph_c2;c228463.graph_c1;c224199.…
	biological process	biological adhesion	GO:0022610	39	5	c233431.graph_c1;c231405.graph_c1;c225065.graph_c0;c231367.graph_c0;c240579.graph_c0
	biological process	biological phase	GO:0044848	34	5	c238082.graph_c2;c216007.graph_c0;c230566.graph_c0;c231405.graph_c1;c147502.graph_c0
	biological process	rhythmic process	GO:0048511	30	6	c223700.graph_c1;c222735.graph_c0;c236196.graph_c2;c211707.graph_c0;c227361.graph_c0;c224912.graph_c0
	biological process	locomotion	GO:0040011	14	4	c240579.graph_c0;c229680.graph_c0;c225965.graph_c0;c173914.graph_c0
	biological process	cell killing	GO:0001906	10	2	c210255.graph_c0;c193167.graph_c0
	cellular component	cell	GO:0005623	12065	1502	c147306.graph_c0;c223767.graph_c2;c237148.graph_c0;c239141.graph_c0;c218251.graph_c0;c230632.graph_c0;c193657.graph_c0;c238064.graph_c1;c225299.graph_c0;c193543.graph_c0;c231798.graph_c2;c242402.graph_c2;c240077.graph_c0;c243080.graph_c1;c240372.graph_c0;c223668.graph_c0;c238992.graph_c3;c213514.graph_c0;c223583.graph_c0;c209807.graph_c0;c184060.graph_c0;c219010.graph_c0;c239684.graph_c2;c234874.…
	cellular component	cell part	GO:0044464	12065	1502	c207226.graph_c0;c193219.graph_c1;c231432.graph_c2;c232156.graph_c0;c230442.graph_c1;c233568.graph_c0;c233930.graph_c0;c230458.graph_c0;c235105.graph_c7;c219018.graph_c1;c239139.graph_c1;c192422.graph_c0;c235030.graph_c1;c213500.graph_c0;c241738.graph_c0;c180678.graph_c1;c231784.graph_c1;c239878.graph_c0;c181080.graph_c0;c221414.graph_c0;c232972.graph_c0;c239972.graph_c0;c209891.graph_c0;c238896.…
	cellular component	organelle	GO:0043226	9174	1155	c235702.graph_c0;c221938.graph_c0;c236686.graph_c0;c201671.graph_c0;c243443.graph_c1;c209196.graph_c0;c204952.graph_c0;c234764.graph_c1;c244363.graph_c0;c228510.graph_c0;c214799.graph_c0;c208626.graph_c0;c233463.graph_c2;c227392.graph_c0;c238744.graph_c2;c232570.graph_c1;c218251.graph_c0;c230632.graph_c0;c238064.graph_c1;c193657.graph_c0;c147306.graph_c0;c223767.graph_c2;c231798.graph_c2;c240077.…
	cellular component	membrane	GO:0016020	5981	789	c212174.graph_c0;c243820.graph_c1;c236466.graph_c0;c231595.graph_c0;c132944.graph_c0;c238503.graph_c0;c233787.graph_c1;c225167.graph_c0;c184036.graph_c0;c236631.graph_c1;c237420.graph_c0;c237949.graph_c3;c221203.graph_c1;c243537.graph_c1;c210106.graph_c0;c230235.graph_c3;c147728.graph_c0;c233401.graph_c0;c207800.graph_c0;c228463.graph_c0;c222755.graph_c0;c229665.graph_c0;c222581.graph_c0;c194639.…
	cellular component	macromolecular complex	GO:0032991	4313	255	c228264.graph_c0;c224499.graph_c0;c174056.graph_c0;c239654.graph_c0;c240077.graph_c0;c228234.graph_c0;c226126.graph_c0;c232183.graph_c0;c192118.graph_c0;c222995.graph_c0;c239438.graph_c0;c219455.graph_c0;c238064.graph_c1;c239003.graph_c0;c229078.graph_c0;c207913.graph_c0;c231373.graph_c0;c219010.graph_c0;c183381.graph_c0;c67351.graph_c0;c183184.graph_c0;c191357.graph_c0;c244026.graph_c0;c210013.g…
	cellular component	organelle part	GO:0044422	3894	416	c225065.graph_c0;c148661.graph_c0;c156868.graph_c0;c219269.graph_c0;c242684.graph_c2;c234545.graph_c0;c212588.graph_c2;c227375.graph_c0;c242484.graph_c0;c242452.graph_c3;c224452.graph_c0;c235826.graph_c0;c190548.graph_c0;c229758.graph_c0;c238871.graph_c0;c239822.graph_c0;c193522.graph_c0;c156849.graph_c0;c218803.graph_c0;c187689.graph_c0;c234056.graph_c0;c218875.graph_c0;c204642.graph_c0;c238051.…
	cellular component	membrane part	GO:0044425	3333	326	c133485.graph_c0;c241136.graph_c1;c213262.graph_c1;c228879.graph_c1;c234320.graph_c0;c235936.graph_c0;c227573.graph_c0;c231971.graph_c0;c208570.graph_c1;c243550.graph_c1;c235502.graph_c2;c239642.graph_c0;c192129.graph_c1;c184617.graph_c1;c220197.graph_c0;c231083.graph_c0;c226218.graph_c0;c241093.graph_c2;c221461.graph_c0;c194385.graph_c0;c221277.graph_c0;c222735.graph_c0;c234181.graph_c0;c233778.…
	cellular component	membrane-enclosed lumen	GO:0031974	903	56	c173890.graph_c0;c227740.graph_c0;c240296.graph_c0;c238795.graph_c0;c225318.graph_c0;c230209.graph_c1;c193712.graph_c0;c220343.graph_c2;c220612.graph_c1;c204464.graph_c0;c209530.graph_c0;c230566.graph_c0;c242191.graph_c5;c220240.graph_c0;c194465.graph_c1;c235105.graph_c7;c229023.graph_c0;c184118.graph_c0;c233464.graph_c0;c228368.graph_c0;c233178.graph_c0;c237529.graph_c1;c239913.graph_c0;c208524.…
	cellular component	extracellular region	GO:0005576	734	126	c183202.graph_c0;c220455.graph_c2;c238110.graph_c0;c229507.graph_c1;c149379.graph_c0;c223530.graph_c2;c222062.graph_c0;c229612.graph_c0;c230996.graph_c0;c230097.graph_c3;c232646.graph_c0;c231449.graph_c0;c242263.graph_c0;c240042.graph_c0;c239825.graph_c0;c214117.graph_c0;c238753.graph_c0;c233327.graph_c0;c209536.graph_c1;c230936.graph_c0;c227756.graph_c0;c194497.graph_c1;c241093.graph_c2;c234131.…
	cellular component	cell junction	GO:0030054	315	59	c235833.graph_c0;c235068.graph_c0;c229147.graph_c0;c218593.graph_c0;c237916.graph_c1;c238679.graph_c1;c217310.graph_c0;c234041.graph_c4;c234891.graph_c1;c208686.graph_c1;c147728.graph_c0;c227921.graph_c1;c209196.graph_c0;c228505.graph_c0;c222638.graph_c0;c239337.graph_c2;c215304.graph_c0;c234545.graph_c0;c193276.graph_c0;c212588.graph_c2;c212588.graph_c0;c233431.graph_c1;c226876.graph_c0;c238744.…
	cellular component	symplast	GO:0055044	314	59	c222687.graph_c0;c226876.graph_c0;c238744.graph_c2;c233431.graph_c1;c212588.graph_c0;c212588.graph_c2;c234545.graph_c0;c193276.graph_c0;c215304.graph_c0;c239337.graph_c2;c222638.graph_c0;c228505.graph_c0;c209196.graph_c0;c227921.graph_c1;c147728.graph_c0;c208686.graph_c1;c234891.graph_c1;c234041.graph_c4;c217310.graph_c0;c238679.graph_c1;c237916.graph_c1;c218593.graph_c0;c229147.graph_c0;c235833.…
	cellular component	nucleoid	GO:0009295	57	6	c223764.graph_c0;c231766.graph_c0;c214845.graph_c0;c236754.graph_c0;c236739.graph_c0;c231073.graph_c0
	cellular component	extracellular region part	GO:0044421	13	2	c235068.graph_c0;c240229.graph_c0
	cellular component	virion	GO:0019012	10	0
	cellular component	virion part	GO:0044423	10	0
	molecular function	catalytic activity	GO:0003824	15424	2053	c221277.graph_c0;c242227.graph_c0;c240164.graph_c0;c243711.graph_c0;c229870.graph_c0;c222002.graph_c0;c233873.graph_c4;c208701.graph_c0;c205392.graph_c0;c216644.graph_c0;c236834.graph_c0;c208804.graph_c0;c243616.graph_c1;c215395.graph_c0;c228496.graph_c4;c243665.graph_c0;c229374.graph_c1;c235237.graph_c3;c232152.graph_c1;c241701.graph_c1;c228463.graph_c1;c208073.graph_c0;c243030.graph_c0;c231262.…
	446.graph_c0;c234917.graph_c0;c232152.graph_c0;c147857.graph_c0;c227300.graph_c0;c241979.graph_c1;c182510.graph_c0;c218491.graph_c0;c191393.graph_c0;c225007.graph_c1;c234845.graph_c1;c241061.graph_c0;c225783.graph_c2;c193906.graph_c0;c240719.graph_c1;c211594.graph_c0;c237857.graph_c0;c208701.graph_c1;c222406.graph_c0;c238893.graph_c1;c233336.graph_c2;c242971.graph_c0;c230396.graph_c0;c219568.grap…
	molecular function	binding	GO:0005488	13436	1661	c236051.graph_c0;c226002.graph_c0;c238821.graph_c1;c148718.graph_c0;c202132.graph_c0;c243292.graph_c0;c223382.graph_c1;c237265.graph_c0;c242890.graph_c0;c242604.graph_c0;c238836.graph_c1;c148705.graph_c0;c203947.graph_c0;c193247.graph_c0;c203347.graph_c1;c210327.graph_c0;c234111.graph_c0;c223500.graph_c0;c178556.graph_c0;c240343.graph_c1;c211441.graph_c1;c237780.graph_c0;c242515.graph_c2;c212103.…
	molecular function	transporter activity	GO:0005215	1862	218	c231971.graph_c0;c243550.graph_c1;c208570.graph_c1;c209843.graph_c0;c239642.graph_c0;c241004.graph_c0;c229438.graph_c1;c236847.graph_c0;c231083.graph_c0;c228013.graph_c1;c221461.graph_c0;c226144.graph_c0;c233409.graph_c1;c238984.graph_c2;c233024.graph_c1;c241136.graph_c1;c243562.graph_c0;c239962.graph_c0;c228879.graph_c1;c226168.graph_c0;c232154.graph_c0;c238497.graph_c2;c233464.graph_c0;c234987.…
	molecular function	structural molecule activity	GO:0005198	1553	84	c224144.graph_c1;c243203.graph_c1;c230346.graph_c0;c231154.graph_c2;c230632.graph_c0;c224499.graph_c0;c230812.graph_c0;c228264.graph_c0;c74228.graph_c0;c240077.graph_c0;c230402.graph_c0;c212853.graph_c0;c208278.graph_c0;c244026.graph_c0;c241418.graph_c3;c182196.graph_c0;c231373.graph_c0;c191357.graph_c0;c67351.graph_c0;c228862.graph_c0;c238889.graph_c2;c189183.graph_c0;c232998.graph_c2;c193522.gr…
	molecular function	nucleic acid binding transcription factor activity	GO:0001071	730	84	c231920.graph_c0;c211707.graph_c0;c192101.graph_c0;c238409.graph_c0;c203704.graph_c0;c213765.graph_c1;c229354.graph_c1;c220684.graph_c0;c231332.graph_c0;c191459.graph_c0;c220155.graph_c0;c221234.graph_c1;c231018.graph_c2;c223387.graph_c0;c211413.graph_c0;c190290.graph_c0;c227543.graph_c0;c173583.graph_c0;c242259.graph_c0;c213305.graph_c1;c241071.graph_c0;c230930.graph_c0;c232122.graph_c0;c203947.…
	molecular function	electron carrier activity	GO:0009055	475	53	c234055.graph_c0;c214048.graph_c0;c241511.graph_c0;c242166.graph_c0;c236645.graph_c3;c232505.graph_c1;c243725.graph_c0;c205598.graph_c0;c194499.graph_c0;c231240.graph_c2;c236672.graph_c0;c240191.graph_c1;c235886.graph_c0;c242924.graph_c2;c224486.graph_c0;c234586.graph_c0;c208675.graph_c0;c220517.graph_c0;c239787.graph_c1;c234642.graph_c0;c243080.graph_c1;c240077.graph_c0;c155775.graph_c0;c220423.…
	molecular function	antioxidant activity	GO:0016209	282	53	c70048.graph_c0;c217554.graph_c1;c220834.graph_c0;c231764.graph_c0;c219948.graph_c0;c237322.graph_c2;c222113.graph_c0;c237188.graph_c0;c219948.graph_c1;c235465.graph_c0;c203347.graph_c1;c215200.graph_c0;c231145.graph_c0;c243229.graph_c0;c238110.graph_c0;c238440.graph_c1;c242254.graph_c2;c241202.graph_c0;c186959.graph_c0;c147857.graph_c0;c231764.graph_c2;c233165.graph_c0;c194512.graph_c0;c224407.g…
	molecular function	molecular transducer activity	GO:0060089	243	38	c233867.graph_c0;c212010.graph_c0;c220033.graph_c0;c228724.graph_c0;c221570.graph_c0;c235926.graph_c2;c234479.graph_c0;c243175.graph_c1;c194088.graph_c0;c232465.graph_c1;c226267.graph_c0;c208841.graph_c0;c238986.graph_c1;c223185.graph_c0;c228463.graph_c1;c223700.graph_c1;c203597.graph_c0;c234332.graph_c0;c228094.graph_c0;c233061.graph_c0;c240293.graph_c0;c234627.graph_c0;c241964.graph_c1;c227013.…
	molecular function	signal transducer activity	GO:0004871	243	38	c243789.graph_c0;c154808.graph_c0;c238539.graph_c0;c240113.graph_c1;c243827.graph_c0;c237160.graph_c1;c234627.graph_c0;c241964.graph_c1;c227013.graph_c1;c239962.graph_c0;c203060.graph_c0;c212365.graph_c0;c232918.graph_c1;c243636.graph_c0;c235926.graph_c1;c228986.graph_c0;c233494.graph_c0;c226267.graph_c0;c208841.graph_c0;c223185.graph_c0;c238986.graph_c1;c228463.graph_c1;c223700.graph_c1;c203597.…
	molecular function	transcription factor activity, protein binding	GO:0000988	60	3	c237722.graph_c1;c205082.graph_c0;c225537.graph_c0
	molecular function	metallochaperone activity	GO:0016530	18	1	c238401.graph_c1
	molecular function	nutrient reservoir activity	GO:0045735	17	5	c229394.graph_c0;c230464.graph_c1;c235948.graph_c0;c213749.graph_c1;c194497.graph_c1
	molecular function	protein tag	GO:0031386	6	1	c227740.graph_c0
	molecular function	translation regulator activity	GO:0045182	2	1	c227392.graph_c0
24h	biological process	metabolic process	GO:0008152	17262	805	c172251.graph_c0;c243554.graph_c1;c221507.graph_c0;c213481.graph_c0;c224527.graph_c1;c182551.graph_c0;c222109.graph_c0;c194129.graph_c0;c212588.graph_c1;c221370.graph_c0;c213075.graph_c1;c227270.graph_c1;c240511.graph_c2;c229093.graph_c0;c234336.graph_c0;c226343.graph_c0;c193300.graph_c0;c239799.graph_c0;c242557.graph_c1;c72985.graph_c0;c215280.graph_c1;c224302.graph_c1;c243264.graph_c1;c212658.g…
	biological process	cellular process	GO:0009987	15859	722	c193747.graph_c0;c235024.graph_c0;c222971.graph_c0;c227474.graph_c1;c230970.graph_c0;c203030.graph_c0;c239755.graph_c0;c242030.graph_c1;c193817.graph_c0;c212588.graph_c2;c223307.graph_c0;c218943.graph_c0;c237568.graph_c1;c227060.graph_c1;c222926.graph_c0;c232844.graph_c0;c240795.graph_c0;c235708.graph_c0;c224044.graph_c0;c235121.graph_c3;c236403.graph_c0;c233267.graph_c0;c227413.graph_c0;c238679.…
	biological process	single-organism process	GO:0044699	12284	713	c237381.graph_c2;c215379.graph_c0;c233634.graph_c1;c237722.graph_c1;c237289.graph_c1;c223235.graph_c0;c233463.graph_c2;c221869.graph_c0;c207325.graph_c1;c240407.graph_c1;c204717.graph_c1;c204895.graph_c1;c230178.graph_c1;c240521.graph_c0;c242074.graph_c0;c238753.graph_c0;c214616.graph_c0;c232505.graph_c0;c207375.graph_c0;c221386.graph_c0;c215481.graph_c0;c214658.graph_c0;c183516.graph_c0;c215546.…
	biological process	localization	GO:0051179	4116	209	c230480.graph_c0;c190043.graph_c0;c234390.graph_c0;c243562.graph_c0;c217493.graph_c4;c241893.graph_c0;c230379.graph_c3;c227573.graph_c0;c229384.graph_c1;c238871.graph_c0;c233857.graph_c1;c234223.graph_c2;c237793.graph_c3;c221461.graph_c0;c240565.graph_c0;c229376.graph_c0;c243201.graph_c0;c242520.graph_c0;c232519.graph_c0;c148668.graph_c0;c237416.graph_c3;c212588.graph_c0;c148577.graph_c0;c242269.…
	biological process	response to stimulus	GO:0050896	3917	315	c236244.graph_c0;c242484.graph_c0;c209242.graph_c0;c151418.graph_c0;c151229.graph_c0;c216091.graph_c0;c230220.graph_c0;c220630.graph_c0;c224199.graph_c0;c242616.graph_c0;c217493.graph_c2;c232645.graph_c0;c241004.graph_c0;c241514.graph_c0;c236051.graph_c0;c215165.graph_c0;c211882.graph_c0;c194465.graph_c1;c231585.graph_c1;c231354.graph_c2;c234466.graph_c0;c222106.graph_c0;c194598.graph_c0;c194844.…
	biological process	biological regulation	GO:0065007	3911	240	c183303.graph_c1;c149390.graph_c0;c221882.graph_c1;c233431.graph_c1;c233902.graph_c0;c224397.graph_c0;c243082.graph_c1;c192498.graph_c0;c227413.graph_c0;c213765.graph_c1;c232513.graph_c1;c236403.graph_c0;c181044.graph_c0;c202899.graph_c0;c241323.graph_c4;c211481.graph_c0;c240795.graph_c0;c236196.graph_c2;c243266.graph_c1;c156849.graph_c0;c207234.graph_c0;c187689.graph_c0;c240293.graph_c0;c232844.…
	biological process	cellular component organization or biogenesis	GO:0071840	2916	144	c151416.graph_c0;c223387.graph_c0;c229918.graph_c1;c235024.graph_c0;c193747.graph_c0;c149595.graph_c0;c203030.graph_c0;c204183.graph_c0;c240556.graph_c1;c205443.graph_c1;c241622.graph_c0;c240863.graph_c2;c218943.graph_c0;c237568.graph_c1;c223307.graph_c0;c215802.graph_c0;c216807.graph_c0;c182444.graph_c0;c226203.graph_c0;c240795.graph_c0;c230685.graph_c0;c241323.graph_c4;c211481.graph_c0;c230822.…
	biological process	developmental process	GO:0032502	1668	150	c173914.graph_c0;c234390.graph_c0;c228234.graph_c0;c220968.graph_c0;c237751.graph_c0;c226637.graph_c0;c243201.graph_c0;c214750.graph_c0;c183202.graph_c0;c239386.graph_c2;c212588.graph_c0;c234853.graph_c0;c226927.graph_c0;c187428.graph_c0;c229680.graph_c0;c231766.graph_c0;c219994.graph_c0;c240655.graph_c0;c236051.graph_c0;c241514.graph_c0;c232080.graph_c2;c211882.graph_c0;c194465.graph_c1;c194598.…
	biological process	multicellular organismal process	GO:0032501	1384	140	c214616.graph_c0;c231196.graph_c0;c204895.graph_c1;c183516.graph_c0;c234987.graph_c0;c224218.graph_c0;c225381.graph_c0;c237780.graph_c0;c215481.graph_c0;c207375.graph_c0;c217263.graph_c0;c243750.graph_c0;c227218.graph_c0;c236013.graph_c0;c181173.graph_c0;c230870.graph_c0;c234020.graph_c3;c221869.graph_c0;c203060.graph_c1;c233463.graph_c2;c225065.graph_c0;c212129.graph_c0;c218022.graph_c0;c224940.…
	biological process	signaling	GO:0023052	1158	73	c152145.graph_c0;c234897.graph_c1;c237525.graph_c1;c226366.graph_c1;c210117.graph_c0;c203060.graph_c0;c243175.graph_c1;c235993.graph_c0;c231623.graph_c0;c217496.graph_c0;c237742.graph_c1;c233671.graph_c0;c205534.graph_c1;c236196.graph_c2;c156849.graph_c0;c209144.graph_c0;c240293.graph_c0;c232844.graph_c0;c221225.graph_c0;c220297.graph_c0;c228687.graph_c0;c229264.graph_c0;c233463.graph_c2;c237077.…
	biological process	reproductive process	GO:0022414	807	76	c230870.graph_c0;c181173.graph_c0;c243750.graph_c0;c231481.graph_c3;c233463.graph_c2;c203060.graph_c1;c221869.graph_c0;c220548.graph_c0;c223307.graph_c0;c239665.graph_c1;c204895.graph_c1;c212588.graph_c2;c235800.graph_c0;c230970.graph_c0;c207375.graph_c0;c205443.graph_c1;c182748.graph_c0;c215481.graph_c0;c231798.graph_c2;c237780.graph_c0;c224218.graph_c0;c243427.graph_c0;c234987.graph_c0;c183516.…
	biological process	multi-organism process	GO:0051704	727	71	c243826.graph_c0;c242944.graph_c0;c224199.graph_c0;c216091.graph_c0;c238064.graph_c1;c231585.graph_c1;c241004.graph_c0;c232645.graph_c0;c216457.graph_c0;c236051.graph_c0;c215304.graph_c0;c226856.graph_c0;c228300.graph_c0;c240579.graph_c0;c243749.graph_c0;c214750.graph_c0;c243201.graph_c0;c229680.graph_c0;c215839.graph_c0;c228897.graph_c2;c212588.graph_c0;c194357.graph_c0;c226824.graph_c0;c228640.…
	biological process	growth	GO:0040007	403	36	c220629.graph_c0;c215239.graph_c1;c228300.graph_c0;c233431.graph_c1;c233336.graph_c2;c235600.graph_c1;c228687.graph_c0;c132944.graph_c0;c228914.graph_c0;c229492.graph_c0;c237949.graph_c3;c238064.graph_c1;c207158.graph_c0;c240042.graph_c0;c228527.graph_c0;c222062.graph_c0;c239642.graph_c0;c236564.graph_c1;c243826.graph_c0;c181085.graph_c0;c229492.graph_c1;c237281.graph_c0;c207375.graph_c0;c205540.…
	biological process	reproduction	GO:0000003	395	13	c212129.graph_c0;c233494.graph_c0;c231354.graph_c2;c173914.graph_c0;c236051.graph_c0;c239665.graph_c1;c243201.graph_c0;c222716.graph_c0;c237887.graph_c0;c219344.graph_c0;c223573.graph_c0;c220630.graph_c0;c228999.graph_c0
	biological process	immune system process	GO:0002376	224	24	c224696.graph_c0;c236131.graph_c3;c215429.graph_c0;c220304.graph_c0;c228267.graph_c1;c224940.graph_c0;c231310.graph_c0;c226856.graph_c0;c236044.graph_c0;c236051.graph_c0;c215304.graph_c0;c240863.graph_c2;c224199.graph_c0;c232565.graph_c0;c223307.graph_c0;c223131.graph_c0;c234897.graph_c1;c216091.graph_c0;c242818.graph_c0;c228897.graph_c2;c237742.graph_c1;c224235.graph_c0;c181173.graph_c0;c231623.…
	biological process	biological adhesion	GO:0022610	39	4	c233431.graph_c1;c236013.graph_c0;c240579.graph_c0;c225065.graph_c0
	biological process	biological phase	GO:0044848	34	0
	biological process	rhythmic process	GO:0048511	30	3	c236196.graph_c2;c227311.graph_c0;c224912.graph_c0
	biological process	locomotion	GO:0040011	14	3	c173914.graph_c0;c229680.graph_c0;c240579.graph_c0
	biological process	cell killing	GO:0001906	10	1	c193167.graph_c0
	cellular component	cell	GO:0005623	12065	589	c240407.graph_c1;c207325.graph_c1;c240743.graph_c3;c233463.graph_c2;c218201.graph_c0;c237722.graph_c1;c222269.graph_c0;c237289.graph_c1;c215379.graph_c0;c214658.graph_c0;c232817.graph_c0;c183516.graph_c0;c221386.graph_c0;c207375.graph_c0;c215481.graph_c0;c214616.graph_c0;c232505.graph_c0;c230178.graph_c1;c238753.graph_c0;c234823.graph_c0;c240042.graph_c0;c207158.graph_c0;c208752.graph_c0;c235702.…
	cellular component	cell part	GO:0044464	12065	589	c229595.graph_c0;c234355.graph_c0;c239932.graph_c0;c223617.graph_c0;c226274.graph_c0;c240445.graph_c0;c222842.graph_c0;c233372.graph_c2;c231354.graph_c2;c194598.graph_c0;c194192.graph_c0;c211882.graph_c0;c219994.graph_c0;c231766.graph_c0;c230435.graph_c0;c113098.graph_c0;c230220.graph_c0;c151418.graph_c0;c229758.graph_c0;c221949.graph_c0;c220304.graph_c0;c236961.graph_c0;c223389.graph_c1;c204063.…
	cellular component	organelle	GO:0043226	9174	456	c239824.graph_c2;c231310.graph_c0;c238744.graph_c2;c232429.graph_c0;c127638.graph_c0;c239587.graph_c0;c177571.graph_c0;c239903.graph_c1;c220057.graph_c1;c242639.graph_c1;c233494.graph_c0;c237456.graph_c2;c243217.graph_c0;c211325.graph_c0;c243616.graph_c1;c237605.graph_c0;c230096.graph_c0;c212692.graph_c2;c221813.graph_c0;c212853.graph_c0;c239113.graph_c0;c238679.graph_c1;c204642.graph_c0;c228059.…
	cellular component	membrane	GO:0016020	5981	351	c203060.graph_c0;c240042.graph_c0;c207158.graph_c0;c227583.graph_c0;c228914.graph_c0;c194759.graph_c0;c201741.graph_c0;c132944.graph_c0;c229023.graph_c0;c226468.graph_c0;c233671.graph_c0;c229923.graph_c1;c193868.graph_c0;c239642.graph_c0;c241338.graph_c1;c208603.graph_c0;c238575.graph_c1;c243504.graph_c0;c212129.graph_c0;c243036.graph_c2;c192129.graph_c0;c228496.graph_c4;c233787.graph_c1;c213167.…
	cellular component	macromolecular complex	GO:0032991	4313	69	c212853.graph_c0;c204642.graph_c0;c239386.graph_c2;c232519.graph_c0;c237654.graph_c0;c222219.graph_c0;c231752.graph_c0;c228234.graph_c0;c212284.graph_c0;c211492.graph_c0;c220968.graph_c0;c74015.graph_c0;c221820.graph_c0;c229758.graph_c0;c240335.graph_c4;c186888.graph_c0;c226296.graph_c0;c182815.graph_c0;c238064.graph_c1;c193300.graph_c0;c224912.graph_c0;c229718.graph_c1;c219994.graph_c0;c215304.g…
	cellular component	organelle part	GO:0044422	3894	187	c224452.graph_c0;c194490.graph_c0;c234390.graph_c0;c228234.graph_c0;c212284.graph_c0;c241327.graph_c1;c238871.graph_c0;c220968.graph_c0;c74015.graph_c0;c233857.graph_c1;c220304.graph_c0;c237961.graph_c1;c221820.graph_c0;c229758.graph_c0;c240565.graph_c0;c229376.graph_c0;c239386.graph_c2;c148668.graph_c0;c194357.graph_c0;c212588.graph_c0;c90749.graph_c0;c182030.graph_c0;c231766.graph_c0;c229718.gr…
	cellular component	membrane part	GO:0044425	3333	151	c182444.graph_c0;c240692.graph_c1;c232812.graph_c5;c229102.graph_c0;c223307.graph_c0;c243034.graph_c1;c236300.graph_c0;c216807.graph_c0;c236631.graph_c1;c242818.graph_c0;c218533.graph_c0;c79113.graph_c0;c228879.graph_c1;c242452.graph_c3;c193747.graph_c0;c243372.graph_c1;c240556.graph_c1;c211437.graph_c0;c243494.graph_c1;c219723.graph_c3;c221926.graph_c1;c209984.graph_c0;c239573.graph_c0;c216445.g…
	cellular component	membrane-enclosed lumen	GO:0031974	903	9	c238064.graph_c1;c182030.graph_c0;c223131.graph_c0;c193945.graph_c0;c217682.graph_c1;c219359.graph_c2;c194465.graph_c1;c233178.graph_c0;c229023.graph_c0
	cellular component	extracellular region	GO:0005576	734	67	c215304.graph_c0;c216457.graph_c0;c226856.graph_c0;c212365.graph_c0;c230464.graph_c1;c233372.graph_c2;c241002.graph_c1;c231585.graph_c1;c156775.graph_c0;c215239.graph_c1;c222716.graph_c0;c236564.graph_c1;c242484.graph_c0;c225458.graph_c1;c232723.graph_c3;c173730.graph_c0;c234390.graph_c0;c240113.graph_c2;c190032.graph_c1;c172247.graph_c0;c211492.graph_c0;c216296.graph_c0;c147292.graph_c0;c233327.…
	cellular component	cell junction	GO:0030054	315	24	c207375.graph_c0;c220629.graph_c0;c181044.graph_c0;c235833.graph_c0;c241323.graph_c4;c224940.graph_c0;c212365.graph_c0;c228267.graph_c1;c212588.graph_c2;c233431.graph_c1;c216457.graph_c0;c234390.graph_c0;c215304.graph_c0;c238753.graph_c0;c226856.graph_c0;c238744.graph_c2;c240042.graph_c0;c207158.graph_c0;c242125.graph_c1;c243550.graph_c1;c212588.graph_c0;c187128.graph_c0;c222687.graph_c0;c238679.…
	cellular component	symplast	GO:0055044	314	24	c238679.graph_c1;c187128.graph_c0;c222687.graph_c0;c212588.graph_c0;c242125.graph_c1;c243550.graph_c1;c207158.graph_c0;c240042.graph_c0;c226856.graph_c0;c238744.graph_c2;c238753.graph_c0;c233431.graph_c1;c212588.graph_c2;c216457.graph_c0;c234390.graph_c0;c215304.graph_c0;c228267.graph_c1;c224940.graph_c0;c212365.graph_c0;c235833.graph_c0;c241323.graph_c4;c220629.graph_c0;c207375.graph_c0;c181044.…
	cellular component	nucleoid	GO:0009295	57	2	c225381.graph_c0;c231766.graph_c0
	cellular component	extracellular region part	GO:0044421	13	0
	cellular component	virion	GO:0019012	10	0
	cellular component	virion part	GO:0044423	10	0
	molecular function	catalytic activity	GO:0003824	15424	877	c212044.graph_c0;c213087.graph_c0;c239296.graph_c3;c232152.graph_c0;c235375.graph_c0;c227474.graph_c0;c226296.graph_c0;c229682.graph_c0;c73214.graph_c0;c217982.graph_c0;c219493.graph_c1;c234917.graph_c0;c194663.graph_c0;c236582.graph_c2;c225162.graph_c1;c225478.graph_c0;c235067.graph_c0;c238920.graph_c0;c219228.graph_c0;c214730.graph_c3;c219230.graph_c1;c239917.graph_c0;c222219.graph_c0;c243210.g…
	molecular function	binding	GO:0005488	13436	625	c232023.graph_c1;c239686.graph_c0;c231117.graph_c0;c211413.graph_c0;c224355.graph_c0;c243977.graph_c0;c237463.graph_c3;c242246.graph_c0;c154450.graph_c0;c209571.graph_c0;c243843.graph_c0;c182815.graph_c0;c227096.graph_c0;c230464.graph_c0;c235055.graph_c0;c240707.graph_c0;c221140.graph_c0;c238064.graph_c1;c205392.graph_c0;c236650.graph_c0;c243367.graph_c0;c240599.graph_c0;c194655.graph_c0;c217946.…
	molecular function	transporter activity	GO:0005215	1862	98	c243427.graph_c0;c235758.graph_c0;c204155.graph_c0;c235024.graph_c0;c234987.graph_c0;c232154.graph_c0;c222513.graph_c0;c193631.graph_c0;c212463.graph_c0;c214054.graph_c0;c217263.graph_c0;c232366.graph_c1;c231196.graph_c0;c228335.graph_c0;c228879.graph_c1;c234020.graph_c3;c229438.graph_c1;c220856.graph_c0;c207325.graph_c1;c242818.graph_c0;c218533.graph_c0;c236631.graph_c1;c237077.graph_c1;c236300.…
	molecular function	structural molecule activity	GO:0005198	1553	11	c212853.graph_c0;c238753.graph_c0;c191986.graph_c0;c215601.graph_c0;c215802.graph_c0;c230506.graph_c0;c241418.graph_c3;c230402.graph_c0;c226621.graph_c0;c208752.graph_c0;c223617.graph_c0
	molecular function	nucleic acid binding transcription factor activity	GO:0001071	730	32	c213712.graph_c0;c231196.graph_c0;c204895.graph_c1;c215759.graph_c0;c223387.graph_c0;c212692.graph_c2;c229758.graph_c0;c237751.graph_c0;c211325.graph_c0;c218584.graph_c0;c240932.graph_c0;c226637.graph_c0;c240950.graph_c0;c243548.graph_c1;c222069.graph_c1;c231354.graph_c2;c213765.graph_c1;c219343.graph_c0;c231920.graph_c0;c221882.graph_c1;c240655.graph_c0;c236196.graph_c2;c211413.graph_c0;c205534.…
	molecular function	electron carrier activity	GO:0009055	475	24	c236132.graph_c2;c182748.graph_c0;c193001.graph_c0;c231240.graph_c2;c227072.graph_c0;c215735.graph_c0;c228496.graph_c4;c232505.graph_c0;c232471.graph_c0;c228914.graph_c0;c204717.graph_c1;c224148.graph_c0;c239917.graph_c0;c211946.graph_c0;c236672.graph_c0;c242166.graph_c0;c236645.graph_c3;c232370.graph_c0;c237283.graph_c2;c242924.graph_c2;c237931.graph_c0;c205157.graph_c0;c230936.graph_c0;c243080.…
	molecular function	antioxidant activity	GO:0016209	282	31	c236244.graph_c0;c242166.graph_c0;c215379.graph_c0;c241202.graph_c0;c238440.graph_c2;c242254.graph_c2;c237676.graph_c0;c151229.graph_c0;c225900.graph_c0;c241932.graph_c0;c244337.graph_c0;c235465.graph_c0;c238945.graph_c1;c147857.graph_c0;c241621.graph_c3;c194655.graph_c0;c238440.graph_c1;c203347.graph_c1;c238110.graph_c0;c237176.graph_c0;c219948.graph_c1;c231585.graph_c1;c219948.graph_c0;c222113.…
	molecular function	molecular transducer activity	GO:0060089	243	10	c234627.graph_c0;c193747.graph_c0;c240293.graph_c0;c210117.graph_c0;c203060.graph_c0;c213595.graph_c0;c233494.graph_c0;c212365.graph_c0;c243175.graph_c1;c242389.graph_c2
	molecular function	signal transducer activity	GO:0004871	243	10	c243175.graph_c1;c242389.graph_c2;c212365.graph_c0;c233494.graph_c0;c213595.graph_c0;c234627.graph_c0;c203060.graph_c0;c210117.graph_c0;c240293.graph_c0;c193747.graph_c0
	molecular function	transcription factor activity, protein binding	GO:0000988	60	1	c237722.graph_c1
	molecular function	metallochaperone activity	GO:0016530	18	0
	molecular function	nutrient reservoir activity	GO:0045735	17	2	c230464.graph_c1;c229394.graph_c0
	molecular function	protein tag	GO:0031386	6	0
	molecular function	translation regulator activity	GO:0045182	2	0
5d	biological process	metabolic process	GO:0008152	17262	45	c204486.graph_c0;c72113.graph_c0;c228168.graph_c1;c217722.graph_c0;c67498.graph_c0;c215973.graph_c0;c193355.graph_c0;c74570.graph_c0;c201677.graph_c0;c73625.graph_c0;c155921.graph_c0;c67878.graph_c0;c244707.graph_c0;c211937.graph_c0;c216569.graph_c0;c71636.graph_c0;c240152.graph_c0;c231363.graph_c0;c188484.graph_c0;c243988.graph_c0;c151959.graph_c0;c218053.graph_c0;c244007.graph_c0;c213777.graph_…
	biological process	cellular process	GO:0009987	15859	42	c227669.graph_c0;c223140.graph_c0;c204213.graph_c0;c243915.graph_c0;c215892.graph_c0;c232534.graph_c0;c194276.graph_c1;c213642.graph_c0;c151959.graph_c0;c218053.graph_c0;c240681.graph_c0;c244007.graph_c0;c214181.graph_c0;c213777.graph_c0;c67014.graph_c0;c231707.graph_c0;c243744.graph_c0;c213775.graph_c0;c233660.graph_c0;c201793.graph_c0;c149999.graph_c0;c71886.graph_c0;c193355.graph_c0;c74570.gra…
	biological process	single-organism process	GO:0044699	12284	33	c227669.graph_c0;c223140.graph_c0;c204213.graph_c0;c215892.graph_c0;c232534.graph_c0;c212588.graph_c1;c208291.graph_c0;c218053.graph_c0;c151959.graph_c0;c214181.graph_c0;c244007.graph_c0;c213777.graph_c0;c237176.graph_c0;c233660.graph_c0;c149999.graph_c0;c201793.graph_c0;c68180.graph_c0;c74570.graph_c0;c193355.graph_c0;c215973.graph_c0;c72113.graph_c0;c228168.graph_c1;c217722.graph_c0;c67498.grap…
	biological process	localization	GO:0051179	4116	8	c214181.graph_c0;c213777.graph_c0;c149999.graph_c0;c218053.graph_c0;c222100.graph_c0;c72113.graph_c0;c204213.graph_c0;c223140.graph_c0
	biological process	response to stimulus	GO:0050896	3917	11	c149999.graph_c0;c180755.graph_c0;c151959.graph_c0;c208291.graph_c0;c72113.graph_c0;c231707.graph_c0;c232534.graph_c0;c212588.graph_c1;c211937.graph_c0;c215973.graph_c0;c237176.graph_c0
	biological process	biological regulation	GO:0065007	3911	4	c211937.graph_c0;c151959.graph_c0;c149999.graph_c0;c180755.graph_c0
	biological process	cellular component organization or biogenesis	GO:0071840	2916	6	c151959.graph_c0;c243915.graph_c0;c149999.graph_c0;c72113.graph_c0;c213775.graph_c0;c243902.graph_c0
	biological process	developmental process	GO:0032502	1668	5	c67878.graph_c0;c215973.graph_c0;c151959.graph_c0;c211937.graph_c0;c149999.graph_c0
	biological process	multicellular organismal process	GO:0032501	1384	5	c67878.graph_c0;c149999.graph_c0;c151959.graph_c0;c211937.graph_c0;c215973.graph_c0
	biological process	signaling	GO:0023052	1158	3	c211937.graph_c0;c151959.graph_c0;c180755.graph_c0
	biological process	reproductive process	GO:0022414	807	5	c215973.graph_c0;c211937.graph_c0;c151959.graph_c0;c149999.graph_c0;c67878.graph_c0
	biological process	multi-organism process	GO:0051704	727	4	c72113.graph_c0;c149999.graph_c0;c211937.graph_c0;c215973.graph_c0
	biological process	growth	GO:0040007	403	0
	biological process	reproduction	GO:0000003	395	2	c151959.graph_c0;c67878.graph_c0
	biological process	immune system process	GO:0002376	224	0
	biological process	biological adhesion	GO:0022610	39	0
	biological process	biological phase	GO:0044848	34	0
	biological process	rhythmic process	GO:0048511	30	0
	biological process	locomotion	GO:0040011	14	0
	biological process	cell killing	GO:0001906	10	0
	cellular component	cell	GO:0005623	12065	40	c243915.graph_c0;c192362.graph_c0;c212588.graph_c1;c232534.graph_c0;c215892.graph_c0;c227669.graph_c0;c192495.graph_c0;c204213.graph_c0;c151959.graph_c0;c218053.graph_c0;c244007.graph_c0;c214181.graph_c0;c193991.graph_c0;c213777.graph_c0;c213642.graph_c0;c243902.graph_c0;c71886.graph_c0;c149999.graph_c0;c233660.graph_c0;c213775.graph_c0;c215973.graph_c0;c193355.graph_c0;c74570.graph_c0;c203390.gr…
	cellular component	cell part	GO:0044464	12065	40	c233660.graph_c0;c213775.graph_c0;c71886.graph_c0;c149999.graph_c0;c213642.graph_c0;c243902.graph_c0;c218053.graph_c0;c151959.graph_c0;c244007.graph_c0;c214181.graph_c0;c193991.graph_c0;c213777.graph_c0;c192495.graph_c0;c227669.graph_c0;c204213.graph_c0;c243915.graph_c0;c192362.graph_c0;c212588.graph_c1;c215892.graph_c0;c232534.graph_c0;c67878.graph_c0;c155921.graph_c0;c149020.graph_c0;c205210.gr…
	cellular component	organelle	GO:0043226	9174	30	c149020.graph_c0;c213775.graph_c0;c155921.graph_c0;c233660.graph_c0;c67878.graph_c0;c149999.graph_c0;c73625.graph_c0;c71886.graph_c0;c240152.graph_c0;c188484.graph_c0;c231363.graph_c0;c211937.graph_c0;c72113.graph_c0;c217722.graph_c0;c243902.graph_c0;c213642.graph_c0;c67498.graph_c0;c151959.graph_c0;c244007.graph_c0;c214181.graph_c0;c193991.graph_c0;c213777.graph_c0;c204486.graph_c0;c74570.graph_…
	cellular component	membrane	GO:0016020	5981	22	c222100.graph_c0;c213642.graph_c0;c67498.graph_c0;c217722.graph_c0;c244122.graph_c0;c244007.graph_c0;c214181.graph_c0;c213777.graph_c0;c151959.graph_c0;c218053.graph_c0;c204213.graph_c0;c223140.graph_c0;c193355.graph_c0;c232534.graph_c0;c215973.graph_c0;c233660.graph_c0;c149020.graph_c0;c149999.graph_c0;c215843.graph_c0;c243988.graph_c0;c231363.graph_c0;c211937.graph_c0
	cellular component	macromolecular complex	GO:0032991	4313	21	c181344.graph_c0;c188484.graph_c0;c231363.graph_c0;c71886.graph_c0;c149999.graph_c0;c213775.graph_c0;c155921.graph_c0;c215892.graph_c0;c232534.graph_c0;c243915.graph_c0;c204213.graph_c0;c223140.graph_c0;c74570.graph_c0;c193355.graph_c0;c204486.graph_c0;c193991.graph_c0;c218053.graph_c0;c151959.graph_c0;c222100.graph_c0;c213642.graph_c0;c243902.graph_c0
	cellular component	organelle part	GO:0044422	3894	13	c214181.graph_c0;c213777.graph_c0;c149999.graph_c0;c151959.graph_c0;c213642.graph_c0;c67498.graph_c0;c232534.graph_c0;c211937.graph_c0;c243915.graph_c0;c204213.graph_c0;c193355.graph_c0;c188484.graph_c0;c231363.graph_c0
	cellular component	membrane part	GO:0044425	3333	11	c67498.graph_c0;c222100.graph_c0;c149020.graph_c0;c233660.graph_c0;c214181.graph_c0;c213777.graph_c0;c244007.graph_c0;c218053.graph_c0;c204213.graph_c0;c223140.graph_c0;c231363.graph_c0
	cellular component	membrane-enclosed lumen	GO:0031974	903	2	c193355.graph_c0;c213642.graph_c0
	cellular component	extracellular region	GO:0005576	734	5	c232534.graph_c0;c149999.graph_c0;c215973.graph_c0;c72113.graph_c0;c240152.graph_c0
	cellular component	cell junction	GO:0030054	315	2	c72113.graph_c0;c193355.graph_c0
	cellular component	symplast	GO:0055044	314	2	c72113.graph_c0;c193355.graph_c0
	cellular component	nucleoid	GO:0009295	57	0
	cellular component	extracellular region part	GO:0044421	13	1	c215973.graph_c0
	cellular component	virion	GO:0019012	10	0
	cellular component	virion part	GO:0044423	10	0
	molecular function	catalytic activity	GO:0003824	15424	41	c67498.graph_c0;c222100.graph_c0;c217722.graph_c0;c228168.graph_c1;c72113.graph_c0;c215973.graph_c0;c244004.graph_c0;c74570.graph_c0;c73625.graph_c0;c201677.graph_c0;c204045.graph_c0;c209014.graph_c1;c67878.graph_c0;c149020.graph_c0;c71636.graph_c0;c216569.graph_c0;c211937.graph_c0;c243988.graph_c0;c240200.graph_c1;c240152.graph_c0;c213777.graph_c0;c244007.graph_c0;c218053.graph_c0;c208291.graph_…
	molecular function	binding	GO:0005488	13436	31	c213777.graph_c0;c180755.graph_c0;c244007.graph_c0;c240681.graph_c0;c218053.graph_c0;c151959.graph_c0;c67498.graph_c0;c208291.graph_c0;c72113.graph_c0;c228168.graph_c1;c215892.graph_c0;c232534.graph_c0;c191932.graph_c0;c204213.graph_c0;c193355.graph_c0;c227669.graph_c0;c223140.graph_c0;c201677.graph_c0;c204045.graph_c0;c68180.graph_c0;c209014.graph_c1;c243744.graph_c0;c149020.graph_c0;c231707.gra…
	molecular function	transporter activity	GO:0005215	1862	8	c223140.graph_c0;c204213.graph_c0;c218053.graph_c0;c213777.graph_c0;c204045.graph_c0;c214181.graph_c0;c222100.graph_c0;c67498.graph_c0
	molecular function	structural molecule activity	GO:0005198	1553	8	c193355.graph_c0;c188484.graph_c0;c243915.graph_c0;c213642.graph_c0;c155921.graph_c0;c213775.graph_c0;c71886.graph_c0;c204486.graph_c0
	molecular function	nucleic acid binding transcription factor activity	GO:0001071	730	0
	molecular function	electron carrier activity	GO:0009055	475	2	c67498.graph_c0;c213777.graph_c0
	molecular function	antioxidant activity	GO:0016209	282	2	c237176.graph_c0;c208291.graph_c0
	molecular function	molecular transducer activity	GO:0060089	243	0
	molecular function	signal transducer activity	GO:0004871	243	0
	molecular function	transcription factor activity, protein binding	GO:0000988	60	0
	molecular function	metallochaperone activity	GO:0016530	18	0
	molecular function	nutrient reservoir activity	GO:0045735	17	0
	molecular function	protein tag	GO:0031386	6	0
	molecular function	translation regulator activity	GO:0045182	2	0
15d	biological process	metabolic process	GO:0008152	17262	47	c235758.graph_c1;c226029.graph_c0;c194374.graph_c1;c242604.graph_c0;c235392.graph_c0;c229674.graph_c0;c225900.graph_c0;c224218.graph_c0;c243977.graph_c0;c242074.graph_c0;c231061.graph_c0;c201947.graph_c0;c239878.graph_c1;c231427.graph_c1;c237293.graph_c0;c237945.graph_c0;c232513.graph_c1;c231310.graph_c0;c242185.graph_c0;c233336.graph_c2;c239377.graph_c0;c239477.graph_c0;c213294.graph_c1;c212588.…
	biological process	cellular process	GO:0009987	15859	31	c239878.graph_c1;c242026.graph_c0;c242484.graph_c0;c237331.graph_c6;c231061.graph_c0;c239838.graph_c1;c244808.graph_c0;c224218.graph_c0;c243977.graph_c0;c236633.graph_c0;c194374.graph_c0;c241754.graph_c1;c231310.graph_c0;c237368.graph_c2;c232513.graph_c1;c237945.graph_c0;c242604.graph_c0;c242744.graph_c0;c203951.graph_c0;c242269.graph_c1;c194374.graph_c1;c235758.graph_c1;c239477.graph_c0;c233336.…
	biological process	single-organism process	GO:0044699	12284	35	c225900.graph_c0;c229674.graph_c0;c242604.graph_c0;c242269.graph_c1;c194374.graph_c1;c233178.graph_c0;c243247.graph_c0;c231310.graph_c0;c237945.graph_c0;c239878.graph_c1;c224218.graph_c0;c236633.graph_c0;c242074.graph_c0;c230178.graph_c1;c241433.graph_c0;c240366.graph_c0;c242260.graph_c0;c235022.graph_c0;c234390.graph_c0;c237148.graph_c0;c242744.graph_c0;c203951.graph_c0;c212588.graph_c1;c242185.…
	biological process	localization	GO:0051179	4116	10	c230178.graph_c1;c242033.graph_c0;c231310.graph_c0;c233178.graph_c0;c234390.graph_c0;c242484.graph_c0;c203951.graph_c0;c239838.graph_c1;c242269.graph_c1;c236633.graph_c0
	biological process	response to stimulus	GO:0050896	3917	18	c234390.graph_c0;c242260.graph_c0;c239805.graph_c0;c225900.graph_c0;c230178.graph_c1;c233336.graph_c2;c212588.graph_c1;c213294.graph_c1;c203951.graph_c0;c237148.graph_c0;c232513.graph_c1;c237368.graph_c2;c231310.graph_c0;c233178.graph_c0;c205025.graph_c0;c173588.graph_c0;c237874.graph_c0;c242484.graph_c0
	biological process	biological regulation	GO:0065007	3911	6	c173588.graph_c0;c231310.graph_c0;c235392.graph_c0;c234390.graph_c0;c237368.graph_c2;c232513.graph_c1
	biological process	cellular component organization or biogenesis	GO:0071840	2916	3	c232513.graph_c1;c224218.graph_c0;c231310.graph_c0
	biological process	developmental process	GO:0032502	1668	7	c231310.graph_c0;c243247.graph_c0;c239878.graph_c1;c233336.graph_c2;c224218.graph_c0;c234390.graph_c0;c237368.graph_c2
	biological process	multicellular organismal process	GO:0032501	1384	5	c224218.graph_c0;c234390.graph_c0;c243247.graph_c0;c231310.graph_c0;c239878.graph_c1
	biological process	signaling	GO:0023052	1158	1	c231310.graph_c0
	biological process	reproductive process	GO:0022414	807	4	c231310.graph_c0;c243247.graph_c0;c234390.graph_c0;c224218.graph_c0
	biological process	multi-organism process	GO:0051704	727	5	c243247.graph_c0;c231310.graph_c0;c234390.graph_c0;c232513.graph_c1;c224218.graph_c0
	biological process	growth	GO:0040007	403	4	c173588.graph_c0;c239878.graph_c1;c224218.graph_c0;c233336.graph_c2
	biological process	reproduction	GO:0000003	395	1	c243247.graph_c0
	biological process	immune system process	GO:0002376	224	1	c231310.graph_c0
	biological process	biological adhesion	GO:0022610	39	0
	biological process	biological phase	GO:0044848	34	0
	biological process	rhythmic process	GO:0048511	30	0
	biological process	locomotion	GO:0040011	14	0
	biological process	cell killing	GO:0001906	10	0
	cellular component	cell	GO:0005623	12065	25	c239377.graph_c0;c233336.graph_c2;c237148.graph_c0;c212588.graph_c1;c237858.graph_c0;c242269.graph_c1;c213294.graph_c1;c234390.graph_c0;c235392.graph_c0;c242260.graph_c0;c216560.graph_c0;c217964.graph_c0;c230178.graph_c1;c229674.graph_c0;c224218.graph_c0;c242484.graph_c0;c239340.graph_c2;c239878.graph_c1;c232776.graph_c0;c237368.graph_c2;c232513.graph_c1;c205025.graph_c0;c231310.graph_c0;c233178.…
	cellular component	cell part	GO:0044464	12065	25	c232513.graph_c1;c237368.graph_c2;c238653.graph_c0;c233178.graph_c0;c231310.graph_c0;c205025.graph_c0;c224218.graph_c0;c232776.graph_c0;c239340.graph_c2;c239878.graph_c1;c242484.graph_c0;c216560.graph_c0;c217964.graph_c0;c242260.graph_c0;c235392.graph_c0;c234390.graph_c0;c229674.graph_c0;c230178.graph_c1;c233336.graph_c2;c239377.graph_c0;c242269.graph_c1;c213294.graph_c1;c212588.graph_c1;c237858.…
	cellular component	organelle	GO:0043226	9174	19	c205025.graph_c0;c231310.graph_c0;c233178.graph_c0;c238653.graph_c0;c237368.graph_c2;c242484.graph_c0;c239878.graph_c1;c239340.graph_c2;c224218.graph_c0;c230178.graph_c1;c229674.graph_c0;c234390.graph_c0;c242260.graph_c0;c235392.graph_c0;c216560.graph_c0;c217964.graph_c0;c213294.graph_c1;c239377.graph_c0;c233336.graph_c2
	cellular component	membrane	GO:0016020	5981	11	c239878.graph_c1;c239340.graph_c2;c236160.graph_c0;c242484.graph_c0;c242269.graph_c1;c236633.graph_c0;c239377.graph_c0;c230178.graph_c1;c242033.graph_c0;c242260.graph_c0;c232513.graph_c1
	cellular component	macromolecular complex	GO:0032991	4313	0
	cellular component	organelle part	GO:0044422	3894	7	c233336.graph_c2;c237368.graph_c2;c234390.graph_c0;c233178.graph_c0;c242484.graph_c0;c239340.graph_c2;c239878.graph_c1
	cellular component	membrane part	GO:0044425	3333	3	c230178.graph_c1;c242269.graph_c1;c236633.graph_c0
	cellular component	membrane-enclosed lumen	GO:0031974	903	1	c233178.graph_c0
	cellular component	extracellular region	GO:0005576	734	4	c235038.graph_c0;c242484.graph_c0;c232513.graph_c1;c234390.graph_c0
	cellular component	cell junction	GO:0030054	315	1	c234390.graph_c0
	cellular component	symplast	GO:0055044	314	1	c234390.graph_c0
	cellular component	nucleoid	GO:0009295	57	0
	cellular component	extracellular region part	GO:0044421	13	0
	cellular component	virion	GO:0019012	10	0
	cellular component	virion part	GO:0044423	10	0
	molecular function	catalytic activity	GO:0003824	15424	59	c217964.graph_c0;c234390.graph_c0;c235022.graph_c0;c242146.graph_c0;c235440.graph_c0;c242260.graph_c0;c234484.graph_c0;c240366.graph_c0;c241433.graph_c0;c239377.graph_c0;c242185.graph_c0;c233336.graph_c2;c239477.graph_c0;c212588.graph_c1;c213294.graph_c1;c242744.graph_c0;c203951.graph_c0;c237148.graph_c0;c241752.graph_c0;c231427.graph_c2;c217982.graph_c0;c242686.graph_c0;c234917.graph_c0;c241754.…
	molecular function	binding	GO:0005488	13436	37	c237874.graph_c0;c235980.graph_c1;c237931.graph_c0;c244808.graph_c0;c234756.graph_c0;c242606.graph_c1;c242484.graph_c0;c217982.graph_c0;c218471.graph_c0;c242686.graph_c0;c236755.graph_c0;c241754.graph_c1;c194374.graph_c0;c233336.graph_c2;c239377.graph_c0;c239477.graph_c0;c237606.graph_c1;c217964.graph_c0;c242146.graph_c0;c242260.graph_c0;c235022.graph_c0;c234390.graph_c0;c240366.graph_c0;c224218.…
	molecular function	transporter activity	GO:0005215	1862	3	c242269.graph_c1;c242033.graph_c0;c236633.graph_c0
	molecular function	structural molecule activity	GO:0005198	1553	0
	molecular function	nucleic acid binding transcription factor activity	GO:0001071	730	1	c235392.graph_c0
	molecular function	electron carrier activity	GO:0009055	475	1	c237931.graph_c0
	molecular function	antioxidant activity	GO:0016209	282	3	c237874.graph_c0;c242260.graph_c0;c225900.graph_c0
	molecular function	molecular transducer activity	GO:0060089	243	0
	molecular function	signal transducer activity	GO:0004871	243	0
	molecular function	transcription factor activity, protein binding	GO:0000988	60	0
	molecular function	metallochaperone activity	GO:0016530	18	0
	molecular function	nutrient reservoir activity	GO:0045735	17	0
	molecular function	protein tag	GO:0031386	6	0
	molecular function	translation regulator activity	GO:0045182	2	0

## Sheet: Table S6
	Table S6. KEGG pathway analysis of the assembled unigenes in developing clone C5 roots.
Treatment time	#Kegg_pathway	ko_id	Cluster_frequency	Genome_frequency	P-value	Corrected_P-value	rich_factor
6h	Plant hormone signal transduction	ko04075	54 out of 664 8.13253012048193%	215.0 out of 11356 1.89327227897147%	1.00464e-12	1.18548e-10	4.29549
	Phenylpropanoid biosynthesis	ko00940	52 out of 664 7.83132530120482%	285.0 out of 11356 2.50968650933427%	4.49152e-12	5.29999e-10	3.12044
	Linoleic acid metabolism	ko00591	15 out of 664 2.25903614457831%	35.0 out of 11356 0.308207115181402%	2.96573e-10	3.49956e-08	7.3296
	Phenylalanine metabolism	ko00360	40 out of 664 6.02409638554217%	228.0 out of 11356 2.00774920746742%	3.02265e-10	3.56673e-08	3.00042
	Photosynthesis	ko00195	25 out of 664 3.76506024096386%	129.0 out of 11356 1.13596336738288%	9.19518e-08	1.08503e-05	3.31442
	Plant-pathogen interaction	ko04626	27 out of 664 4.06626506024096%	181.0 out of 11356 1.59387108136668%	6.24724e-06	0.000737174	2.55119
	Starch and sucrose metabolism	ko00500	40 out of 664 6.02409638554217%	332.0 out of 11356 2.92356463543501%	1.00748e-05	0.00118883	2.06053
	Zeatin biosynthesis	ko00908	7 out of 664 1.05421686746988%	19.0 out of 11356 0.167312433955618%	6.1413e-05	0.00724673	6.30089
	Terpenoid backbone biosynthesis	ko00900	17 out of 664 2.56024096385542%	103.0 out of 11356 0.907009510390983%	9.04392e-05	0.0106718	2.82273
	Pentose and glucuronate interconversions	ko00040	24 out of 664 3.6144578313253%	183.0 out of 11356 1.6114829165199%	0.000164926	0.0194612	2.24294
	Diterpenoid biosynthesis	ko00904	9 out of 664 1.35542168674699%	37.0 out of 11356 0.325818950334625%	0.000214263	0.025283	4.16005
	Cutin, suberine and wax biosynthesis	ko00073	8 out of 664 1.20481927710843%	34.0 out of 11356 0.29940119760479%	0.00061174	0.0721853	4.0241
	Monoterpenoid biosynthesis	ko00902	4 out of 664 0.602409638554217%	8.0 out of 11356 0.0704473406128919%	0.000670934	0.0791702	8.5512
	alpha-Linolenic acid metabolism	ko00592	14 out of 664 2.10843373493976%	106.0 out of 11356 0.933427263120817%	0.00340501	0.401791	2.25881
	Carotenoid biosynthesis	ko00906	8 out of 664 1.20481927710843%	44.0 out of 11356 0.387460373370905%	0.00356444	0.420604	3.10953
	Thiamine metabolism	ko00730	6 out of 664 0.903614457831325%	28.0 out of 11356 0.246565692145122%	0.00486589	0.574176	3.6648
	Circadian rhythm - plant	ko04712	9 out of 664 1.35542168674699%	57.0 out of 11356 0.501937301866854%	0.00545776	0.644015	2.70038
	Glucosinolate biosynthesis	ko00966	1 out of 664 0.150602409638554%	4.0 out of 11356 0.0352236703064459%	0.214186	1	4.2756
	Stilbenoid, diarylheptanoid and gingerol biosynthesis	ko00945	5 out of 664 0.753012048192771%	24.0 out of 11356 0.211342021838676%	0.011306	1	3.563
	Vitamin B6 metabolism	ko00750	5 out of 664 0.753012048192771%	27.0 out of 11356 0.23775977456851%	0.0185921	1	3.16711
	Betalain biosynthesis	ko00965	2 out of 664 0.301204819277108%	12.0 out of 11356 0.105671010919338%	0.152988	1	2.8504
	Glycosphingolipid biosynthesis - globo series	ko00603	6 out of 664 0.903614457831325%	42.0 out of 11356 0.369848538217682%	0.0340179	1	2.4432
	Glycosaminoglycan degradation	ko00531	4 out of 664 0.602409638554217%	29.0 out of 11356 0.255371609721733%	0.0863308	1	2.35895
	ABC transporters	ko02010	10 out of 664 1.50602409638554%	76.0 out of 11356 0.669249735822473%	0.0126737	1	2.25032
	Flavonoid biosynthesis	ko00941	7 out of 664 1.05421686746988%	57.0 out of 11356 0.501937301866854%	0.0473125	1	2.1003
	Fatty acid elongation	ko00062	5 out of 664 0.753012048192771%	41.0 out of 11356 0.361042620641071%	0.0890477	1	2.08566
	Brassinosteroid biosynthesis	ko00905	2 out of 664 0.301204819277108%	17.0 out of 11356 0.149700598802395%	0.261841	1	2.01205
	Biotin metabolism	ko00780	5 out of 664 0.753012048192771%	43.0 out of 11356 0.378654455794294%	0.104225	1	1.98865
	beta-Alanine metabolism	ko00410	16 out of 664 2.40963855421687%	142.0 out of 11356 1.25044029587883%	0.00872779	1	1.92703
	Flavone and flavonol biosynthesis	ko00944	1 out of 664 0.150602409638554%	9.0 out of 11356 0.0792532581895034%	0.418678	1	1.90027
	Glycerolipid metabolism	ko00561	16 out of 664 2.40963855421687%	154.0 out of 11356 1.35611130679817%	0.0180344	1	1.77687
	Cyanoamino acid metabolism	ko00460	11 out of 664 1.6566265060241%	108.0 out of 11356 0.95103909827404%	0.0506562	1	1.74191
	Glycine, serine and threonine metabolism	ko00260	20 out of 664 3.01204819277108%	202.0 out of 11356 1.77879535047552%	0.0146043	1	1.69331
	Fatty acid biosynthesis	ko00061	10 out of 664 1.50602409638554%	107.0 out of 11356 0.942233180697429%	0.0952562	1	1.59836
	Isoquinoline alkaloid biosynthesis	ko00950	4 out of 664 0.602409638554217%	43.0 out of 11356 0.378654455794294%	0.24199	1	1.59092
	Fructose and mannose metabolism	ko00051	13 out of 664 1.9578313253012%	140.0 out of 11356 1.23282846072561%	0.0659429	1	1.58808
	Galactose metabolism	ko00052	13 out of 664 1.9578313253012%	141.0 out of 11356 1.24163437830222%	0.0689614	1	1.57682
	Other types of O-glycan biosynthesis	ko00514	2 out of 664 0.301204819277108%	22.0 out of 11356 0.193730186685453%	0.371444	1	1.55476
	Folate biosynthesis	ko00790	3 out of 664 0.451807228915663%	34.0 out of 11356 0.29940119760479%	0.319871	1	1.50904
	Phenylalanine, tyrosine and tryptophan biosynthesis	ko00400	8 out of 664 1.20481927710843%	93.0 out of 11356 0.818950334624868%	0.176278	1	1.47118
	Ether lipid metabolism	ko00565	5 out of 664 0.753012048192771%	60.0 out of 11356 0.528355054596689%	0.272929	1	1.4252
	Biosynthesis of unsaturated fatty acids	ko01040	9 out of 664 1.35542168674699%	110.0 out of 11356 0.968650933427263%	0.193831	1	1.39929
	Porphyrin and chlorophyll metabolism	ko00860	8 out of 664 1.20481927710843%	98.0 out of 11356 0.862979922507925%	0.213911	1	1.39612
	Amino sugar and nucleotide sugar metabolism	ko00520	22 out of 664 3.31325301204819%	277.0 out of 11356 2.43923916872138%	0.0886843	1	1.35831
	Degradation of aromatic compounds	ko01220	3 out of 664 0.451807228915663%	39.0 out of 11356 0.343430785487848%	0.401063	1	1.31557
	Nitrogen metabolism	ko00910	7 out of 664 1.05421686746988%	92.0 out of 11356 0.810144417048256%	0.291685	1	1.30127
	Arginine and proline metabolism	ko00330	18 out of 664 2.71084337349398%	239.0 out of 11356 2.10461430081014%	0.162131	1	1.28805
	Taurine and hypotaurine metabolism	ko00430	2 out of 664 0.301204819277108%	27.0 out of 11356 0.23775977456851%	0.47405	1	1.26685
	Tyrosine metabolism	ko00350	9 out of 664 1.35542168674699%	122.0 out of 11356 1.0743219443466%	0.284233	1	1.26165
	Pentose phosphate pathway	ko00030	12 out of 664 1.80722891566265%	163.0 out of 11356 1.43536456498767%	0.245255	1	1.25907
	Other glycan degradation	ko00511	4 out of 664 0.602409638554217%	55.0 out of 11356 0.484325466713632%	0.402515	1	1.24381
	Glycolysis / Gluconeogenesis	ko00010	27 out of 664 4.06626506024096%	374.0 out of 11356 3.29341317365269%	0.149815	1	1.23467
	Limonene and pinene degradation	ko00903	2 out of 664 0.301204819277108%	28.0 out of 11356 0.246565692145122%	0.493348	1	1.2216
	Glutathione metabolism	ko00480	18 out of 664 2.71084337349398%	252.0 out of 11356 2.21909122930609%	0.221256	1	1.2216
	Glycosphingolipid biosynthesis - ganglio series	ko00604	1 out of 664 0.150602409638554%	14.0 out of 11356 0.123282846072561%	0.570015	1	1.2216
	Glycerophospholipid metabolism	ko00564	13 out of 664 1.9578313253012%	183.0 out of 11356 1.6114829165199%	0.273549	1	1.21493
	Tropane, piperidine and pyridine alkaloid biosynthesis	ko00960	3 out of 664 0.451807228915663%	44.0 out of 11356 0.387460373370905%	0.479317	1	1.16607
	Fatty acid metabolism	ko01212	15 out of 664 2.25903614457831%	225.0 out of 11356 1.98133145473758%	0.337228	1	1.14016
	Photosynthesis - antenna proteins	ko00196	3 out of 664 0.451807228915663%	46.0 out of 11356 0.405072208524128%	0.509274	1	1.11537
	Arachidonic acid metabolism	ko00590	3 out of 664 0.451807228915663%	47.0 out of 11356 0.41387812610074%	0.52391	1	1.09164
	Cysteine and methionine metabolism	ko00270	17 out of 664 2.56024096385542%	278.0 out of 11356 2.44804508629799%	0.460311	1	1.04583
	Riboflavin metabolism	ko00740	2 out of 664 0.301204819277108%	33.0 out of 11356 0.290595280028179%	0.582806	1	1.03651
	Pyruvate metabolism	ko00620	16 out of 664 2.40963855421687%	266.0 out of 11356 2.34237407537865%	0.490705	1	1.02872
	Alanine, aspartate and glutamate metabolism	ko00250	12 out of 664 1.80722891566265%	207.0 out of 11356 1.82282493835858%	0.555105	1	0.991444
	Ubiquinone and other terpenoid-quinone biosynthesis	ko00130	4 out of 664 0.602409638554217%	70.0 out of 11356 0.616414230362804%	0.591408	1	0.977281
	Carbon fixation in photosynthetic organisms	ko00710	14 out of 664 2.10843373493976%	246.0 out of 11356 2.16625572384642%	0.581471	1	0.973308
	C5-Branched dibasic acid metabolism	ko00660	1 out of 664 0.150602409638554%	18.0 out of 11356 0.158506516379007%	0.662215	1	0.950134
	Valine, leucine and isoleucine biosynthesis	ko00290	4 out of 664 0.602409638554217%	73.0 out of 11356 0.642831983092638%	0.624818	1	0.937118
	Sulfur metabolism	ko00920	5 out of 664 0.753012048192771%	92.0 out of 11356 0.810144417048256%	0.630971	1	0.929479
	Endocytosis	ko04144	20 out of 664 3.01204819277108%	371.0 out of 11356 3.26699542092286%	0.68061	1	0.921963
	Phosphatidylinositol signaling system	ko04070	7 out of 664 1.05421686746988%	134.0 out of 11356 1.17999295526594%	0.674504	1	0.893409
	Sphingolipid metabolism	ko00600	5 out of 664 0.753012048192771%	103.0 out of 11356 0.907009510390983%	0.727254	1	0.830214
	mRNA surveillance pathway	ko03015	11 out of 664 1.6566265060241%	230.0 out of 11356 2.02536104262064%	0.795506	1	0.817941
	Carbon metabolism	ko01200	41 out of 664 6.17469879518072%	863.0 out of 11356 7.59950686861571%	0.937021	1	0.812513
	Steroid biosynthesis	ko00100	5 out of 664 0.753012048192771%	106.0 out of 11356 0.933427263120817%	0.750109	1	0.806717
	Biosynthesis of amino acids	ko01230	34 out of 664 5.12048192771084%	727.0 out of 11356 6.40190207819655%	0.933182	1	0.799838
	Propanoate metabolism	ko00640	6 out of 664 0.903614457831325%	129.0 out of 11356 1.13596336738288%	0.773002	1	0.795461
	Synthesis and degradation of ketone bodies	ko00072	1 out of 664 0.150602409638554%	23.0 out of 11356 0.202536104262064%	0.750213	1	0.743583
	RNA degradation	ko03018	11 out of 664 1.6566265060241%	263.0 out of 11356 2.31595632264882%	0.908188	1	0.71531
	Inositol phosphate metabolism	ko00562	6 out of 664 0.903614457831325%	148.0 out of 11356 1.3032758013385%	0.870933	1	0.693341
	Nucleotide excision repair	ko03420	5 out of 664 0.753012048192771%	128.0 out of 11356 1.12715744980627%	0.875812	1	0.668063
	Selenocompound metabolism	ko00450	3 out of 664 0.451807228915663%	77.0 out of 11356 0.678055653399084%	0.835994	1	0.666328
	Homologous recombination	ko03440	3 out of 664 0.451807228915663%	79.0 out of 11356 0.695667488552307%	0.848537	1	0.649459
	Nicotinate and nicotinamide metabolism	ko00760	2 out of 664 0.301204819277108%	53.0 out of 11356 0.466713631560409%	0.824562	1	0.645374
	Base excision repair	ko03410	3 out of 664 0.451807228915663%	80.0 out of 11356 0.704473406128919%	0.85449	1	0.64134
	One carbon pool by folate	ko00670	2 out of 664 0.301204819277108%	54.0 out of 11356 0.47551954913702%	0.832464	1	0.633423
	Protein processing in endoplasmic reticulum	ko04141	23 out of 664 3.46385542168675%	654.0 out of 11356 5.75907009510391%	0.998002	1	0.601461
	Basal transcription factors	ko03022	3 out of 664 0.451807228915663%	86.0 out of 11356 0.757308911588587%	0.886082	1	0.596596
	Oxidative phosphorylation	ko00190	18 out of 664 2.71084337349398%	572.0 out of 11356 5.03698485382177%	0.999191	1	0.538188
	Ascorbate and aldarate metabolism	ko00053	3 out of 664 0.451807228915663%	99.0 out of 11356 0.871785840084537%	0.934423	1	0.518255
	N-Glycan biosynthesis	ko00510	3 out of 664 0.451807228915663%	106.0 out of 11356 0.933427263120817%	0.951813	1	0.48403
	Histidine metabolism	ko00340	2 out of 664 0.301204819277108%	72.0 out of 11356 0.634026065516027%	0.929143	1	0.475067
	Purine metabolism	ko00230	11 out of 664 1.6566265060241%	401.0 out of 11356 3.5311729482212%	0.998986	1	0.469143
	Glyoxylate and dicarboxylate metabolism	ko00630	7 out of 664 1.05421686746988%	260.0 out of 11356 2.28953856991899%	0.994785	1	0.460449
	Butanoate metabolism	ko00650	2 out of 664 0.301204819277108%	75.0 out of 11356 0.660443818245861%	0.938903	1	0.456064
	Lysine biosynthesis	ko00300	1 out of 664 0.150602409638554%	39.0 out of 11356 0.343430785487848%	0.904995	1	0.438523
	Mismatch repair	ko03430	2 out of 664 0.301204819277108%	82.0 out of 11356 0.722085241282142%	0.95695	1	0.417132
	Spliceosome	ko03040	12 out of 664 1.80722891566265%	499.0 out of 11356 4.39415287072913%	0.999943	1	0.41128
	DNA replication	ko03030	3 out of 664 0.451807228915663%	128.0 out of 11356 1.12715744980627%	0.982418	1	0.400838
	Fatty acid degradation	ko00071	4 out of 664 0.602409638554217%	171.0 out of 11356 1.50581190560056%	0.991508	1	0.400056
	Glycosylphosphatidylinositol(GPI)-anchor biosynthesis	ko00563	1 out of 664 0.150602409638554%	46.0 out of 11356 0.405072208524128%	0.937787	1	0.371792
	Peroxisome	ko04146	6 out of 664 0.903614457831325%	277.0 out of 11356 2.43923916872138%	0.999152	1	0.370449
	Valine, leucine and isoleucine degradation	ko00280	4 out of 664 0.602409638554217%	204.0 out of 11356 1.79640718562874%	0.998162	1	0.335341
	Citrate cycle (TCA cycle)	ko00020	6 out of 664 0.903614457831325%	307.0 out of 11356 2.70341669601973%	0.999782	1	0.334249
	Pyrimidine metabolism	ko00240	6 out of 664 0.903614457831325%	311.0 out of 11356 2.73864036632617%	0.999819	1	0.32995
	2-Oxocarboxylic acid metabolism	ko01210	4 out of 664 0.602409638554217%	208.0 out of 11356 1.83163085593519%	0.998482	1	0.328892
	Protein export	ko03060	2 out of 664 0.301204819277108%	109.0 out of 11356 0.959845015850652%	0.989334	1	0.313806
	Ubiquitin mediated proteolysis	ko04120	5 out of 664 0.753012048192771%	284.0 out of 11356 2.50088059175766%	0.999837	1	0.301099
	Phagosome	ko04145	6 out of 664 0.903614457831325%	349.0 out of 11356 3.07326523423741%	0.99997	1	0.294024
	Lysine degradation	ko00310	2 out of 664 0.301204819277108%	118.0 out of 11356 1.03909827404016%	0.993384	1	0.289871
	Tryptophan metabolism	ko00380	2 out of 664 0.301204819277108%	124.0 out of 11356 1.09193377949982%	0.995201	1	0.275845
	RNA transport	ko03013	7 out of 664 1.05421686746988%	435.0 out of 11356 3.830574145826%	0.999998	1	0.275211
	SNARE interactions in vesicular transport	ko04130	1 out of 664 0.150602409638554%	68.0 out of 11356 0.598802395209581%	0.983585	1	0.251506
	Pantothenate and CoA biosynthesis	ko00770	1 out of 664 0.150602409638554%	74.0 out of 11356 0.65163790066925%	0.988591	1	0.231114
	Aminoacyl-tRNA biosynthesis	ko00970	2 out of 664 0.301204819277108%	192.0 out of 11356 1.6907361747094%	0.999888	1	0.17815
	RNA polymerase	ko03020	1 out of 664 0.150602409638554%	102.0 out of 11356 0.898203592814371%	0.997917	1	0.167671
	Ribosome biogenesis in eukaryotes	ko03008	2 out of 664 0.301204819277108%	259.0 out of 11356 2.28073265234237%	0.999998	1	0.132065
	Ribosome	ko03010	10 out of 664 1.50602409638554%	1644.0 out of 11356 14.4769284959493%	1	1	0.104029
12h	Plant hormone signal transduction	ko04075	77 out of 1279 6.02032838154808%	215.0 out of 11356 1.89327227897147%	1.3346e-12	1.64156e-10	3.17985
	Phenylpropanoid biosynthesis	ko00940	83 out of 1279 6.48944487881157%	285.0 out of 11356 2.50968650933427%	3.22276e-12	3.96399e-10	2.58576
	Linoleic acid metabolism	ko00591	18 out of 1279 1.40734949179046%	35.0 out of 11356 0.308207115181402%	5.24693e-09	6.45372e-07	4.56625
	Phenylalanine metabolism	ko00360	56 out of 1279 4.37842064112588%	228.0 out of 11356 2.00774920746742%	9.56596e-09	1.17661e-06	2.18076
	Starch and sucrose metabolism	ko00500	66 out of 1279 5.16028146989836%	332.0 out of 11356 2.92356463543501%	2.43996e-06	0.000300115	1.76506
	Plant-pathogen interaction	ko04626	40 out of 1279 3.12744331508991%	181.0 out of 11356 1.59387108136668%	1.93648e-05	0.00238187	1.96217
	Diterpenoid biosynthesis	ko00904	13 out of 1279 1.01641907740422%	37.0 out of 11356 0.325818950334625%	0.000116716	0.0143561	3.11958
	Flavonoid biosynthesis	ko00941	16 out of 1279 1.25097732603597%	57.0 out of 11356 0.501937301866854%	0.000395823	0.0486863	2.4923
	Zeatin biosynthesis	ko00908	8 out of 1279 0.625488663017983%	19.0 out of 11356 0.167312433955618%	0.000610638	0.0751085	3.73845
	Glycosaminoglycan degradation	ko00531	10 out of 1279 0.781860828772479%	29.0 out of 11356 0.255371609721733%	0.000846777	0.104154	3.06166
	Glycerophospholipid metabolism	ko00564	35 out of 1279 2.73651290070367%	183.0 out of 11356 1.6114829165199%	0.00113255	0.139303	1.69813
	alpha-Linolenic acid metabolism	ko00592	23 out of 1279 1.7982799061767%	106.0 out of 11356 0.933427263120817%	0.0014049	0.172803	1.92653
	Cutin, suberine and wax biosynthesis	ko00073	10 out of 1279 0.781860828772479%	34.0 out of 11356 0.29940119760479%	0.00328301	0.40381	2.61142
	Circadian rhythm - plant	ko04712	14 out of 1279 1.09460516028147%	57.0 out of 11356 0.501937301866854%	0.00357933	0.440258	2.18076
	Glycerolipid metabolism	ko00561	29 out of 1279 2.26739640344019%	154.0 out of 11356 1.35611130679817%	0.00365041	0.449001	1.67198
	Cyanoamino acid metabolism	ko00460	22 out of 1279 1.72009382329945%	108.0 out of 11356 0.95103909827404%	0.00403886	0.496779	1.80865
	Terpenoid backbone biosynthesis	ko00900	21 out of 1279 1.6419077404222%	103.0 out of 11356 0.907009510390983%	0.00484794	0.596297	1.81024
	Ether lipid metabolism	ko00565	14 out of 1279 1.09460516028147%	60.0 out of 11356 0.528355054596689%	0.00585777	0.720506	2.07172
	Monoterpenoid biosynthesis	ko00902	4 out of 1279 0.312744331508991%	8.0 out of 11356 0.0704473406128919%	0.00771562	0.949021	4.43941
	Carotenoid biosynthesis	ko00906	11 out of 1279 0.860046911649726%	44.0 out of 11356 0.387460373370905%	0.00812126	0.998915	2.2197
	Vancomycin resistance	ko01502	2 out of 1279 0.156372165754496%	3.0 out of 11356 0.0264177527298344%	0.0351772	1	5.91921
	Flavone and flavonol biosynthesis	ko00944	3 out of 1279 0.234558248631744%	9.0 out of 11356 0.0792532581895034%	0.0712157	1	2.9596
	Brassinosteroid biosynthesis	ko00905	5 out of 1279 0.390930414386239%	17.0 out of 11356 0.149700598802395%	0.0350025	1	2.61142
	Thiamine metabolism	ko00730	8 out of 1279 0.625488663017983%	28.0 out of 11356 0.246565692145122%	0.00999213	1	2.5368
	Stilbenoid, diarylheptanoid and gingerol biosynthesis	ko00945	6 out of 1279 0.469116497263487%	24.0 out of 11356 0.211342021838676%	0.045823	1	2.2197
	Betalain biosynthesis	ko00965	3 out of 1279 0.234558248631744%	12.0 out of 11356 0.105671010919338%	0.145003	1	2.2197
	Glucosinolate biosynthesis	ko00966	1 out of 1279 0.0781860828772478%	4.0 out of 11356 0.0352236703064459%	0.379996	1	2.2197
	Lipoic acid metabolism	ko00785	2 out of 1279 0.156372165754496%	9.0 out of 11356 0.0792532581895034%	0.269125	1	1.97307
	Glycosphingolipid biosynthesis - ganglio series	ko00604	3 out of 1279 0.234558248631744%	14.0 out of 11356 0.123282846072561%	0.203492	1	1.9026
	Homologous recombination	ko03440	15 out of 1279 1.17279124315872%	79.0 out of 11356 0.695667488552307%	0.0289127	1	1.68585
	Base excision repair	ko03410	15 out of 1279 1.17279124315872%	80.0 out of 11356 0.704473406128919%	0.032017	1	1.66478
	Biotin metabolism	ko00780	8 out of 1279 0.625488663017983%	43.0 out of 11356 0.378654455794294%	0.104272	1	1.65187
	Vitamin B6 metabolism	ko00750	5 out of 1279 0.390930414386239%	27.0 out of 11356 0.23775977456851%	0.181182	1	1.64422
	Limonene and pinene degradation	ko00903	5 out of 1279 0.390930414386239%	28.0 out of 11356 0.246565692145122%	0.201557	1	1.5855
	Folate biosynthesis	ko00790	6 out of 1279 0.469116497263487%	34.0 out of 11356 0.29940119760479%	0.177617	1	1.56685
	Phenylalanine, tyrosine and tryptophan biosynthesis	ko00400	16 out of 1279 1.25097732603597%	93.0 out of 11356 0.818950334624868%	0.0550057	1	1.52754
	Fatty acid elongation	ko00062	7 out of 1279 0.547302580140735%	41.0 out of 11356 0.361042620641071%	0.172548	1	1.51589
	Arachidonic acid metabolism	ko00590	8 out of 1279 0.625488663017983%	47.0 out of 11356 0.41387812610074%	0.153118	1	1.51129
	Amino sugar and nucleotide sugar metabolism	ko00520	43 out of 1279 3.36200156372166%	277.0 out of 11356 2.43923916872138%	0.0178719	1	1.3783
	beta-Alanine metabolism	ko00410	22 out of 1279 1.72009382329945%	142.0 out of 11356 1.25044029587883%	0.07507	1	1.37559
	Glycosylphosphatidylinositol(GPI)-anchor biosynthesis	ko00563	7 out of 1279 0.547302580140735%	46.0 out of 11356 0.405072208524128%	0.256609	1	1.35112
	Riboflavin metabolism	ko00740	5 out of 1279 0.390930414386239%	33.0 out of 11356 0.290595280028179%	0.312271	1	1.34527
	Fatty acid biosynthesis	ko00061	16 out of 1279 1.25097732603597%	107.0 out of 11356 0.942233180697429%	0.1451	1	1.32767
	Galactose metabolism	ko00052	21 out of 1279 1.6419077404222%	141.0 out of 11356 1.24163437830222%	0.110435	1	1.32238
	Pantothenate and CoA biosynthesis	ko00770	11 out of 1279 0.860046911649726%	74.0 out of 11356 0.65163790066925%	0.206967	1	1.31982
	Other glycan degradation	ko00511	8 out of 1279 0.625488663017983%	55.0 out of 11356 0.484325466713632%	0.275672	1	1.29146
	Biosynthesis of unsaturated fatty acids	ko01040	16 out of 1279 1.25097732603597%	110.0 out of 11356 0.968650933427263%	0.171374	1	1.29146
	ABC transporters	ko02010	11 out of 1279 0.860046911649726%	76.0 out of 11356 0.669249735822473%	0.232674	1	1.28509
	Glycosphingolipid biosynthesis - globo series	ko00603	6 out of 1279 0.469116497263487%	42.0 out of 11356 0.369848538217682%	0.333603	1	1.2684
	Nucleotide excision repair	ko03420	18 out of 1279 1.40734949179046%	128.0 out of 11356 1.12715744980627%	0.190299	1	1.24858
	DNA replication	ko03030	18 out of 1279 1.40734949179046%	128.0 out of 11356 1.12715744980627%	0.190299	1	1.24858
	Basal transcription factors	ko03022	12 out of 1279 0.938232994526974%	86.0 out of 11356 0.757308911588587%	0.258529	1	1.2389
	Arginine and proline metabolism	ko00330	33 out of 1279 2.58014073494918%	239.0 out of 11356 2.10461430081014%	0.125564	1	1.22594
	Pentose and glucuronate interconversions	ko00040	25 out of 1279 1.9546520719312%	183.0 out of 11356 1.6114829165199%	0.178171	1	1.21295
	Mismatch repair	ko03430	11 out of 1279 0.860046911649726%	82.0 out of 11356 0.722085241282142%	0.316003	1	1.19106
	Steroid biosynthesis	ko00100	14 out of 1279 1.09460516028147%	106.0 out of 11356 0.933427263120817%	0.304399	1	1.17267
	Photosynthesis	ko00195	17 out of 1279 1.32916340891321%	129.0 out of 11356 1.13596336738288%	0.282136	1	1.17008
	Ascorbate and aldarate metabolism	ko00053	13 out of 1279 1.01641907740422%	99.0 out of 11356 0.871785840084537%	0.321414	1	1.1659
	Fructose and mannose metabolism	ko00051	18 out of 1279 1.40734949179046%	140.0 out of 11356 1.23282846072561%	0.31127	1	1.14156
	Glutathione metabolism	ko00480	32 out of 1279 2.50195465207193%	252.0 out of 11356 2.21909122930609%	0.260021	1	1.12747
	Fatty acid metabolism	ko01212	28 out of 1279 2.18921032056294%	225.0 out of 11356 1.98133145473758%	0.315443	1	1.10492
	Valine, leucine and isoleucine biosynthesis	ko00290	9 out of 1279 0.703674745895231%	73.0 out of 11356 0.642831983092638%	0.440175	1	1.09465
	Endocytosis	ko04144	45 out of 1279 3.51837372947615%	371.0 out of 11356 3.26699542092286%	0.319446	1	1.07694
	Ribosome biogenesis in eukaryotes	ko03008	31 out of 1279 2.42376856919468%	259.0 out of 11356 2.28073265234237%	0.387051	1	1.06271
	Tyrosine metabolism	ko00350	14 out of 1279 1.09460516028147%	122.0 out of 11356 1.0743219443466%	0.512992	1	1.01888
	RNA degradation	ko03018	30 out of 1279 2.34558248631744%	263.0 out of 11356 2.31595632264882%	0.499791	1	1.01279
	Glycine, serine and threonine metabolism	ko00260	23 out of 1279 1.7982799061767%	202.0 out of 11356 1.77879535047552%	0.511253	1	1.01095
	C5-Branched dibasic acid metabolism	ko00660	2 out of 1279 0.156372165754496%	18.0 out of 11356 0.158506516379007%	0.617918	1	0.986535
	Non-homologous end-joining	ko03450	2 out of 1279 0.156372165754496%	18.0 out of 11356 0.158506516379007%	0.617918	1	0.986535
	Taurine and hypotaurine metabolism	ko00430	3 out of 1279 0.234558248631744%	27.0 out of 11356 0.23775977456851%	0.599968	1	0.986535
	Nitrogen metabolism	ko00910	10 out of 1279 0.781860828772479%	92.0 out of 11356 0.810144417048256%	0.596947	1	0.965088
	Sulfur relay system	ko04122	3 out of 1279 0.234558248631744%	28.0 out of 11356 0.246565692145122%	0.625285	1	0.951301
	Glycolysis / Gluconeogenesis	ko00010	40 out of 1279 3.12744331508991%	374.0 out of 11356 3.29341317365269%	0.66266	1	0.949606
	SNARE interactions in vesicular transport	ko04130	7 out of 1279 0.547302580140735%	68.0 out of 11356 0.598802395209581%	0.657044	1	0.913995
	Degradation of aromatic compounds	ko01220	4 out of 1279 0.312744331508991%	39.0 out of 11356 0.343430785487848%	0.654235	1	0.910647
	Porphyrin and chlorophyll metabolism	ko00860	10 out of 1279 0.781860828772479%	98.0 out of 11356 0.862979922507925%	0.677725	1	0.906001
	Inositol phosphate metabolism	ko00562	15 out of 1279 1.17279124315872%	148.0 out of 11356 1.3032758013385%	0.707012	1	0.89988
	Ubiquinone and other terpenoid-quinone biosynthesis	ko00130	7 out of 1279 0.547302580140735%	70.0 out of 11356 0.616414230362804%	0.687192	1	0.887881
	Purine metabolism	ko00230	39 out of 1279 3.04925723221267%	401.0 out of 11356 3.5311729482212%	0.858895	1	0.863525
	Histidine metabolism	ko00340	7 out of 1279 0.547302580140735%	72.0 out of 11356 0.634026065516027%	0.715588	1	0.863218
	Alanine, aspartate and glutamate metabolism	ko00250	20 out of 1279 1.56372165754496%	207.0 out of 11356 1.82282493835858%	0.799183	1	0.857856
	mRNA surveillance pathway	ko03015	22 out of 1279 1.72009382329945%	230.0 out of 11356 2.02536104262064%	0.822536	1	0.849278
	Nicotinate and nicotinamide metabolism	ko00760	5 out of 1279 0.390930414386239%	53.0 out of 11356 0.466713631560409%	0.72733	1	0.837624
	Biosynthesis of amino acids	ko01230	68 out of 1279 5.31665363565285%	727.0 out of 11356 6.40190207819655%	0.962017	1	0.83048
	Butanoate metabolism	ko00650	7 out of 1279 0.547302580140735%	75.0 out of 11356 0.660443818245861%	0.75482	1	0.828689
	Pyrimidine metabolism	ko00240	29 out of 1279 2.26739640344019%	311.0 out of 11356 2.73864036632617%	0.884533	1	0.827928
	Pentose phosphate pathway	ko00030	15 out of 1279 1.17279124315872%	163.0 out of 11356 1.43536456498767%	0.831901	1	0.817069
	Other types of O-glycan biosynthesis	ko00514	2 out of 1279 0.156372165754496%	22.0 out of 11356 0.193730186685453%	0.726614	1	0.807165
	Pyruvate metabolism	ko00620	24 out of 1279 1.87646598905395%	266.0 out of 11356 2.34237407537865%	0.900609	1	0.801096
	Cysteine and methionine metabolism	ko00270	25 out of 1279 1.9546520719312%	278.0 out of 11356 2.44804508629799%	0.907898	1	0.798454
	Phosphatidylinositol signaling system	ko04070	12 out of 1279 0.938232994526974%	134.0 out of 11356 1.17999295526594%	0.83846	1	0.795117
	RNA polymerase	ko03020	9 out of 1279 0.703674745895231%	102.0 out of 11356 0.898203592814371%	0.825596	1	0.783425
	Synthesis and degradation of ketone bodies	ko00072	2 out of 1279 0.156372165754496%	23.0 out of 11356 0.202536104262064%	0.749324	1	0.772071
	Ubiquitin mediated proteolysis	ko04120	24 out of 1279 1.87646598905395%	284.0 out of 11356 2.50088059175766%	0.951253	1	0.750322
	Fatty acid degradation	ko00071	14 out of 1279 1.09460516028147%	171.0 out of 11356 1.50581190560056%	0.925096	1	0.72692
	Sphingolipid metabolism	ko00600	8 out of 1279 0.625488663017983%	103.0 out of 11356 0.907009510390983%	0.90623	1	0.689616
	Carbon fixation in photosynthetic organisms	ko00710	19 out of 1279 1.48553557466771%	246.0 out of 11356 2.16625572384642%	0.974667	1	0.685762
	Lysine biosynthesis	ko00300	3 out of 1279 0.234558248631744%	39.0 out of 11356 0.343430785487848%	0.831169	1	0.682986
	N-Glycan biosynthesis	ko00510	8 out of 1279 0.625488663017983%	106.0 out of 11356 0.933427263120817%	0.921459	1	0.670099
	Protein processing in endoplasmic reticulum	ko04141	49 out of 1279 3.83111806098514%	654.0 out of 11356 5.75907009510391%	0.99962	1	0.665232
	Regulation of autophagy	ko04140	6 out of 1279 0.469116497263487%	82.0 out of 11356 0.722085241282142%	0.911985	1	0.649669
	2-Oxocarboxylic acid metabolism	ko01210	15 out of 1279 1.17279124315872%	208.0 out of 11356 1.83163085593519%	0.981048	1	0.640299
	Isoquinoline alkaloid biosynthesis	ko00950	3 out of 1279 0.234558248631744%	43.0 out of 11356 0.378654455794294%	0.877203	1	0.619452
	Peroxisome	ko04146	19 out of 1279 1.48553557466771%	277.0 out of 11356 2.43923916872138%	0.995213	1	0.609016
	Tropane, piperidine and pyridine alkaloid biosynthesis	ko00960	3 out of 1279 0.234558248631744%	44.0 out of 11356 0.387460373370905%	0.886814	1	0.605374
	Spliceosome	ko03040	33 out of 1279 2.58014073494918%	499.0 out of 11356 4.39415287072913%	0.999876	1	0.587176
	Carbon metabolism	ko01200	57 out of 1279 4.45660672400313%	863.0 out of 11356 7.59950686861571%	0.999999	1	0.586434
	Phagosome	ko04145	23 out of 1279 1.7982799061767%	349.0 out of 11356 3.07326523423741%	0.998981	1	0.585137
	RNA transport	ko03013	27 out of 1279 2.11102423768569%	435.0 out of 11356 3.830574145826%	0.999909	1	0.551099
	Propanoate metabolism	ko00640	8 out of 1279 0.625488663017983%	129.0 out of 11356 1.13596336738288%	0.982367	1	0.550624
	Lysine degradation	ko00310	7 out of 1279 0.547302580140735%	118.0 out of 11356 1.03909827404016%	0.983705	1	0.526709
	Tryptophan metabolism	ko00380	7 out of 1279 0.547302580140735%	124.0 out of 11356 1.09193377949982%	0.989552	1	0.501223
	One carbon pool by folate	ko00670	3 out of 1279 0.234558248631744%	54.0 out of 11356 0.47551954913702%	0.951646	1	0.493267
	Protein export	ko03060	6 out of 1279 0.469116497263487%	109.0 out of 11356 0.959845015850652%	0.987452	1	0.488742
	Valine, leucine and isoleucine degradation	ko00280	11 out of 1279 0.860046911649726%	204.0 out of 11356 1.79640718562874%	0.998846	1	0.478759
	Oxidative phosphorylation	ko00190	27 out of 1279 2.11102423768569%	572.0 out of 11356 5.03698485382177%	1	1	0.419105
	Glyoxylate and dicarboxylate metabolism	ko00630	12 out of 1279 0.938232994526974%	260.0 out of 11356 2.28953856991899%	0.999958	1	0.409791
	Photosynthesis - antenna proteins	ko00196	2 out of 1279 0.156372165754496%	46.0 out of 11356 0.405072208524128%	0.972174	1	0.386035
	Sulfur metabolism	ko00920	4 out of 1279 0.312744331508991%	92.0 out of 11356 0.810144417048256%	0.994472	1	0.386035
	Ribosome	ko03010	66 out of 1279 5.16028146989836%	1644.0 out of 11356 14.4769284959493%	1	1	0.356449
	Aminoacyl-tRNA biosynthesis	ko00970	7 out of 1279 0.547302580140735%	192.0 out of 11356 1.6907361747094%	0.999966	1	0.323707
	Citrate cycle (TCA cycle)	ko00020	9 out of 1279 0.703674745895231%	307.0 out of 11356 2.70341669601973%	1	1	0.260291
	Selenocompound metabolism	ko00450	1 out of 1279 0.0781860828772478%	77.0 out of 11356 0.678055653399084%	0.999902	1	0.115309
24h	Phenylpropanoid biosynthesis	ko00940	52 out of 514 10.1167315175097%	285.0 out of 11356 2.50968650933427%	7.09988e-13	7.80986e-11	4.03107
	Phenylalanine metabolism	ko00360	37 out of 514 7.19844357976654%	228.0 out of 11356 2.00774920746742%	1.11147e-11	1.22261e-09	3.58533
	Diterpenoid biosynthesis	ko00904	12 out of 514 2.33463035019455%	37.0 out of 11356 0.325818950334625%	4.27702e-08	4.70473e-06	7.16542
	Cyanoamino acid metabolism	ko00460	19 out of 514 3.69649805447471%	108.0 out of 11356 0.95103909827404%	3.19183e-07	3.51101e-05	3.8868
	Plant hormone signal transduction	ko04075	28 out of 514 5.44747081712062%	215.0 out of 11356 1.89327227897147%	4.29184e-07	4.72102e-05	2.87728
	Glycosaminoglycan degradation	ko00531	9 out of 514 1.75097276264591%	29.0 out of 11356 0.255371609721733%	3.30558e-06	0.000363613	6.85657
	Photosynthesis	ko00195	19 out of 514 3.69649805447471%	129.0 out of 11356 1.13596336738288%	5.1415e-06	0.000565565	3.25406
	Terpenoid backbone biosynthesis	ko00900	15 out of 514 2.91828793774319%	103.0 out of 11356 0.907009510390983%	5.74961e-05	0.00632457	3.21748
	Starch and sucrose metabolism	ko00500	31 out of 514 6.03112840466926%	332.0 out of 11356 2.92356463543501%	0.000104263	0.0114689	2.06294
	Linoleic acid metabolism	ko00591	8 out of 514 1.55642023346304%	35.0 out of 11356 0.308207115181402%	0.00013294	0.0146234	5.04992
	Glutathione metabolism	ko00480	25 out of 514 4.86381322957198%	252.0 out of 11356 2.21909122930609%	0.000190099	0.0209108	2.1918
	Monoterpenoid biosynthesis	ko00902	4 out of 514 0.778210116731518%	8.0 out of 11356 0.0704473406128919%	0.000251048	0.0276153	11.0467
	Thiamine metabolism	ko00730	6 out of 514 1.16731517509728%	28.0 out of 11356 0.246565692145122%	0.00134201	0.147622	4.7343
	Circadian rhythm - plant	ko04712	8 out of 514 1.55642023346304%	57.0 out of 11356 0.501937301866854%	0.00390118	0.42913	3.10083
	Flavonoid biosynthesis	ko00941	8 out of 514 1.55642023346304%	57.0 out of 11356 0.501937301866854%	0.00390118	0.42913	3.10083
	Photosynthesis - antenna proteins	ko00196	7 out of 514 1.36186770428016%	46.0 out of 11356 0.405072208524128%	0.00431111	0.474222	3.36204
	Porphyrin and chlorophyll metabolism	ko00860	11 out of 514 2.14007782101167%	98.0 out of 11356 0.862979922507925%	0.00466575	0.513233	2.47987
	Zeatin biosynthesis	ko00908	4 out of 514 0.778210116731518%	19.0 out of 11356 0.167312433955618%	0.00934654	1	4.65124
	Stilbenoid, diarylheptanoid and gingerol biosynthesis	ko00945	4 out of 514 0.778210116731518%	24.0 out of 11356 0.211342021838676%	0.0214456	1	3.68223
	Vitamin B6 metabolism	ko00750	4 out of 514 0.778210116731518%	27.0 out of 11356 0.23775977456851%	0.0318566	1	3.27309
	Arachidonic acid metabolism	ko00590	6 out of 514 1.16731517509728%	47.0 out of 11356 0.41387812610074%	0.0185616	1	2.82043
	Brassinosteroid biosynthesis	ko00905	2 out of 514 0.389105058365759%	17.0 out of 11356 0.149700598802395%	0.178191	1	2.59922
	Taurine and hypotaurine metabolism	ko00430	3 out of 514 0.583657587548638%	27.0 out of 11356 0.23775977456851%	0.121061	1	2.45482
	Flavone and flavonol biosynthesis	ko00944	1 out of 514 0.194552529182879%	9.0 out of 11356 0.0792532581895034%	0.340992	1	2.45482
	ABC transporters	ko02010	8 out of 514 1.55642023346304%	76.0 out of 11356 0.669249735822473%	0.0211733	1	2.32562
	Degradation of aromatic compounds	ko01220	4 out of 514 0.778210116731518%	39.0 out of 11356 0.343430785487848%	0.098294	1	2.26599
	Tyrosine metabolism	ko00350	12 out of 514 2.33463035019455%	122.0 out of 11356 1.0743219443466%	0.00916222	1	2.17312
	Nitrogen metabolism	ko00910	9 out of 514 1.75097276264591%	92.0 out of 11356 0.810144417048256%	0.0231321	1	2.16131
	Carotenoid biosynthesis	ko00906	4 out of 514 0.778210116731518%	44.0 out of 11356 0.387460373370905%	0.13671	1	2.00849
	Folate biosynthesis	ko00790	3 out of 514 0.583657587548638%	34.0 out of 11356 0.29940119760479%	0.197986	1	1.94942
	Cutin, suberine and wax biosynthesis	ko00073	3 out of 514 0.583657587548638%	34.0 out of 11356 0.29940119760479%	0.197986	1	1.94942
	Base excision repair	ko03410	7 out of 514 1.36186770428016%	80.0 out of 11356 0.704473406128919%	0.0697038	1	1.93317
	alpha-Linolenic acid metabolism	ko00592	9 out of 514 1.75097276264591%	106.0 out of 11356 0.933427263120817%	0.050627	1	1.87585
	Plant-pathogen interaction	ko04626	15 out of 514 2.91828793774319%	181.0 out of 11356 1.59387108136668%	0.0173954	1	1.83094
	Ascorbate and aldarate metabolism	ko00053	8 out of 514 1.55642023346304%	99.0 out of 11356 0.871785840084537%	0.0793726	1	1.78532
	Nicotinate and nicotinamide metabolism	ko00760	4 out of 514 0.778210116731518%	53.0 out of 11356 0.466713631560409%	0.217741	1	1.66743
	Phenylalanine, tyrosine and tryptophan biosynthesis	ko00400	7 out of 514 1.36186770428016%	93.0 out of 11356 0.818950334624868%	0.127941	1	1.66294
	Fructose and mannose metabolism	ko00051	10 out of 514 1.94552529182879%	140.0 out of 11356 1.23282846072561%	0.102741	1	1.5781
	Glycosphingolipid biosynthesis - ganglio series	ko00604	1 out of 514 0.194552529182879%	14.0 out of 11356 0.123282846072561%	0.47735	1	1.5781
	Limonene and pinene degradation	ko00903	2 out of 514 0.389105058365759%	28.0 out of 11356 0.246565692145122%	0.363848	1	1.5781
	beta-Alanine metabolism	ko00410	10 out of 514 1.94552529182879%	142.0 out of 11356 1.25044029587883%	0.110107	1	1.55587
	Biotin metabolism	ko00780	3 out of 514 0.583657587548638%	43.0 out of 11356 0.378654455794294%	0.308345	1	1.5414
	Glycine, serine and threonine metabolism	ko00260	14 out of 514 2.72373540856031%	202.0 out of 11356 1.77879535047552%	0.0746868	1	1.53122
	Amino sugar and nucleotide sugar metabolism	ko00520	19 out of 514 3.69649805447471%	277.0 out of 11356 2.43923916872138%	0.0468561	1	1.51543
	Arginine and proline metabolism	ko00330	16 out of 514 3.11284046692607%	239.0 out of 11356 2.10461430081014%	0.0762103	1	1.47906
	Glycolysis / Gluconeogenesis	ko00010	25 out of 514 4.86381322957198%	374.0 out of 11356 3.29341317365269%	0.0330793	1	1.47683
	Fatty acid biosynthesis	ko00061	7 out of 514 1.36186770428016%	107.0 out of 11356 0.942233180697429%	0.210582	1	1.44536
	Alanine, aspartate and glutamate metabolism	ko00250	13 out of 514 2.52918287937743%	207.0 out of 11356 1.82282493835858%	0.145715	1	1.38751
	Pentose phosphate pathway	ko00030	10 out of 514 1.94552529182879%	163.0 out of 11356 1.43536456498767%	0.204168	1	1.35542
	Ubiquinone and other terpenoid-quinone biosynthesis	ko00130	4 out of 514 0.778210116731518%	70.0 out of 11356 0.616414230362804%	0.39136	1	1.26248
	Carbon fixation in photosynthetic organisms	ko00710	14 out of 514 2.72373540856031%	246.0 out of 11356 2.16625572384642%	0.225148	1	1.25735
	Glycerophospholipid metabolism	ko00564	10 out of 514 1.94552529182879%	183.0 out of 11356 1.6114829165199%	0.31607	1	1.20729
	Other glycan degradation	ko00511	3 out of 514 0.583657587548638%	55.0 out of 11356 0.484325466713632%	0.456663	1	1.20509
	Pantothenate and CoA biosynthesis	ko00770	4 out of 514 0.778210116731518%	74.0 out of 11356 0.65163790066925%	0.43254	1	1.19424
	Butanoate metabolism	ko00650	4 out of 514 0.778210116731518%	75.0 out of 11356 0.660443818245861%	0.442726	1	1.17831
	Glycerolipid metabolism	ko00561	8 out of 514 1.55642023346304%	154.0 out of 11356 1.35611130679817%	0.396667	1	1.14771
	Ether lipid metabolism	ko00565	3 out of 514 0.583657587548638%	60.0 out of 11356 0.528355054596689%	0.514715	1	1.10467
	Galactose metabolism	ko00052	7 out of 514 1.36186770428016%	141.0 out of 11356 1.24163437830222%	0.45655	1	1.09683
	Steroid biosynthesis	ko00100	5 out of 514 0.972762645914397%	106.0 out of 11356 0.933427263120817%	0.527371	1	1.04214
	Fatty acid degradation	ko00071	8 out of 514 1.55642023346304%	171.0 out of 11356 1.50581190560056%	0.513418	1	1.03361
	Tropane, piperidine and pyridine alkaloid biosynthesis	ko00960	2 out of 514 0.389105058365759%	44.0 out of 11356 0.387460373370905%	0.598454	1	1.00424
	Carbon metabolism	ko01200	39 out of 514 7.5875486381323%	863.0 out of 11356 7.59950686861571%	0.529419	1	0.998426
	Biosynthesis of amino acids	ko01230	32 out of 514 6.22568093385214%	727.0 out of 11356 6.40190207819655%	0.593367	1	0.972474
	Pentose and glucuronate interconversions	ko00040	8 out of 514 1.55642023346304%	183.0 out of 11356 1.6114829165199%	0.591181	1	0.965831
	Sulfur metabolism	ko00920	4 out of 514 0.778210116731518%	92.0 out of 11356 0.810144417048256%	0.603847	1	0.960582
	Peroxisome	ko04146	12 out of 514 2.33463035019455%	277.0 out of 11356 2.43923916872138%	0.604239	1	0.957114
	Histidine metabolism	ko00340	3 out of 514 0.583657587548638%	72.0 out of 11356 0.634026065516027%	0.63901	1	0.920558
	Pyruvate metabolism	ko00620	11 out of 514 2.14007782101167%	266.0 out of 11356 2.34237407537865%	0.664381	1	0.913636
	Valine, leucine and isoleucine biosynthesis	ko00290	3 out of 514 0.583657587548638%	73.0 out of 11356 0.642831983092638%	0.648297	1	0.907947
	Fatty acid metabolism	ko01212	9 out of 514 1.75097276264591%	225.0 out of 11356 1.98133145473758%	0.695376	1	0.883735
	Phosphatidylinositol signaling system	ko04070	5 out of 514 0.972762645914397%	134.0 out of 11356 1.17999295526594%	0.731424	1	0.82438
	Mismatch repair	ko03430	3 out of 514 0.583657587548638%	82.0 out of 11356 0.722085241282142%	0.724203	1	0.808295
	Biosynthesis of unsaturated fatty acids	ko01040	4 out of 514 0.778210116731518%	110.0 out of 11356 0.968650933427263%	0.739823	1	0.803396
	Lysine degradation	ko00310	4 out of 514 0.778210116731518%	118.0 out of 11356 1.03909827404016%	0.78766	1	0.748928
	Inositol phosphate metabolism	ko00562	5 out of 514 0.972762645914397%	148.0 out of 11356 1.3032758013385%	0.805965	1	0.746398
	Cysteine and methionine metabolism	ko00270	9 out of 514 1.75097276264591%	278.0 out of 11356 2.44804508629799%	0.888167	1	0.715253
	Endocytosis	ko04144	12 out of 514 2.33463035019455%	371.0 out of 11356 3.26699542092286%	0.916283	1	0.714611
	Tryptophan metabolism	ko00380	4 out of 514 0.778210116731518%	124.0 out of 11356 1.09193377949982%	0.818725	1	0.71269
	Riboflavin metabolism	ko00740	1 out of 514 0.194552529182879%	33.0 out of 11356 0.290595280028179%	0.783622	1	0.669497
	SNARE interactions in vesicular transport	ko04130	2 out of 514 0.389105058365759%	68.0 out of 11356 0.598802395209581%	0.819814	1	0.649805
	Sphingolipid metabolism	ko00600	3 out of 514 0.583657587548638%	103.0 out of 11356 0.907009510390983%	0.851335	1	0.643497
	N-Glycan biosynthesis	ko00510	3 out of 514 0.583657587548638%	106.0 out of 11356 0.933427263120817%	0.864559	1	0.625284
	Lysine biosynthesis	ko00300	1 out of 514 0.194552529182879%	39.0 out of 11356 0.343430785487848%	0.836269	1	0.566497
	2-Oxocarboxylic acid metabolism	ko01210	5 out of 514 0.972762645914397%	208.0 out of 11356 1.83163085593519%	0.962031	1	0.531091
	Glycosphingolipid biosynthesis - globo series	ko00603	1 out of 514 0.194552529182879%	42.0 out of 11356 0.369848538217682%	0.857582	1	0.526033
	Nucleotide excision repair	ko03420	3 out of 514 0.583657587548638%	128.0 out of 11356 1.12715744980627%	0.933623	1	0.517814
	DNA replication	ko03030	3 out of 514 0.583657587548638%	128.0 out of 11356 1.12715744980627%	0.933623	1	0.517814
	Propanoate metabolism	ko00640	3 out of 514 0.583657587548638%	129.0 out of 11356 1.13596336738288%	0.935812	1	0.5138
	Isoquinoline alkaloid biosynthesis	ko00950	1 out of 514 0.194552529182879%	43.0 out of 11356 0.378654455794294%	0.864052	1	0.5138
	Glyoxylate and dicarboxylate metabolism	ko00630	6 out of 514 1.16731517509728%	260.0 out of 11356 2.28953856991899%	0.979754	1	0.509847
	Phagosome	ko04145	7 out of 514 1.36186770428016%	349.0 out of 11356 3.07326523423741%	0.996451	1	0.443134
	Purine metabolism	ko00230	8 out of 514 1.55642023346304%	401.0 out of 11356 3.5311729482212%	0.998059	1	0.440766
	Protein processing in endoplasmic reticulum	ko04141	13 out of 514 2.52918287937743%	654.0 out of 11356 5.75907009510391%	0.999882	1	0.439165
	Pyrimidine metabolism	ko00240	6 out of 514 1.16731517509728%	311.0 out of 11356 2.73864036632617%	0.995838	1	0.426239
	One carbon pool by folate	ko00670	1 out of 514 0.194552529182879%	54.0 out of 11356 0.47551954913702%	0.918504	1	0.409137
	Citrate cycle (TCA cycle)	ko00020	5 out of 514 0.972762645914397%	307.0 out of 11356 2.70341669601973%	0.998519	1	0.359827
	Aminoacyl-tRNA biosynthesis	ko00970	3 out of 514 0.583657587548638%	192.0 out of 11356 1.6907361747094%	0.99328	1	0.345209
	RNA degradation	ko03018	4 out of 514 0.778210116731518%	263.0 out of 11356 2.31595632264882%	0.998068	1	0.336021
	Selenocompound metabolism	ko00450	1 out of 514 0.194552529182879%	77.0 out of 11356 0.678055653399084%	0.972091	1	0.286927
	Homologous recombination	ko03440	1 out of 514 0.194552529182879%	79.0 out of 11356 0.695667488552307%	0.974577	1	0.279663
	Oxidative phosphorylation	ko00190	7 out of 514 1.36186770428016%	572.0 out of 11356 5.03698485382177%	0.999999	1	0.270374
	Basal transcription factors	ko03022	1 out of 514 0.194552529182879%	86.0 out of 11356 0.757308911588587%	0.981661	1	0.2569
	Ubiquitin mediated proteolysis	ko04120	3 out of 514 0.583657587548638%	284.0 out of 11356 2.50088059175766%	0.999821	1	0.233381
	Protein export	ko03060	1 out of 514 0.194552529182879%	109.0 out of 11356 0.959845015850652%	0.993739	1	0.202692
	mRNA surveillance pathway	ko03015	2 out of 514 0.389105058365759%	230.0 out of 11356 2.02536104262064%	0.999743	1	0.192116
	Spliceosome	ko03040	3 out of 514 0.583657587548638%	499.0 out of 11356 4.39415287072913%	1	1	0.132826
	Valine, leucine and isoleucine degradation	ko00280	1 out of 514 0.194552529182879%	204.0 out of 11356 1.79640718562874%	0.999928	1	0.108301
	Ribosome biogenesis in eukaryotes	ko03008	1 out of 514 0.194552529182879%	259.0 out of 11356 2.28073265234237%	0.999995	1	0.0853026
	Ribosome	ko03010	5 out of 514 0.972762645914397%	1644.0 out of 11356 14.4769284959493%	1	1	0.067194
	RNA transport	ko03013	1 out of 514 0.194552529182879%	435.0 out of 11356 3.830574145826%	1	1	0.0507894
5d	Oxidative phosphorylation	ko00190	15 out of 60 25%	572.0 out of 11356 5.03698485382177%	1.83377e-07	6.60157e-06	4.96329
	Glutathione metabolism	ko00480	5 out of 60 8.33333333333333%	252.0 out of 11356 2.21909122930609%	0.0104707	0.376945	3.75529
	Folate biosynthesis	ko00790	1 out of 60 1.66666666666667%	34.0 out of 11356 0.29940119760479%	0.165047	1	5.56667
	Photosynthesis - antenna proteins	ko00196	1 out of 60 1.66666666666667%	46.0 out of 11356 0.405072208524128%	0.216648	1	4.11449
	Arachidonic acid metabolism	ko00590	1 out of 60 1.66666666666667%	47.0 out of 11356 0.41387812610074%	0.220804	1	4.02695
	Other glycan degradation	ko00511	1 out of 60 1.66666666666667%	55.0 out of 11356 0.484325466713632%	0.253278	1	3.44121
	Galactose metabolism	ko00052	2 out of 60 3.33333333333333%	141.0 out of 11356 1.24163437830222%	0.170758	1	2.68463
	Selenocompound metabolism	ko00450	1 out of 60 1.66666666666667%	77.0 out of 11356 0.678055653399084%	0.335876	1	2.45801
	Base excision repair	ko03410	1 out of 60 1.66666666666667%	80.0 out of 11356 0.704473406128919%	0.34642	1	2.36583
	Carbon fixation in photosynthetic organisms	ko00710	3 out of 60 5%	246.0 out of 11356 2.16625572384642%	0.140601	1	2.30813
	Glyoxylate and dicarboxylate metabolism	ko00630	3 out of 60 5%	260.0 out of 11356 2.28953856991899%	0.158019	1	2.18385
	Pyruvate metabolism	ko00620	3 out of 60 5%	266.0 out of 11356 2.34237407537865%	0.165683	1	2.13459
	Plant-pathogen interaction	ko04626	2 out of 60 3.33333333333333%	181.0 out of 11356 1.59387108136668%	0.247981	1	2.09134
	Sulfur metabolism	ko00920	1 out of 60 1.66666666666667%	92.0 out of 11356 0.810144417048256%	0.386972	1	2.05725
	Glycolysis / Gluconeogenesis	ko00010	4 out of 60 6.66666666666667%	374.0 out of 11356 3.29341317365269%	0.134983	1	2.02424
	Sphingolipid metabolism	ko00600	1 out of 60 1.66666666666667%	103.0 out of 11356 0.907009510390983%	0.421965	1	1.83754
	Fatty acid biosynthesis	ko00061	1 out of 60 1.66666666666667%	107.0 out of 11356 0.942233180697429%	0.434196	1	1.76885
	RNA transport	ko03013	4 out of 60 6.66666666666667%	435.0 out of 11356 3.830574145826%	0.197071	1	1.74038
	Phenylalanine metabolism	ko00360	2 out of 60 3.33333333333333%	228.0 out of 11356 2.00774920746742%	0.339973	1	1.66023
	Carbon metabolism	ko01200	7 out of 60 11.6666666666667%	863.0 out of 11356 7.59950686861571%	0.168525	1	1.53519
	Ribosome	ko03010	13 out of 60 21.6666666666667%	1644.0 out of 11356 14.4769284959493%	0.0851481	1	1.49663
	Propanoate metabolism	ko00640	1 out of 60 1.66666666666667%	129.0 out of 11356 1.13596336738288%	0.497056	1	1.46718
	Phosphatidylinositol signaling system	ko04070	1 out of 60 1.66666666666667%	134.0 out of 11356 1.17999295526594%	0.510355	1	1.41244
	Fructose and mannose metabolism	ko00051	1 out of 60 1.66666666666667%	140.0 out of 11356 1.23282846072561%	0.525857	1	1.3519
	Phenylpropanoid biosynthesis	ko00940	2 out of 60 3.33333333333333%	285.0 out of 11356 2.50968650933427%	0.446695	1	1.32819
	Pentose phosphate pathway	ko00030	1 out of 60 1.66666666666667%	163.0 out of 11356 1.43536456498767%	0.580938	1	1.16115
	Starch and sucrose metabolism	ko00500	2 out of 60 3.33333333333333%	332.0 out of 11356 2.92356463543501%	0.527369	1	1.14016
	Fatty acid degradation	ko00071	1 out of 60 1.66666666666667%	171.0 out of 11356 1.50581190560056%	0.598581	1	1.10682
	Phagosome	ko04145	2 out of 60 3.33333333333333%	349.0 out of 11356 3.07326523423741%	0.554597	1	1.08462
	Purine metabolism	ko00230	2 out of 60 3.33333333333333%	401.0 out of 11356 3.5311729482212%	0.631033	1	0.943973
	Fatty acid metabolism	ko01212	1 out of 60 1.66666666666667%	225.0 out of 11356 1.98133145473758%	0.699977	1	0.841185
	Biosynthesis of amino acids	ko01230	3 out of 60 5%	727.0 out of 11356 6.40190207819655%	0.748051	1	0.781018
	RNA degradation	ko03018	1 out of 60 1.66666666666667%	263.0 out of 11356 2.31595632264882%	0.755765	1	0.719645
	Peroxisome	ko04146	1 out of 60 1.66666666666667%	277.0 out of 11356 2.43923916872138%	0.773633	1	0.683273
	Cysteine and methionine metabolism	ko00270	1 out of 60 1.66666666666667%	278.0 out of 11356 2.44804508629799%	0.774859	1	0.680815
	Protein processing in endoplasmic reticulum	ko04141	2 out of 60 3.33333333333333%	654.0 out of 11356 5.75907009510391%	0.867837	1	0.578797
15d	Amino sugar and nucleotide sugar metabolism	ko00520	9 out of 48 18.75%	277.0 out of 11356 2.43923916872138%	1.95581e-06	6.84533e-05	7.68682
	Linoleic acid metabolism	ko00591	3 out of 48 6.25%	35.0 out of 11356 0.308207115181402%	0.000421845	0.0147646	20.2786
	Nitrogen metabolism	ko00910	4 out of 48 8.33333333333333%	92.0 out of 11356 0.810144417048256%	0.000597734	0.0209207	10.2862
	Phenylpropanoid biosynthesis	ko00940	6 out of 48 12.5%	285.0 out of 11356 2.50968650933427%	0.0011994	0.0419789	4.9807
	Phenylalanine metabolism	ko00360	5 out of 48 10.4166666666667%	228.0 out of 11356 2.00774920746742%	0.00264757	0.0926648	5.18823
	Riboflavin metabolism	ko00740	2 out of 48 4.16666666666667%	33.0 out of 11356 0.290595280028179%	0.00849764	0.297418	14.3384
	Carotenoid biosynthesis	ko00906	2 out of 48 4.16666666666667%	44.0 out of 11356 0.387460373370905%	0.0147831	0.517407	10.7538
	Zeatin biosynthesis	ko00908	1 out of 48 2.08333333333333%	19.0 out of 11356 0.167312433955618%	0.0773858	1	12.4518
	Stilbenoid, diarylheptanoid and gingerol biosynthesis	ko00945	1 out of 48 2.08333333333333%	24.0 out of 11356 0.211342021838676%	0.0967559	1	9.85764
	Limonene and pinene degradation	ko00903	1 out of 48 2.08333333333333%	28.0 out of 11356 0.246565692145122%	0.111965	1	8.4494
	Isoquinoline alkaloid biosynthesis	ko00950	1 out of 48 2.08333333333333%	43.0 out of 11356 0.378654455794294%	0.166797	1	5.50194
	Tropane, piperidine and pyridine alkaloid biosynthesis	ko00960	1 out of 48 2.08333333333333%	44.0 out of 11356 0.387460373370905%	0.170332	1	5.37689
	Nicotinate and nicotinamide metabolism	ko00760	1 out of 48 2.08333333333333%	53.0 out of 11356 0.466713631560409%	0.201495	1	4.46384
	Cyanoamino acid metabolism	ko00460	2 out of 48 4.16666666666667%	108.0 out of 11356 0.95103909827404%	0.0762156	1	4.38117
	Alanine, aspartate and glutamate metabolism	ko00250	3 out of 48 6.25%	207.0 out of 11356 1.82282493835858%	0.0567548	1	3.42874
	beta-Alanine metabolism	ko00410	2 out of 48 4.16666666666667%	142.0 out of 11356 1.25044029587883%	0.120844	1	3.33216
	Plant hormone signal transduction	ko04075	3 out of 48 6.25%	215.0 out of 11356 1.89327227897147%	0.0621754	1	3.30116
	Arginine and proline metabolism	ko00330	3 out of 48 6.25%	239.0 out of 11356 2.10461430081014%	0.0798221	1	2.96967
	Regulation of autophagy	ko04140	1 out of 48 2.08333333333333%	82.0 out of 11356 0.722085241282142%	0.294313	1	2.88516
	Glycerophospholipid metabolism	ko00564	2 out of 48 4.16666666666667%	183.0 out of 11356 1.6114829165199%	0.180865	1	2.58561
	Starch and sucrose metabolism	ko00500	3 out of 48 6.25%	332.0 out of 11356 2.92356463543501%	0.164798	1	2.1378
	Tyrosine metabolism	ko00350	1 out of 48 2.08333333333333%	122.0 out of 11356 1.0743219443466%	0.40521	1	1.93921
	Glutathione metabolism	ko00480	2 out of 48 4.16666666666667%	252.0 out of 11356 2.21909122930609%	0.288486	1	1.87765
	Phosphatidylinositol signaling system	ko04070	1 out of 48 2.08333333333333%	134.0 out of 11356 1.17999295526594%	0.435014	1	1.76555
	Cysteine and methionine metabolism	ko00270	2 out of 48 4.16666666666667%	278.0 out of 11356 2.44804508629799%	0.329234	1	1.70204
	Inositol phosphate metabolism	ko00562	1 out of 48 2.08333333333333%	148.0 out of 11356 1.3032758013385%	0.467941	1	1.59854
	Glycerolipid metabolism	ko00561	1 out of 48 2.08333333333333%	154.0 out of 11356 1.35611130679817%	0.48147	1	1.53626
	Plant-pathogen interaction	ko04626	1 out of 48 2.08333333333333%	181.0 out of 11356 1.59387108136668%	0.538297	1	1.30709
	Pentose and glucuronate interconversions	ko00040	1 out of 48 2.08333333333333%	183.0 out of 11356 1.6114829165199%	0.542255	1	1.29281
	Glycine, serine and threonine metabolism	ko00260	1 out of 48 2.08333333333333%	202.0 out of 11356 1.77879535047552%	0.578237	1	1.1712
	Ubiquitin mediated proteolysis	ko04120	1 out of 48 2.08333333333333%	284.0 out of 11356 2.50088059175766%	0.704251	1	0.83304
	Pyrimidine metabolism	ko00240	1 out of 48 2.08333333333333%	311.0 out of 11356 2.73864036632617%	0.737023	1	0.760718
	Biosynthesis of amino acids	ko01230	2 out of 48 4.16666666666667%	727.0 out of 11356 6.40190207819655%	0.821725	1	0.650848
	Endocytosis	ko04144	1 out of 48 2.08333333333333%	371.0 out of 11356 3.26699542092286%	0.797641	1	0.637691
	RNA transport	ko03013	1 out of 48 2.08333333333333%	435.0 out of 11356 3.830574145826%	0.847224	1	0.54387

## Sheet: Table S7
	Table S7. GO classification analysis of 217 genes from turquoise, lightgreen and darkorange modules
#GO_classify1	GO_classify2	GO_ID	AllGene_number	Selected_gene_number	Selected_gene_ID
biological process	metabolic process	GO:0008152	17262	57	c240863.graph_c2;c193066.graph_c1;c205401.graph_c0;c234651.graph_c1;c212853.graph_c0;c211761.graph_c0;c235741.graph_c3;c243007.graph_c0;c235702.graph_c0;c204096.graph_c1;c231602.graph_c6;c194639.graph_c0;c127194.graph_c0;c232202.graph_c3;c203027.graph_c0;c233168.graph_c0;c223882.graph_c0;c238871.graph_c0;c222759.graph_c0;c242967.graph_c1;c237148.graph_c0;c238202.graph_c1;c237676.graph_c0;c237762.…
biological process	cellular process	GO:0009987	15859	41	c239838.graph_c1;c243144.graph_c1;c230374.graph_c0;c219994.graph_c0;c237801.graph_c1;c209571.graph_c0;c243080.graph_c1;c240752.graph_c0;c243550.graph_c1;c240707.graph_c0;c234627.graph_c0;c235658.graph_c0;c241514.graph_c0;c242808.graph_c0;c240335.graph_c4;c232534.graph_c0;c243643.graph_c1;c240548.graph_c2;c228300.graph_c0;c243074.graph_c4;c218510.graph_c0;c238871.graph_c0;c223882.graph_c0;c233168.…
biological process	single-organism process	GO:0044699	12284	48	c219994.graph_c0;c237801.graph_c1;c230374.graph_c0;c243144.graph_c1;c243749.graph_c0;c239838.graph_c1;c223138.graph_c1;c177571.graph_c0;c234627.graph_c0;c243550.graph_c1;c240707.graph_c0;c240752.graph_c0;c243080.graph_c1;c228300.graph_c0;c243036.graph_c2;c243643.graph_c1;c240548.graph_c2;c232534.graph_c0;c240335.graph_c4;c242808.graph_c0;c241514.graph_c0;c235658.graph_c0;c218510.graph_c0;c225900.…
biological process	localization	GO:0051179	4116	17	c243550.graph_c1;c240863.graph_c2;c242616.graph_c0;c240752.graph_c0;c239141.graph_c0;c237801.graph_c1;c238871.graph_c0;c239838.graph_c1;c217459.graph_c0;c243074.graph_c4;c243036.graph_c2;c240548.graph_c2;c213331.graph_c0;c240335.graph_c4;c243266.graph_c1;c242808.graph_c0;c231228.graph_c2
biological process	response to stimulus	GO:0050896	3917	20	c237961.graph_c1;c194639.graph_c0;c243080.graph_c1;c242616.graph_c0;c240863.graph_c2;c234627.graph_c0;c235658.graph_c0;c215238.graph_c0;c241514.graph_c0;c242808.graph_c0;c243266.graph_c1;c232534.graph_c0;c179635.graph_c0;c243036.graph_c2;c243074.graph_c4;c237676.graph_c0;c240743.graph_c3;c225900.graph_c0;c237148.graph_c0;c74682.graph_c0
biological process	biological regulation	GO:0065007	3911	14	c240863.graph_c2;c234627.graph_c0;c234651.graph_c1;c218510.graph_c0;c209571.graph_c0;c235702.graph_c0;c243074.graph_c4;c239141.graph_c0;c219994.graph_c0;c242808.graph_c0;c243266.graph_c1;c235658.graph_c0;c238871.graph_c0;c127638.graph_c0
biological process	cellular component organization or biogenesis	GO:0071840	2916	5	c228300.graph_c0;c219994.graph_c0;c193066.graph_c1;c240863.graph_c2;c218510.graph_c0
biological process	developmental process	GO:0032502	1668	6	c243749.graph_c0;c219994.graph_c0;c228300.graph_c0;c194639.graph_c0;c241514.graph_c0;c127638.graph_c0
biological process	multicellular organismal process	GO:0032501	1384	6	c228300.graph_c0;c219994.graph_c0;c243749.graph_c0;c127638.graph_c0;c241514.graph_c0;c194639.graph_c0
biological process	signaling	GO:0023052	1158	3	c234627.graph_c0;c240863.graph_c2;c235658.graph_c0
biological process	reproductive process	GO:0022414	807	2	c243749.graph_c0;c228300.graph_c0
biological process	multi-organism process	GO:0051704	727	5	c237961.graph_c1;c243749.graph_c0;c228300.graph_c0;c240863.graph_c2;c243266.graph_c1
biological process	growth	GO:0040007	403	1	c228300.graph_c0
biological process	reproduction	GO:0000003	395	0
biological process	immune system process	GO:0002376	224	1	c240863.graph_c2
biological process	biological adhesion	GO:0022610	39	0
biological process	biological phase	GO:0044848	34	0
biological process	rhythmic process	GO:0048511	30	0
biological process	locomotion	GO:0040011	14	0
biological process	cell killing	GO:0001906	10	0
cellular component	cell	GO:0005623	12065	38	c237961.graph_c1;c240000.graph_c1;c230374.graph_c0;c219994.graph_c0;c230464.graph_c1;c209571.graph_c0;c243080.graph_c1;c240707.graph_c0;c243550.graph_c1;c177571.graph_c0;c235658.graph_c0;c215238.graph_c0;c242808.graph_c0;c240335.graph_c4;c232534.graph_c0;c228300.graph_c0;c243074.graph_c4;c192129.graph_c1;c127638.graph_c0;c222759.graph_c0;c238871.graph_c0;c239141.graph_c0;c194639.graph_c0;c228974.…
cellular component	cell part	GO:0044464	12065	38	c243550.graph_c1;c240707.graph_c0;c177571.graph_c0;c243080.graph_c1;c209571.graph_c0;c219994.graph_c0;c230464.graph_c1;c237961.graph_c1;c240000.graph_c1;c230374.graph_c0;c192129.graph_c1;c243074.graph_c4;c228300.graph_c0;c232534.graph_c0;c242808.graph_c0;c240335.graph_c4;c215238.graph_c0;c235658.graph_c0;c193066.graph_c1;c240863.graph_c2;c205401.graph_c0;c212853.graph_c0;c235702.graph_c0;c231602.…
cellular component	organelle	GO:0043226	9174	27	c232758.graph_c1;c232534.graph_c0;c242808.graph_c0;c243266.graph_c1;c240335.graph_c4;c231390.graph_c0;c217459.graph_c0;c192129.graph_c1;c240743.graph_c3;c243074.graph_c4;c237676.graph_c0;c230464.graph_c1;c237961.graph_c1;c240000.graph_c1;c230374.graph_c0;c238871.graph_c0;c127638.graph_c0;c240863.graph_c2;c193066.graph_c1;c177571.graph_c0;c205401.graph_c0;c212853.graph_c0;c209571.graph_c0;c243080.…
cellular component	membrane	GO:0016020	5981	29	c231602.graph_c6;c194639.graph_c0;c240707.graph_c0;c243550.graph_c1;c193066.graph_c1;c234627.graph_c0;c240752.graph_c0;c240894.graph_c0;c242616.graph_c0;c127638.graph_c0;c219994.graph_c0;c239141.graph_c0;c237961.graph_c1;c240743.graph_c3;c243074.graph_c4;c231390.graph_c0;c192129.graph_c0;c192129.graph_c1;c238132.graph_c2;c227287.graph_c0;c240335.graph_c4;c215238.graph_c0;c235658.graph_c0;c231228.…
cellular component	macromolecular complex	GO:0032991	4313	4	c212853.graph_c0;c232534.graph_c0;c219994.graph_c0;c240335.graph_c4
cellular component	organelle part	GO:0044422	3894	8	c240335.graph_c4;c238871.graph_c0;c230374.graph_c0;c232534.graph_c0;c237961.graph_c1;c243074.graph_c4;c240863.graph_c2;c193066.graph_c1
cellular component	membrane part	GO:0044425	3333	11	c192129.graph_c0;c243550.graph_c1;c231390.graph_c0;c192129.graph_c1;c240752.graph_c0;c194639.graph_c0;c232866.graph_c0;c240548.graph_c2;c239141.graph_c0;c240335.graph_c4;c231228.graph_c2
cellular component	membrane-enclosed lumen	GO:0031974	903	0
cellular component	extracellular region	GO:0005576	734	3	c230464.graph_c1;c232534.graph_c0;c235658.graph_c0
cellular component	cell junction	GO:0030054	315	1	c243550.graph_c1
cellular component	symplast	GO:0055044	314	1	c243550.graph_c1
cellular component	nucleoid	GO:0009295	57	0
cellular component	extracellular region part	GO:0044421	13	0
cellular component	virion	GO:0019012	10	0
cellular component	virion part	GO:0044423	10	0
molecular function	catalytic activity	GO:0003824	15424	69	c243425.graph_c1;c236582.graph_c2;c237148.graph_c0;c237676.graph_c0;c233168.graph_c0;c241576.graph_c0;c194639.graph_c0;c127194.graph_c0;c205401.graph_c0;c209014.graph_c1;c242602.graph_c0;c211761.graph_c0;c242808.graph_c0;c227287.graph_c0;c234845.graph_c1;c235658.graph_c0;c239074.graph_c1;c241557.graph_c0;c225900.graph_c0;c226970.graph_c0;c243410.graph_c1;c235067.graph_c0;c226449.graph_c0;c243144.…
molecular function	binding	GO:0005488	13436	50	c233168.graph_c0;c223882.graph_c0;c232202.graph_c3;c203027.graph_c0;c194639.graph_c0;c243314.graph_c1;c204096.graph_c1;c243007.graph_c0;c231602.graph_c6;c235702.graph_c0;c234651.graph_c1;c211761.graph_c0;c235741.graph_c3;c240863.graph_c2;c205401.graph_c0;c209014.graph_c1;c221923.graph_c0;c243266.graph_c1;c237676.graph_c0;c240743.graph_c3;c236582.graph_c2;c242967.graph_c1;c223129.graph_c0;c230464.…
molecular function	transporter activity	GO:0005215	1862	7	c240335.graph_c4;c231228.graph_c2;c239141.graph_c0;c243550.graph_c1;c240548.graph_c2;c237801.graph_c1;c242616.graph_c0
molecular function	structural molecule activity	GO:0005198	1553	1	c212853.graph_c0
molecular function	nucleic acid binding transcription factor activity	GO:0001071	730	2	c243266.graph_c1;c235702.graph_c0
molecular function	electron carrier activity	GO:0009055	475	1	c243080.graph_c1
molecular function	antioxidant activity	GO:0016209	282	2	c225900.graph_c0;c237676.graph_c0
molecular function	molecular transducer activity	GO:0060089	243	1	c234627.graph_c0
molecular function	signal transducer activity	GO:0004871	243	1	c234627.graph_c0
molecular function	transcription factor activity, protein binding	GO:0000988	60	0
molecular function	metallochaperone activity	GO:0016530	18	0
molecular function	nutrient reservoir activity	GO:0045735	17	1	c230464.graph_c1
molecular function	protein tag	GO:0031386	6	0
molecular function	translation regulator activity	GO:0045182	2	0

## Sheet: Table S8
	Table S8. KEGG pathway analysis of 217 genes from turquoise, lightgreen and darkorange modules
#Kegg_pathway	ko_id	Cluster_frequency	Genome_frequency	P-value	Corrected_P-value	rich_factor
Terpenoid backbone biosynthesis	ko00900	6 out of 38 15.7894736842105%	103.0 out of 11356 0.907009510390983%	1.04907e-06	3.88157e-05	17.4083
Phenylpropanoid biosynthesis	ko00940	7 out of 38 18.4210526315789%	285.0 out of 11356 2.50968650933427%	3.77152e-05	0.00139546	7.33998
Diterpenoid biosynthesis	ko00904	3 out of 38 7.89473684210526%	37.0 out of 11356 0.325818950334625%	0.000248322	0.0091879	24.2304
Monoterpenoid biosynthesis	ko00902	1 out of 38 2.63157894736842%	8.0 out of 11356 0.0704473406128919%	0.0264666	0.979265	37.3553
Stilbenoid, diarylheptanoid and gingerol biosynthesis	ko00945	1 out of 38 2.63157894736842%	24.0 out of 11356 0.211342021838676%	0.0773694	1	12.4518
Vitamin B6 metabolism	ko00750	1 out of 38 2.63157894736842%	27.0 out of 11356 0.23775977456851%	0.0866208	1	11.0682
Thiamine metabolism	ko00730	1 out of 38 2.63157894736842%	28.0 out of 11356 0.246565692145122%	0.0896845	1	10.6729
Limonene and pinene degradation	ko00903	1 out of 38 2.63157894736842%	28.0 out of 11356 0.246565692145122%	0.0896845	1	10.6729
Nicotinate and nicotinamide metabolism	ko00760	1 out of 38 2.63157894736842%	53.0 out of 11356 0.466713631560409%	0.163105	1	5.63853
Cyanoamino acid metabolism	ko00460	2 out of 38 5.26315789473684%	108.0 out of 11356 0.95103909827404%	0.0504649	1	5.53411
Ether lipid metabolism	ko00565	1 out of 38 2.63157894736842%	60.0 out of 11356 0.528355054596689%	0.182608	1	4.9807
ABC transporters	ko02010	1 out of 38 2.63157894736842%	76.0 out of 11356 0.669249735822473%	0.225539	1	3.93213
Phenylalanine metabolism	ko00360	3 out of 38 7.89473684210526%	228.0 out of 11356 2.00774920746742%	0.0402549	1	3.93213
Sphingolipid metabolism	ko00600	1 out of 38 2.63157894736842%	103.0 out of 11356 0.907009510390983%	0.293056	1	2.90138
Alanine, aspartate and glutamate metabolism	ko00250	2 out of 38 5.26315789473684%	207.0 out of 11356 1.82282493835858%	0.152074	1	2.88736
N-Glycan biosynthesis	ko00510	1 out of 38 2.63157894736842%	106.0 out of 11356 0.933427263120817%	0.300194	1	2.81927
Plant hormone signal transduction	ko04075	2 out of 38 5.26315789473684%	215.0 out of 11356 1.89327227897147%	0.161455	1	2.77993
Starch and sucrose metabolism	ko00500	3 out of 38 7.89473684210526%	332.0 out of 11356 2.92356463543501%	0.0987714	1	2.70038
Glutathione metabolism	ko00480	2 out of 38 5.26315789473684%	252.0 out of 11356 2.21909122930609%	0.206063	1	2.37176
Propanoate metabolism	ko00640	1 out of 38 2.63157894736842%	129.0 out of 11356 1.13596336738288%	0.352638	1	2.31661
Photosynthesis	ko00195	1 out of 38 2.63157894736842%	129.0 out of 11356 1.13596336738288%	0.352638	1	2.31661
Cysteine and methionine metabolism	ko00270	2 out of 38 5.26315789473684%	278.0 out of 11356 2.44804508629799%	0.238207	1	2.14994
Galactose metabolism	ko00052	1 out of 38 2.63157894736842%	141.0 out of 11356 1.24163437830222%	0.37846	1	2.11945
Inositol phosphate metabolism	ko00562	1 out of 38 2.63157894736842%	148.0 out of 11356 1.3032758013385%	0.393057	1	2.0192
Pentose and glucuronate interconversions	ko00040	1 out of 38 2.63157894736842%	183.0 out of 11356 1.6114829165199%	0.461177	1	1.63302
Glycerophospholipid metabolism	ko00564	1 out of 38 2.63157894736842%	183.0 out of 11356 1.6114829165199%	0.461177	1	1.63302
Glycine, serine and threonine metabolism	ko00260	1 out of 38 2.63157894736842%	202.0 out of 11356 1.77879535047552%	0.494976	1	1.47942
Arginine and proline metabolism	ko00330	1 out of 38 2.63157894736842%	239.0 out of 11356 2.10461430081014%	0.554974	1	1.25039
Carbon fixation in photosynthetic organisms	ko00710	1 out of 38 2.63157894736842%	246.0 out of 11356 2.16625572384642%	0.565517	1	1.21481
Glyoxylate and dicarboxylate metabolism	ko00630	1 out of 38 2.63157894736842%	260.0 out of 11356 2.28953856991899%	0.585877	1	1.14939
Pyruvate metabolism	ko00620	1 out of 38 2.63157894736842%	266.0 out of 11356 2.34237407537865%	0.594316	1	1.12347
Glycolysis / Gluconeogenesis	ko00010	1 out of 38 2.63157894736842%	374.0 out of 11356 3.29341317365269%	0.72048	1	0.799043
Purine metabolism	ko00230	1 out of 38 2.63157894736842%	401.0 out of 11356 3.5311729482212%	0.745481	1	0.745242
Oxidative phosphorylation	ko00190	1 out of 38 2.63157894736842%	572.0 out of 11356 5.03698485382177%	0.860157	1	0.522451
Biosynthesis of amino acids	ko01230	1 out of 38 2.63157894736842%	727.0 out of 11356 6.40190207819655%	0.919406	1	0.411062
Carbon metabolism	ko01200	1 out of 38 2.63157894736842%	863.0 out of 11356 7.59950686861571%	0.950636	1	0.346283
Ribosome	ko03010	1 out of 38 2.63157894736842%	1644.0 out of 11356 14.4769284959493%	0.997402	1	0.181777

## Sheet: Table S9
			Table S9. The description of the hub genes
#ID	COG_class	COG_class_annotation	GO_annotation	KEGG_annotation	KOG_class	KOG_class_annotation	Pfam_annotation	Swissprot_annotation	eggNOG_class	eggNOG_class_annotation	nr_annotation	GO_second_level_annotation	KEGG_pathway_annotation
c226551.graph_c0	[E]	Amino acid transport and metabolism	--	--	[R]	General function prediction only	GMC oxidoreductase;; GMC oxidoreductase	Protein HOTHEAD (Precursor) GN=F3N23.17 OS=Arabidopsis thaliana (Mouse-ear cress) PE=1 SV=1	E	Amino acid transport and metabolism	unknown [Picea sitchensis]	--	--
c177571.graph_c0	--	--	Cellular Component: nucleus (GO:0005634);; Biological Process: alcohol metabolic process (GO:0006066);; Molecular Function: choline dehydrogenase activity (GO:0008812);; Molecular Function: mandelonitrile lyase activity (GO:0046593);; Molecular Function: flavin adenine dinucleotide binding (GO:0050660);; Biological Process: oxidation-reduction process (GO:0055114);;	K00108|1.6059e-13|fve:101303901|(R)-mandelonitrile lyase-like; K00108 choline dehydrogenase [EC:1.1.99.1] (A)	[R]	General function prediction only	--	(R)-mandelonitrile lyase 3 (Precursor) GN=MDL3 OS=Prunus serotina (Black cherry) PE=2 SV=1	E	Amino acid transport and metabolism	unknown [Picea sitchensis]	cellular component: cell (GO:0005623);; cellular component: organelle (GO:0043226);; cellular component: cell part (GO:0044464);; biological process: metabolic process (GO:0008152);; biological process: single-organism process (GO:0044699);; molecular function: catalytic activity (GO:0003824);; molecular function: binding (GO:0005488)	Glycine, serine and threonine metabolism (ko00260)
c234845.graph_c1	[E]	Amino acid transport and metabolism	Biological Process: nitrogen compound metabolic process (GO:0006807);; Molecular Function: racemase and epimerase activity, acting on amino acids and derivatives (GO:0016855);;	--	--	--	Asp/Glu/Hydantoin racemase;; Arginosuccinate synthase	Argininosuccinate synthase, chloroplastic (Precursor) GN=At4g24830 OS=Arabidopsis thaliana (Mouse-ear cress) PE=2 SV=3	--	--	PREDICTED: uncharacterized protein LOC104592379 [Nelumbo nucifera]	biological process: metabolic process (GO:0008152);; molecular function: catalytic activity (GO:0003824)	--
c239967.graph_c0	[M]	Cell wall/membrane/envelope biogenesis	Molecular Function: transferase activity, transferring glycosyl groups (GO:0016757);;	--	[G]	Carbohydrate transport and metabolism	--	Putative glucuronosyltransferase PGSIP8 GN=PGSIP8 OS=Arabidopsis thaliana (Mouse-ear cress) PE=2 SV=1	--	--	hypothetical protein AMTR_s00106p00095310 [Amborella trichopoda]	molecular function: catalytic activity (GO:0003824);; biological process: metabolic process (GO:0008152)	--
c232534.graph_c0	--	--	Molecular Function: monooxygenase activity (GO:0004497);; Molecular Function: copper ion binding (GO:0005507);; Cellular Component: cell wall (GO:0005618);; Biological Process: response to cold (GO:0009409);; Cellular Component: chloroplast thylakoid membrane (GO:0009535);; Cellular Component: chloroplast stroma (GO:0009570);; Biological Process: response to blue light (GO:0009637);; Biological P…	K01602|4.61974e-103|cit:102612988|ribulose bisphosphate carboxylase small chain, chloroplastic-like; K01602 ribulose-bisphosphate carboxylase small chain [EC:4.1.1.39] (A)	--	--	Ribulose bisphosphate carboxylase, small chain;; Ribulose-1,5-bisphosphate carboxylase small subunit	Ribulose bisphosphate carboxylase small chain, chloroplastic (Precursor) GN=RBCS OS=Lactuca sativa (Garden lettuce) PE=2 SV=1	G	Carbohydrate transport and metabolism	ribulose-1,5-bisphosphate carboxylase/oxygenase small subunit [Lactuca sativa]	molecular function: catalytic activity (GO:0003824);; biological process: metabolic process (GO:0008152);; biological process: single-organism process (GO:0044699);; molecular function: binding (GO:0005488);; cellular component: cell (GO:0005623);; cellular component: cell part (GO:0044464);; biological process: response to stimulus (GO:0050896);; cellular component: membrane (GO:0016020);; cellu…	Glyoxylate and dicarboxylate metabolism (ko00630);; Carbon fixation in photosynthetic organisms (ko00710);; Carbon metabolism (ko01200)
c215238.graph_c0	[R]	General function prediction only	Cellular Component: plasma membrane (GO:0005886);; Biological Process: response to aluminum ion (GO:0010044);;	K02069|9.31863e-141|atr:s00023p00173690|AMTR_s00023p00173690; hypothetical protein; K02069 putative ABC transport system permease protein (A)	--	--	Uncharacterised protein family (UPF0014)	UPF0014 membrane protein STAR2 GN=P0496H07.22 OS=Oryza sativa subsp. japonica (Rice) PE=1 SV=1	S	Function unknown	PREDICTED: UPF0014 membrane protein STAR2 [Elaeis guineensis]	cellular component: cell (GO:0005623);; cellular component: membrane (GO:0016020);; cellular component: cell part (GO:0044464);; biological process: response to stimulus (GO:0050896)	--
c237148.graph_c0	[R]	General function prediction only	Molecular Function: 1-aminocyclopropane-1-carboxylate oxidase activity (GO:0009815);; Molecular Function: oxidoreductase activity, acting on paired donors, with incorporation or reduction of molecular oxygen, 2-oxoglutarate as one donor, and incorporation of one atom each of oxygen into both donors (GO:0016706);; Biological Process: response to stimulus (GO:0050896);; Biological Process: oxidatio…	K05933|4.32345e-65|sita:101756803|1-aminocyclopropane-1-carboxylate oxidase 1-like; K05933 aminocyclopropanecarboxylate oxidase [EC:1.14.17.4] (A)	[QR]	--	2OG-Fe(II) oxygenase superfamily	1-aminocyclopropane-1-carboxylate oxidase 1 GN=ACO1 OS=Petunia hybrida (Petunia) PE=1 SV=1	--	--	acc oxidase [Pinus pinaster]	molecular function: catalytic activity (GO:0003824);; biological process: metabolic process (GO:0008152);; biological process: single-organism process (GO:0044699);; biological process: response to stimulus (GO:0050896);; cellular component: cell (GO:0005623);; cellular component: cell part (GO:0044464)	Cysteine and methionine metabolism (ko00270)
c219994.graph_c0	--	--	Cellular Component: plasma membrane (GO:0005886);; Biological Process: establishment or maintenance of cell polarity (GO:0007163);; Biological Process: trichome morphogenesis (GO:0010090);; Cellular Component: SCAR complex (GO:0031209);; Molecular Function: identical protein binding (GO:0042802);; Biological Process: actin nucleation (GO:0045010);;	K05752|3.36666e-13|rcu:RCOM_0230700|Protein BRICK1, putative; K05752 chromosome 3 open reading frame 10 (A)	--	--	--	Protein BRICK 1 GN=BRK1 OS=Arabidopsis thaliana (Mouse-ear cress) PE=1 SV=1	Z	Cytoskeleton	unknown [Picea sitchensis]	cellular component: cell (GO:0005623);; cellular component: membrane (GO:0016020);; cellular component: cell part (GO:0044464);; biological process: cellular process (GO:0009987);; biological process: single-organism process (GO:0044699);; biological process: developmental process (GO:0032502);; biological process: cellular component organization or biogenesis (GO:0071840);; cellular component: m…	--
c237885.graph_c1	--	--	--	--	--	--	Dirigent-like protein	Dirigent protein 11 (Precursor) GN=DIR11 OS=Arabidopsis thaliana (Mouse-ear cress) PE=2 SV=1	--	--	PREDICTED: disease resistance response protein 206-like [Fragaria vesca subsp. vesca]	--	--
c244174.graph_c0	--	--	--	--	--	--	Dirigent-like protein	Dirigent protein 23 (Precursor) GN=DIR23 OS=Arabidopsis thaliana (Mouse-ear cress) PE=2 SV=1	R	General function prediction only	PREDICTED: dirigent protein 22 [Vitis vinifera]	--	--
c243775.graph_c0	--	--	Molecular Function: magnesium ion binding (GO:0000287);; Biological Process: metabolic process (GO:0008152);; Molecular Function: terpene synthase activity (GO:0010333);;	K16086|0|smo:SELMODRAFT_120716|hypothetical protein; K16086 (13E)-labda-7,13-dien-15-ol synthase [EC:3.1.7.10] (A)	--	--	Terpene synthase family, metal binding domain;; Terpene synthase, N-terminal domain;; Prenyltransferase-like;; Prenyltransferase and squalene oxidase repeat	Copalyl diphosphate synthase (Precursor) GN=LPS OS=Ginkgo biloba (Ginkgo) PE=1 SV=1	--	--	pimara-8(14),15-diene synthase [Taiwania cryptomerioides]	molecular function: binding (GO:0005488);; biological process: metabolic process (GO:0008152);; molecular function: catalytic activity (GO:0003824)	Diterpenoid biosynthesis (ko00904)
c235741.graph_c3	--	--	Molecular Function: oxidoreductase activity (GO:0016491);; Molecular Function: flavin adenine dinucleotide binding (GO:0050660);; Biological Process: oxidation-reduction process (GO:0055114);;	--	[C]	Energy production and conversion	--	--	--	--	PREDICTED: apoptosis-inducing factor 2-like [Solanum lycopersicum]	molecular function: catalytic activity (GO:0003824);; biological process: metabolic process (GO:0008152);; biological process: single-organism process (GO:0044699);; molecular function: binding (GO:0005488)	--
c243080.graph_c1	--	--	Cellular Component: Golgi apparatus (GO:0005794);; Molecular Function: electron carrier activity (GO:0009055);; Biological Process: toxin catabolic process (GO:0009407);; Biological Process: response to chitin (GO:0010200);; Biological Process: response to cyclopentenone (GO:0010583);; Molecular Function: oxidoreductase activity (GO:0016491);; Biological Process: hydrogen peroxide catabolic proce…	--	[C]	Energy production and conversion	--	--	C	Energy production and conversion	Apoptosis-inducing factor like A [Glycine soja]	cellular component: cell (GO:0005623);; cellular component: organelle (GO:0043226);; cellular component: cell part (GO:0044464);; molecular function: electron carrier activity (GO:0009055);; biological process: metabolic process (GO:0008152);; biological process: cellular process (GO:0009987);; biological process: single-organism process (GO:0044699);; biological process: response to stimulus (GO…	--
c240707.graph_c0	[C]	Energy production and conversion	Molecular Function: nucleotide binding (GO:0000166);; Molecular Function: L-lactate dehydrogenase activity (GO:0004459);; Cellular Component: cytosol (GO:0005829);; Cellular Component: plasma membrane (GO:0005886);; Biological Process: glycolytic process (GO:0006096);; Biological Process: cellular carbohydrate metabolic process (GO:0044262);; Biological Process: oxidation-reduction process (GO:00…	K00016|8.28666e-176|vvi:100250615|L-lactate dehydrogenase A; K00016 L-lactate dehydrogenase [EC:1.1.1.27] (A)	[C]	Energy production and conversion	lactate/malate dehydrogenase, NAD binding domain;; lactate/malate dehydrogenase, alpha/beta C-terminal domain;; Family 4 glycosyl hydrolase	L-lactate dehydrogenase A OS=Hordeum vulgare (Barley) PE=1 SV=1	--	--	PREDICTED: L-lactate dehydrogenase B-like [Nelumbo nucifera]	molecular function: binding (GO:0005488);; molecular function: catalytic activity (GO:0003824);; biological process: metabolic process (GO:0008152);; biological process: single-organism process (GO:0044699);; cellular component: cell (GO:0005623);; cellular component: cell part (GO:0044464);; cellular component: membrane (GO:0016020);; biological process: cellular process (GO:0009987)	Glycolysis / Gluconeogenesis (ko00010);; Cysteine and methionine metabolism (ko00270);; Pyruvate metabolism (ko00620);; Propanoate metabolism (ko00640)
c240335.graph_c4	[C]	Energy production and conversion	Cellular Component: plasma membrane (GO:0005886);; Cellular Component: chloroplast thylakoid membrane (GO:0009535);; Cellular Component: integral component of membrane (GO:0016021);; Biological Process: plasma membrane ATP synthesis coupled proton transport (GO:0042777);; Cellular Component: proton-transporting ATP synthase complex, coupling factor F(o) (GO:0045263);; Molecular Function: proton-t…	K02108|4.27725e-129|sot:4099857|atpI, SotuCp009; ATPase IV subunit; K02108 F-type H+-transporting ATPase subunit a (A)	[C]	Energy production and conversion	ATP synthase A chain;; Ribosomal protein S2	ATP synthase subunit a, chloroplastic {ECO:0000255|HAMAP-Rule:MF_01393} OS=Cryptomeria japonica (Japanese cedar) PE=3 SV=1	C	Energy production and conversion	ATP synthase CF0 A subunit (chloroplast) [Cunninghamia lanceolata]	cellular component: cell (GO:0005623);; cellular component: membrane (GO:0016020);; cellular component: cell part (GO:0044464);; cellular component: organelle (GO:0043226);; cellular component: organelle part (GO:0044422);; cellular component: membrane part (GO:0044425);; biological process: metabolic process (GO:0008152);; biological process: cellular process (GO:0009987);; biological process: s…	Oxidative phosphorylation (ko00190);; Photosynthesis (ko00195)
c240000.graph_c1	--	--	Cellular Component: mitochondrion (GO:0005739);;	--	--	--	GDP-fucose protein O-fucosyltransferase;; GDP-fucose protein O-fucosyltransferase	Uncharacterized protein At1g04910 GN=At1g04910 OS=Arabidopsis thaliana (Mouse-ear cress) PE=2 SV=1	--	--	PREDICTED: uncharacterized protein At1g04910-like [Musa acuminata subsp. malaccensis]	cellular component: cell (GO:0005623);; cellular component: organelle (GO:0043226);; cellular component: cell part (GO:0044464)	--
c215857.graph_c0	--	--	--	--	--	--	--	GDSL esterase/lipase At4g10955 GN=At4g10955 OS=Arabidopsis thaliana (Mouse-ear cress) PE=2 SV=1	S	Function unknown	BnaC09g26810D [Brassica napus]	--	--
c214774.graph_c0	--	--	--	--	[R]	General function prediction only	Leucine Rich Repeat;; Leucine rich repeat;; Leucine Rich repeats (2 copies);; Leucine Rich repeat;; Leucine rich repeat	Receptor-like protein 12 (Precursor) GN=RLP12 OS=Arabidopsis thaliana (Mouse-ear cress) PE=2 SV=2	R	General function prediction only	hypothetical protein POPTR_0001s27000g [Populus trichocarpa]	--	--
c237742.graph_c0	--	--	Molecular Function: methyltransferase activity (GO:0008168);; Biological Process: methylation (GO:0032259);;	--	[R]	General function prediction only	--	--	--	--	unknown [Picea sitchensis]	molecular function: catalytic activity (GO:0003824);; biological process: metabolic process (GO:0008152)	--
c241576.graph_c0	[O]	Posttranslational modification, protein turnover, chaperones	Molecular Function: glutathione transferase activity (GO:0004364);;	K00799|8.38459e-51|sly:101266195|probable glutathione S-transferase parC; K00799 glutathione S-transferase [EC:2.5.1.18] (A)	[O]	Posttranslational modification, protein turnover, chaperones	Glutathione S-transferase, N-terminal domain;; Glutathione S-transferase, N-terminal domain;; Glutathione S-transferase, N-terminal domain	Probable glutathione S-transferase OS=Nicotiana tabacum (Common tobacco) PE=2 SV=1	O	Posttranslational modification, protein turnover, chaperones	GST [Ginkgo biloba]	molecular function: catalytic activity (GO:0003824);; biological process: metabolic process (GO:0008152)	Glutathione metabolism (ko00480)
c215797.graph_c0	--	--	--	--	[GMW]	--	Exostosin family	Probable glycosyltransferase At5g03795 GN=At5g03795 OS=Arabidopsis thaliana (Mouse-ear cress) PE=3 SV=2	W	Extracellular structures	PREDICTED: probable glycosyltransferase At5g25310 [Prunus mume]	--	--
c227120.graph_c0	[M]	Cell wall/membrane/envelope biogenesis	--	--	--	--	Glycosyltransferase family 92;; Glycosyl transferase family 2	UPF0392 protein RCOM_0530710 GN=RCOM_0699480 OS=Ricinus communis (Castor bean) PE=3 SV=1	S	Function unknown	unknown [Picea sitchensis]	--	--
c229257.graph_c0	--	--	--	--	[S]	Function unknown	Glycosyltransferase family 92;; Glycosyl transferase family 2	--	S	Function unknown	PREDICTED: uncharacterized protein LOC105050478 [Elaeis guineensis]	--	--
c236868.graph_c0	[E]	Amino acid transport and metabolism	--	K05387|1.8307e-96|sita:101770289|glutamate receptor 3.4-like; K05387 glutamate receptor, ionotropic, plant (A)	[PET]	--	Receptor family ligand binding region;; Periplasmic binding protein	Glutamate receptor 3.5 (Precursor) GN=T32F6.9 OS=Arabidopsis thaliana (Mouse-ear cress) PE=2 SV=2	P	Inorganic ion transport and metabolism	PREDICTED: glutamate receptor 3.4-like [Setaria italica]	--	--
c188834.graph_c0	--	--	--	--	--	--	NmrA-like family;; NADH(P)-binding;; NAD dependent epimerase/dehydratase family	Bifunctional pinoresinol-lariciresinol reductase OS=Thuja plicata (Western red-cedar) PE=2 SV=1	--	--	isoflavone reductase-like protein CJP-6 [Cryptomeria japonica]	--	--
c224043.graph_c0	--	--	--	--	--	--	NmrA-like family;; KR domain;; short chain dehydrogenase;; NAD dependent epimerase/dehydratase family	Isoflavone reductase homolog A622 OS=Nicotiana tabacum (Common tobacco) PE=2 SV=1	--	--	isoflavone reductase-like protein CJP-6 [Cryptomeria japonica]	--	--
c194639.graph_c0	[I]	Lipid transport and metabolism	Molecular Function: sphingosine hydroxylase activity (GO:0000170);; Molecular Function: iron ion binding (GO:0005506);; Cellular Component: endoplasmic reticulum (GO:0005783);; Cellular Component: Golgi apparatus (GO:0005794);; Biological Process: fatty acid biosynthetic process (GO:0006633);; Biological Process: photomorphogenesis (GO:0009640);; Cellular Component: integral component of membrane…	K04713|6.17671e-48|tcc:TCM_011723|Sphingoid base hydroxylase 2; K04713 sphinganine C4-monooxygenase [EC:1.14.13.169] (A)	[I]	Lipid transport and metabolism	--	Sphinganine C(4)-monooxygenase 1 GN=SBH1 OS=Arabidopsis thaliana (Mouse-ear cress) PE=1 SV=1	I	Lipid transport and metabolism	unknown [Picea sitchensis]	molecular function: catalytic activity (GO:0003824);; biological process: metabolic process (GO:0008152);; biological process: single-organism process (GO:0044699);; molecular function: binding (GO:0005488);; cellular component: cell (GO:0005623);; cellular component: organelle (GO:0043226);; cellular component: cell part (GO:0044464);; biological process: cellular process (GO:0009987);; biologic…	Sphingolipid metabolism (ko00600)
c238326.graph_c0	--	--	--	--	[S]	Function unknown	Ndr family;; Alpha/beta hydrolase family	Pollen-specific protein SF21 GN=SF21 OS=Helianthus annuus (Common sunflower) PE=2 SV=1	--	--	unknown [Picea sitchensis]	--	--
c233023.graph_c0	--	--	--	--	--	--	Family of unknown function (DUF566)	QWRF motif-containing protein 8 GN=QWRF8 OS=Arabidopsis thaliana (Mouse-ear cress) PE=2 SV=1	S	Function unknown	hypothetical protein AMTR_s00137p00052220 [Amborella trichopoda]	--	--
c227287.graph_c0	[Q]	Secondary metabolites biosynthesis, transport and catabolism	Molecular Function: monooxygenase activity (GO:0004497);; Cellular Component: membrane (GO:0016020);; Molecular Function: oxidoreductase activity, acting on paired donors, with incorporation or reduction of molecular oxygen (GO:0016705);; Molecular Function: metal ion binding (GO:0046872);;	--	[QI]	--	Cytochrome P450	Cytochrome P450 720B2 GN=CYP720B2 OS=Pinus taeda (Loblolly pine) PE=2 SV=1	Q	Secondary metabolites biosynthesis, transport and catabolism	RecName: Full=Cytochrome P450 720B2; AltName: Full=Cytochrome P450 CYPB [Pinus taeda]	molecular function: catalytic activity (GO:0003824);; biological process: metabolic process (GO:0008152);; biological process: single-organism process (GO:0044699);; cellular component: membrane (GO:0016020);; molecular function: binding (GO:0005488)	--
c243487.graph_c0	[O]	Posttranslational modification, protein turnover, chaperones	--	K15095|8.27951e-67|mus:104000601|(+)-neomenthol dehydrogenase-like; K15095 (+)-neomenthol dehydrogenase [EC:1.1.1.208] (A)	[Q]	Secondary metabolites biosynthesis, transport and catabolism	Ring finger domain;; RING-H2 zinc finger	(+)-neomenthol dehydrogenase GN=SDR1 OS=Arabidopsis thaliana (Mouse-ear cress) PE=1 SV=1	Q	Secondary metabolites biosynthesis, transport and catabolism	PREDICTED: (+)-neomenthol dehydrogenase-like isoform X3 [Nelumbo nucifera]	--	Monoterpenoid biosynthesis (ko00902)
c203486.graph_c1	--	--	--	--	--	--	Protein tyrosine kinase;; Protein kinase domain	Probable leucine-rich repeat receptor-like protein kinase At1g35710 (Precursor) GN=At1g35710 OS=Arabidopsis thaliana (Mouse-ear cress) PE=2 SV=1	T	Signal transduction mechanisms	PREDICTED: probable LRR receptor-like serine/threonine-protein kinase At4g08850 [Zea mays]	--	--
c243425.graph_c1	[RTKL]	--	Molecular Function: transferase activity, transferring phosphorus-containing groups (GO:0016772);;	--	--	--	Protein kinase domain;; Protein tyrosine kinase;; D-mannose binding lectin	G-type lectin S-receptor-like serine/threonine-protein kinase SD2-5 (Precursor) GN=SD25 OS=Arabidopsis thaliana (Mouse-ear cress) PE=1 SV=1	T	Signal transduction mechanisms	unnamed protein product [Coffea canephora]	molecular function: catalytic activity (GO:0003824);; biological process: metabolic process (GO:0008152)	--
c234627.graph_c0	[T]	Signal transduction mechanisms	Biological Process: phosphorelay signal transduction system (GO:0000160);; Molecular Function: protein histidine kinase activity (GO:0004673);; Molecular Function: signal transducer activity (GO:0004871);; Molecular Function: binding (GO:0005488);; Cellular Component: membrane (GO:0016020);; Biological Process: phosphorylation (GO:0016310);;	K14509|0|ppp:PHYPADRAFT_188161|ETR2; ETR2 ethylene receptor; K14509 ethylene receptor [EC:2.7.13.-] (A)	[T]	Signal transduction mechanisms	GAF domain;; His Kinase A (phospho-acceptor) domain;; GAF domain;; Response regulator receiver domain	Ethylene receptor GN=ETR1 OS=Malus domestica (Apple) PE=2 SV=1	T	Signal transduction mechanisms	ETR2 ethylene receptor [Physcomitrella patens]	biological process: cellular process (GO:0009987);; biological process: signaling (GO:0023052);; biological process: single-organism process (GO:0044699);; biological process: response to stimulus (GO:0050896);; biological process: biological regulation (GO:0065007);; molecular function: catalytic activity (GO:0003824);; biological process: metabolic process (GO:0008152);; molecular function: mol…	Plant hormone signal transduction (ko04075)
c238415.graph_c1	--	--	--	--	--	--	Terpene synthase, N-terminal domain;; Terpene synthase family, metal binding domain	Gamma-humulene synthase GN=ag5 OS=Abies grandis (Grand fir) PE=1 SV=1	--	--	longifolene synthase [Pinus sylvestris]	--	--
c230374.graph_c0	[IM]	--	Cellular Component: chloroplast stroma (GO:0009570);; Biological Process: isopentenyl diphosphate biosynthetic process, methylerythritol 4-phosphate pathway (GO:0019288);; Molecular Function: 4-hydroxy-3-methylbut-2-en-1-yl diphosphate synthase activity (GO:0046429);; Molecular Function: 4-hydroxy-3-methylbut-2-en-1-yl diphosphate reductase activity (GO:0051745);; Biological Process: oxidation-re…	K03527|2.4582e-166|mus:103993826|4-hydroxy-3-methylbut-2-enyl diphosphate reductase, chloroplastic-like; K03527 4-hydroxy-3-methylbut-2-enyl diphosphate reductase [EC:1.17.1.2] (A)	--	--	LytB protein;; LytB protein	4-hydroxy-3-methylbut-2-enyl diphosphate reductase, chloroplastic (Precursor) GN=OSJNBa0079G12.18 OS=Oryza sativa subsp. japonica (Rice) PE=2 SV=1	--	--	1-hydroxy-2-methyl-2-(E)-butenyl 4-diphosphate reductase [Taxus x media]	cellular component: cell (GO:0005623);; cellular component: organelle (GO:0043226);; cellular component: organelle part (GO:0044422);; cellular component: cell part (GO:0044464);; biological process: metabolic process (GO:0008152);; biological process: cellular process (GO:0009987);; biological process: single-organism process (GO:0044699);; molecular function: catalytic activity (GO:0003824)	Terpenoid backbone biosynthesis (ko00900)
c242808.graph_c0	[I]	Lipid transport and metabolism	Molecular Function: ATP binding (GO:0005524);; Biological Process: heme biosynthetic process (GO:0006783);; Cellular Component: chloroplast (GO:0009507);; Cellular Component: chromoplast (GO:0009509);; Biological Process: response to blue light (GO:0009637);; Biological Process: response to high light intensity (GO:0009644);; Biological Process: response to sucrose (GO:0009744);; Biological Proce…	K00919|4.55862e-137|atr:s00038p00142520|AMTR_s00038p00142520; hypothetical protein; K00919 4-diphosphocytidyl-2-C-methyl-D-erythritol kinase [EC:2.7.1.148] (A)	--	--	GHMP kinases N terminal domain	4-diphosphocytidyl-2-C-methyl-D-erythritol kinase, chloroplastic/chromoplastic (Precursor; Fragment) GN=ISPE OS=Solanum lycopersicum (Tomato) PE=1 SV=1	H	Coenzyme transport and metabolism	type 1 4-diphosphocytidyl-2C-methyl-D-erythritol kinase [Ginkgo biloba]	molecular function: binding (GO:0005488);; biological process: metabolic process (GO:0008152);; biological process: cellular process (GO:0009987);; biological process: single-organism process (GO:0044699);; cellular component: cell (GO:0005623);; cellular component: organelle (GO:0043226);; cellular component: cell part (GO:0044464);; biological process: response to stimulus (GO:0050896);; biolog…	Terpenoid backbone biosynthesis (ko00900)
c243074.graph_c4	--	--	Molecular Function: ATP binding (GO:0005524);; Biological Process: heme biosynthetic process (GO:0006783);; Cellular Component: chloroplast thylakoid membrane (GO:0009535);; Cellular Component: chloroplast stroma (GO:0009570);; Biological Process: response to blue light (GO:0009637);; Biological Process: response to high light intensity (GO:0009644);; Biological Process: response to sucrose (GO:0…	K00919|2.81265e-19|gmx:100779074|4-diphosphocytidyl-2-C-methyl-D-erythritol kinase, chloroplastic/chromoplastic-like; K00919 4-diphosphocytidyl-2-C-methyl-D-erythritol kinase [EC:2.7.1.148] (A)	--	--	--	4-diphosphocytidyl-2-C-methyl-D-erythritol kinase, chloroplastic (Precursor) OS=Oryza sativa subsp. japonica (Rice) PE=2 SV=1	H	Coenzyme transport and metabolism	type 1 4-diphosphocytidyl-2C-methyl-D-erythritol kinase [Ginkgo biloba]	molecular function: binding (GO:0005488);; biological process: metabolic process (GO:0008152);; biological process: cellular process (GO:0009987);; biological process: single-organism process (GO:0044699);; cellular component: cell (GO:0005623);; cellular component: membrane (GO:0016020);; cellular component: organelle (GO:0043226);; cellular component: organelle part (GO:0044422);; cellular comp…	Terpenoid backbone biosynthesis (ko00900)
c127638.graph_c0	--	--	Biological Process: regionalization (GO:0003002);; Biological Process: anatomical structure morphogenesis (GO:0009653);; Cellular Component: membrane (GO:0016020);; Cellular Component: cytoplasmic membrane-bounded vesicle (GO:0016023);; Biological Process: single-organism developmental process (GO:0044767);; Biological Process: meristem development (GO:0048507);; Biological Process: biological re…	--	--	--	Tetraspanin family	Tetraspanin-2 GN=TET2 OS=Arabidopsis thaliana (Mouse-ear cress) PE=2 SV=1	S	Function unknown	putative senescence-associated protein [Cupressus sempervirens]	biological process: multicellular organismal process (GO:0032501);; biological process: developmental process (GO:0032502);; biological process: single-organism process (GO:0044699);; cellular component: membrane (GO:0016020);; cellular component: cell (GO:0005623);; cellular component: organelle (GO:0043226);; cellular component: cell part (GO:0044464);; biological process: biological regulation…	--
c192129.graph_c0	--	--	Cellular Component: integral component of membrane (GO:0016021);;	--	--	--	Tetraspanin family	Tetraspanin-8 GN=TET8 OS=Arabidopsis thaliana (Mouse-ear cress) PE=2 SV=1	S	Function unknown	unknown [Picea sitchensis]	cellular component: membrane (GO:0016020);; cellular component: membrane part (GO:0044425)	--
c192129.graph_c1	--	--	Cellular Component: plasma membrane (GO:0005886);; Cellular Component: integral component of membrane (GO:0016021);; Cellular Component: cytoplasmic membrane-bounded vesicle (GO:0016023);;	--	--	--	--	Tetraspanin-8 GN=TET8 OS=Arabidopsis thaliana (Mouse-ear cress) PE=2 SV=1	S	Function unknown	unknown [Picea sitchensis]	cellular component: cell (GO:0005623);; cellular component: membrane (GO:0016020);; cellular component: cell part (GO:0044464);; cellular component: membrane part (GO:0044425);; cellular component: organelle (GO:0043226)	--
c231390.graph_c0	--	--	Cellular Component: plasma membrane (GO:0005886);; Cellular Component: integral component of membrane (GO:0016021);; Cellular Component: cytoplasmic membrane-bounded vesicle (GO:0016023);;	--	--	--	Tetraspanin family	Tetraspanin-8 GN=TET8 OS=Arabidopsis thaliana (Mouse-ear cress) PE=2 SV=1	S	Function unknown	unknown [Picea sitchensis]	cellular component: cell (GO:0005623);; cellular component: membrane (GO:0016020);; cellular component: cell part (GO:0044464);; cellular component: membrane part (GO:0044425);; cellular component: organelle (GO:0043226)	--
c214880.graph_c0	[KAD]	--	--	K09422|3.92747e-80|pda:103696914|transcription factor AS1-like; K09422 myb proto-oncogene protein, plant (A)	[K]	Transcription	Myb-like DNA-binding domain;; Myb-like DNA-binding domain	Protein rough sheath 2 GN=RS2 OS=Zea mays (Maize) PE=1 SV=1	K	Transcription	phantastica [Streptocarpus rexii]	--	--
c223129.graph_c0	[KAD]	--	Molecular Function: DNA binding (GO:0003677);; Molecular Function: chromatin binding (GO:0003682);;	K09422|4.49601e-46|csv:101220321|myb-related protein 305-like; K09422 myb proto-oncogene protein, plant (A)	[K]	Transcription	Myb-like DNA-binding domain;; Myb-like DNA-binding domain	Transcription factor MYB21 GN=MGF10.23 OS=Arabidopsis thaliana (Mouse-ear cress) PE=1 SV=1	K	Transcription	PREDICTED: transcription factor MYB108-like [Nicotiana tomentosiformis]	molecular function: binding (GO:0005488)	--
c224688.graph_c0	--	--	Molecular Function: O-acetyltransferase activity (GO:0016413);;	--	--	--	Transferase family	3&apos;-N-debenzoyl-2&apos;-deoxytaxol N-benzoyltransferase GN=TAX10 OS=Taxus canadensis (Canadian yew) PE=1 SV=1	--	--	taxadien-5-alpha-ol-O-acetyltransferase [Taxus cuspidata]	molecular function: catalytic activity (GO:0003824);; biological process: metabolic process (GO:0008152)	--
c235789.graph_c0	--	--	--	--	--	--	Transferase family	BAHD acyltransferase DCR GN=MRO11.2 OS=Arabidopsis thaliana (Mouse-ear cress) PE=2 SV=1	--	--	unknown [Picea sitchensis]	--	--
c152426.graph_c0	--	--	--	--	--	--	--	--	S	Function unknown	unknown [Picea sitchensis]	--	--
c152601.graph_c0	--	--	--	--	--	--	--	--	--	--	--	--	--
c179516.graph_c0	--	--	--	--	--	--	--	--	--	--	--	--	--
c208462.graph_c0	--	--	--	--	--	--	--	--	--	--	unknown [Picea sitchensis]	--	--
c216169.graph_c0	--	--	--	--	--	--	--	--	--	--	unknown [Picea sitchensis]	--	--
c218843.graph_c0	--	--	--	--	--	--	--	--	--	--	--	--	--
c219461.graph_c0	--	--	--	--	--	--	--	--	--	--	--	--	--
c223882.graph_c0	--	--	Molecular Function: nucleic acid binding (GO:0003676);; Molecular Function: catalytic activity (GO:0003824);; Biological Process: DNA metabolic process (GO:0006259);;	--	[R]	General function prediction only	--	--	--	--	unknown [Picea sitchensis]	molecular function: binding (GO:0005488);; molecular function: catalytic activity (GO:0003824);; biological process: metabolic process (GO:0008152);; biological process: cellular process (GO:0009987)	--
c231933.graph_c1	--	--	--	--	--	--	--	--	--	--	--	--	--
c234836.graph_c0	--	--	--	--	--	--	--	--	--	--	--	--	--
c235702.graph_c1	--	--	--	--	--	--	--	--	--	--	--	--	--
c238564.graph_c1	--	--	--	--	--	--	--	--	--	--	unknown [Picea sitchensis]	--	--
c240275.graph_c2	--	--	--	--	--	--	--	--	--	--	--	--	--
c243828.graph_c0	--	--	--	--	--	--	Domain of unknown function (DUF4283)	--	R	General function prediction only	PREDICTED: uncharacterized protein LOC104881299 [Vitis vinifera]	--	--

## Sheet: Table S10
	Table S10. KEGG classification analysis of the hub genes
#Kegg_pathway	ko_id	Cluster_frequency	Genome_frequency	P-value	Corrected_P-value	rich_factor
Terpenoid backbone biosynthesis	ko00900	3 out of 13 23.0769230769231%	103.0 out of 11356 0.907009510390983%	0.000194011	0.00310418	25.4429
Monoterpenoid biosynthesis	ko00902	1 out of 13 7.69230769230769%	8.0 out of 11356 0.0704473406128919%	0.00912435	0.14599	109.192
Cysteine and methionine metabolism	ko00270	2 out of 13 15.3846153846154%	278.0 out of 11356 2.44804508629799%	0.0389894	0.62383	6.28445
Diterpenoid biosynthesis	ko00904	1 out of 13 7.69230769230769%	37.0 out of 11356 0.325818950334625%	0.0415598	0.664956	23.6091
Sphingolipid metabolism	ko00600	1 out of 13 7.69230769230769%	103.0 out of 11356 0.907009510390983%	0.111759	1	8.48096
Photosynthesis	ko00195	1 out of 13 7.69230769230769%	129.0 out of 11356 1.13596336738288%	0.138086	1	6.77162
Propanoate metabolism	ko00640	1 out of 13 7.69230769230769%	129.0 out of 11356 1.13596336738288%	0.138086	1	6.77162
Glycine, serine and threonine metabolism	ko00260	1 out of 13 7.69230769230769%	202.0 out of 11356 1.77879535047552%	0.208202	1	4.32445
Plant hormone signal transduction	ko04075	1 out of 13 7.69230769230769%	215.0 out of 11356 1.89327227897147%	0.220122	1	4.06297
Carbon fixation in photosynthetic organisms	ko00710	1 out of 13 7.69230769230769%	246.0 out of 11356 2.16625572384642%	0.247881	1	3.55097
Glutathione metabolism	ko00480	1 out of 13 7.69230769230769%	252.0 out of 11356 2.21909122930609%	0.253147	1	3.46642
Glyoxylate and dicarboxylate metabolism	ko00630	1 out of 13 7.69230769230769%	260.0 out of 11356 2.28953856991899%	0.260116	1	3.35976
Pyruvate metabolism	ko00620	1 out of 13 7.69230769230769%	266.0 out of 11356 2.34237407537865%	0.265303	1	3.28398
Glycolysis / Gluconeogenesis	ko00010	1 out of 13 7.69230769230769%	374.0 out of 11356 3.29341317365269%	0.353115	1	2.33566
Oxidative phosphorylation	ko00190	1 out of 13 7.69230769230769%	572.0 out of 11356 5.03698485382177%	0.489436	1	1.52717
Carbon metabolism	ko01200	1 out of 13 7.69230769230769%	863.0 out of 11356 7.59950686861571%	0.642299	1	1.01221
